# Supplementary material for: Polymerization of phenylacetylenes by binuclear rhodium catalysts with different para-binucleating phenoxyiminato linkages
Source: Royal Society of Chemistry journal article supplement (doi:10.1039/c9py00594c), 2019-01-01
Supplement: c9py00594c1.pdf [file c9py00594c1.pdf]

## Polymerization of Phenylacetylenes by Binuclear Rhodium Catalysts with Different *para*-Binucleating Phenoxyiminato Linkages

Xiaolu Wu,<sup>a†</sup> Pengfei Zhang,<sup>a†</sup> Zhi Yang,<sup>a</sup> Shaowen Zhang,<sup>a</sup> Hao Liu,<sup>a</sup> Weijie Chi,<sup>a</sup> Xiaofang Li,<sup>a\*</sup> Yuping Dong,<sup>b\*</sup> Nannan Qiu,<sup>c\*</sup> Li Yan<sup>d</sup>

<sup>a</sup> Key Laboratory of Cluster Science of Ministry of Education, School of Chemistry and Chemical Engineering, Beijing Institute of Technology, 5 South Zhongguancun Street, Haidian District, Beijing, 100081, China

<sup>b</sup> Beijing Key Laboratory of Construction Tailorable Advanced Functional Materials and Green Applications, School of Materials Science and Engineering, Beijing Institute of Technology, Beijing 100081, China

<sup>c</sup> Key Laboratory of Food Safety Risk Assessment, Ministry of Health, China National Centre for Food Safety Risk Assessment, Beijing, 100021, China

<sup>d</sup> Analytical and Testing Center, Beijing Institute of Technology, 5 South Zhongguancun Street, Haidian District, Beijing 100081, China

# Table of Contents

## Experimental Section

### Materials.

### X-ray Crystallographic Study.

**Scheme S1.** Synthesis of (*S,E*)-2-(((1-phenylethyl)imino)methyl)phenol ligand **L1**.

**Scheme S2** Synthesis of 4,4'-bis((*E*)-(((*S*)-1-phenylethyl)imino)methyl)-[1,1'-biphenyl]-3,3'-diol ligand **L2**.

Synthesis of 4-iodo-3,3'-dimethoxy-4'-methyl-1,1'-biphenyl (**L2-1**)

Synthesis of 3,3'-dimethoxy-[1,1'-biphenyl]-4,4'-dicarbaldehyde (**L2-2**)

Synthesis of 3,3'-dihydroxy-[1,1'-biphenyl]-4,4'-dicarbaldehyde (**L2-3**)

Synthesis of 4,4'-bis((*E*)-(((*S*)-1-phenylethyl)imino)methyl)-[1,1'-biphenyl]-3,3'-diol (**L2**)

**Scheme S3.** Synthesis of 2,5-bis((*E*)-(((*S*)-1-phenylethyl)imino)methyl)benzene-1,4-diol ligand **L3**.

Synthesis of 1,4-dibromo-2,5-dimethoxybenzene (**L3-1**).

Synthesis of 2,5-dimethoxyterephthalaldehyde (**L3-2**)

Synthesis of 2,5-dihydroxyterephthalaldehyde (**L3-3**)

Synthesis of 2,5-bis((*E*)-(((*S*)-1-phenylethyl)imino)methyl)benzene-1,4-diol (**L3**)

**Scheme S4.** Synthesis of 2,6-bis((*E*)-((1-phenylethyl)imino)methyl)naphthalene-1,5-diol ligand **L4**.

Synthesis of 2,6-dibromonaphthalene-1,5-diol (**L4-1**)

Synthesis of 2,6-dibromo-1,5-dimethoxynaphthalene (**L4-2**)

Synthesis of 1,5-dimethoxynaphthalene-2,6-dicarbaldehyde (**L4-3**)

Synthesis of 1,5-dihydroxynaphthalene-2,6-dicarbaldehyde (**L4-4**)

Synthesis of 2,6-bis((*E*)-((1-phenylethyl)imino)methyl)naphthalene-1,5-diol (**L4**)

**Scheme S5.** Synthesis of Rh Complex **1**.

Synthesis of Rh complexes **1a**.

Synthesis of Rh complexes **1b**.

**Scheme S6** Synthesis of Rh Complexes **2**.

Synthesis of Rh complexes **2a**.

Synthesis of Rh complexes **2b**.

**Scheme S7** Synthesis of Rh Complexes **3**.

Synthesis of Rh complexes **3a**.

Synthesis of Rh complexes **3b**.

**Scheme S8** Synthesis of Rh Complexes **4**.

Synthesis of Rh complexes **4a**.

Synthesis of Rh complexes **4b**.

**Scheme S9.** Synthesis of 4-ethynyl-4'-(1,2,2-triphenylvinyl)-1,1'-biphenyl (**TPA**).

Synthesis of (2-(4-bromophenyl)ethene-1,1,2-triyl)tribenzene (**7**).

Synthesis of (4-(1,2,2-triphenylvinyl)phenyl)boronic acid (**8**).

Synthesis of ((4-bromophenyl)ethynyl)trimethylsilane (**10**).

Synthesis of trimethyl((4'-(1,2,2-triphenylvinyl)-[1,1'-biphenyl]-4-yl)ethynyl)silane (**11**).

Synthesis of 4-ethynyl-4'-(1,2,2-triphenylvinyl)-1,1'-biphenyl (**TPA**).

**Scheme S10.** Synthesis of (2-(dodecyloxy)-5-ethynyl-1,3-phenylene)dimethanol (**HPA**).

Synthesis of (5-bromo-2-hydroxy-1,3-phenylene)dimethanol (**13**).

Synthesis of (5-bromo-2-(dodecyloxy)-1,3-phenylene)dimethanol (**14**).

Synthesis of (2-(dodecyloxy)-5-((trimethylsilyl)ethynyl)-1,3-phenylene)dimethanol (15).

Synthesis of (2-(dodecyloxy)-5-ethynyl-1,3-phenylene)dimethanol (**HPA**).

General procedure for aqueous polymerization of phenylacetylene.

**Figure S1.** <sup>1</sup>H NMR spectrum of (*S,E*)-2-(((1-phenylethyl)imino)methyl)phenol ligand **L1**.

**Figure S2.** <sup>1</sup>H NMR spectrum of

4,4'-bis((*E*)-(((*S*)-1-phenylethyl)imino)methyl)-[1,1'-biphenyl]-3,3'-diol ligand **L2**.

**Figure S3.** <sup>13</sup>C NMR spectrum of

4,4'-bis((*E*)-(((*S*)-1-phenylethyl)imino)methyl)-[1,1'-biphenyl]-3,3'-diol ligand **L2**.

**Figure S4.** <sup>1</sup>H NMR spectrum of 2,5-bis((*E*)-(((*S*)-1-phenylethyl)imino)methyl)benzene-1,4-diol ligand **L3**.

**Figure S5.** <sup>13</sup>C NMR spectrum of 2,5-bis((*E*)-(((*S*)-1-phenylethyl)imino)methyl)benzene-1,4-diol ligand **L3**.

**Figure S6.** <sup>1</sup>H NMR spectrum of 2,6-bis((*E*)-((1-phenylethyl)imino)methyl)naphthalene-1,5-diol ligand **L4**.

**Figure S7.** <sup>13</sup>C NMR spectrum of 2,6-bis((*E*)-((1-phenylethyl)imino)methyl)naphthalene-1,5-diol ligand **L4**.

**Figure S8.** <sup>1</sup>H NMR spectrum of Rh complexes **1a** (400MHz, CDCl<sub>3</sub>, 25°C).

**Figure S9.** <sup>13</sup>C NMR spectrum of Rh complexes **1a** (100MHz, CDCl<sub>3</sub>, 25°C).

**Figure S10.** <sup>1</sup>H NMR spectrum of Rh complexes **1b** (400MHz, CDCl<sub>3</sub>, 25°C).

**Figure S11.** <sup>13</sup>C NMR spectrum of Rh complexes **1b** (100MHz, CDCl<sub>3</sub>, 25°C).

**Figure S12.** <sup>1</sup>H NMR spectrum of Rh complexes **2a** (400MHz, CDCl<sub>3</sub>, 25°C).

**Figure S13.** <sup>13</sup>C NMR spectrum of Rh complexes **2a** (100MHz, CDCl<sub>3</sub>, 25°C).

**Figure S14.** <sup>1</sup>H NMR spectrum of Rh complexes **2b** (400MHz, CDCl<sub>3</sub>, 25°C).

**Figure S15.** <sup>13</sup>C NMR spectrum of 1 Rh complexes **2b** (100MHz, CDCl<sub>3</sub>, 25°C).

**Figure S16.** <sup>1</sup>H NMR spectrum of Rh complexes **3a** (400MHz, CDCl<sub>3</sub>, 25°C).

**Figure S17.** <sup>13</sup>C NMR spectrum of Rh complexes **3a** (100MHz, CDCl<sub>3</sub>, 25°C).

**Figure S18.** <sup>1</sup>H NMR spectrum of Rh complexes **3b** (400MHz, CDCl<sub>3</sub>, 25°C).

**Figure S19.** <sup>13</sup>C NMR spectrum of Rh complexes **3b** (100MHz, CDCl<sub>3</sub>, 25°C).

**Figure S20.** <sup>1</sup>H NMR spectrum of Rh complexes **4a** (400MHz, CDCl<sub>3</sub>, 25°C).

**Figure S21.** <sup>13</sup>C NMR spectrum of Rh complexes **4a** (100MHz, CDCl<sub>3</sub>, 25°C).

**Figure S22.** <sup>1</sup>H NMR spectrum of Rh complexes **4b** (400MHz, CDCl<sub>3</sub>, 25°C).

**Figure S23.** <sup>13</sup>C NMR spectrum of Rh complexes **4b** (100MHz, CDCl<sub>3</sub>, 25°C).

**Figure S24.** <sup>1</sup>H NMR spectrum of 4-ethynyl-4'-(1,2,2-triphenylvinyl)-1,1'-biphenyl (**TPA**) (400MHz, CDCl<sub>3</sub>, 25°C).

**Figure S25.** <sup>1</sup>H NMR spectrum of (2-(dodecyloxy)-5-ethynyl-1,3-phenylene)dimethanol (**HPA**) (400MHz, CDCl<sub>3</sub>, 25°C).

**Figure S26.** <sup>1</sup>H NMR spectra of phenoxyimine ligands and phenoxyiminato ligated Rh complexes (1-4)(a-b) in CDCl<sub>3</sub> in air. (400MHz, CDCl<sub>3</sub>, 25°C)

**Figure S27.** <sup>1</sup>H NMR spectrum of polymer in Table 3, entry 1 (400MHz, CDCl<sub>3</sub>, 25°C).

**Figure S28.** <sup>1</sup>H NMR spectrum of polymer in Table 3, entry 2 (400MHz, CDCl<sub>3</sub>, 25°C).

**Figure S29.** <sup>1</sup>H NMR spectrum of polymer in Table 3, entry 3 (400MHz, CDCl<sub>3</sub>, 25°C).

**Figure S30.** <sup>1</sup>H NMR spectrum of polymer in Table 3, entry 4 (400MHz, CDCl<sub>3</sub>, 25°C).

**Figure S31.** <sup>1</sup>H NMR spectrum of polymer in Table 3, entry 7 (400MHz, CDCl<sub>3</sub>, 25°C).

**Figure S32.** <sup>1</sup>H NMR spectrum of polymer in Table 3, entry 12 (400MHz, CDCl<sub>3</sub>, 25°C).

**Figure S33.** <sup>1</sup>H NMR spectrum of polymer in Table 3, entry 13 (400MHz, CDCl<sub>3</sub>, 25°C).  
**Figure S34.** <sup>1</sup>H NMR spectrum of polymer in Table 3, entry 14 (400MHz, CDCl<sub>3</sub>, 25°C).  
**Figure S35.** <sup>1</sup>H NMR spectrum of polymer in Table 4, entry 3 (400MHz, CDCl<sub>3</sub>, 25°C).  
**Figure S36.** <sup>1</sup>H NMR spectrum of polymer in Table 4, entry 7 (400MHz, CDCl<sub>3</sub>, 25°C).  
**Figure S37.** <sup>1</sup>H NMR spectrum of polymer in Table 4, entry 11 (400MHz, CDCl<sub>3</sub>, 25°C).  
**Figure S38.** <sup>1</sup>H NMR spectrum of polymer in Table 4, entry 15 (400MHz, CDCl<sub>3</sub>, 25°C).  
**Figure S39.** <sup>1</sup>H NMR spectrum of polymer in Table 5, entry 2 (400MHz, CDCl<sub>3</sub>, 25°C).  
**Figure S40.** <sup>1</sup>H NMR spectrum of polymer in Table 5, entry 4 (400MHz, CDCl<sub>3</sub>, 25°C).  
**Figure S41.** <sup>13</sup>C NMR spectra of **3b**/PA mixture with a molar ratio of 1 : 0.3 in Toluene-*d*<sub>8</sub>.  
**Figure S42.** GPC curve of polymer in Table 3, entry 1.  
**Figure S43.** GPC curve of polymer in Table 3, entry 2.  
**Figure S44.** GPC curve of polymer in Table 3, entry 3.  
**Figure S45.** GPC curve of polymer in Table 3, entry 4.  
**Figure S46.** GPC curve of polymer in Table 3, entry 5.  
**Figure S47.** GPC curve of polymer in Table 3, entry 6.  
**Figure S48.** GPC curve of polymer in Table 3, entry 7.  
**Figure S49.** GPC curve of polymer in Table 3, entry 8.  
**Figure S50.** GPC curve of polymer in Table 3, entry 9.  
**Figure S51.** GPC curve of polymer in Table 3, entry 10.  
**Figure S52.** GPC curve of polymer in Table 3, entry 11.  
**Figure S53.** GPC curve of polymer in Table 3, entry 12.  
**Figure S54.** GPC curve of polymer in Table 3, entry 13.  
**Figure S55.** GPC curve of polymer in Table 3, entry 14.  
**Figure S56.** GPC curve of polymer in Table 4, entry 1.  
**Figure S57.** GPC curve of polymer in Table 4, entry 2.  
**Figure S58.** GPC curve of polymer in Table 4, entry 3.  
**Figure S59.** GPC curve of polymer in Table 4, entry 4.  
**Figure S60.** GPC curve of polymer in Table 4, entry 5.  
**Figure S61.** GPC curve of polymer in Table 4, entry 6.  
**Figure S62.** GPC curve of polymer in Table 4, entry 7.  
**Figure S63.** GPC curve of polymer in Table 4, entry 8.  
**Figure S64.** GPC curve of polymer in Table 4, entry 9.  
**Figure S65.** GPC curve of polymer in Table 4, entry 10.  
**Figure S66.** GPC curve of polymer in Table 4, entry 11.  
**Figure S67.** GPC curve of polymer in Table 4, entry 12.  
**Figure S68.** GPC curve of polymer in Table 4, entry 13.  
**Figure S69.** GPC curve of polymer in Table 4, entry 14.  
**Figure S70.** GPC curve of polymer in Table 4, entry 15.  
**Figure S71.** GPC curve of polymer in Table 4, entry 16.  
**Figure S72.** GPC curve of polymer in Table 4, entry 17.  
**Figure S73.** GPC curve of polymer in Table 4, entry 18.  
**Figure S74.** GPC curve of polymer in Table 4, entry 19.  
**Figure S75.** GPC curve of polymer in Table 4, entry 20.  
**Figure S76.** GPC curve of polymer in Table 4, entry 21.

- Figure S77.** GPC curve of polymer in Table 4, entry 22.
- Figure S78.** GPC curve of polymer in Table 4, entry 23.
- Figure S79.** GPC curve of polymer in Table 5, entry 1.
- Figure S80.** GPC curve of polymer in Table 5, entry 2.
- Figure S81.** GPC curve of polymer in Table 5, entry 3.
- Figure S82.** GPC curve of polymer in Table 5, entry 4
- Figure S83.** GPC curve of polymer in Table 5, entry 5.
- Figure S84.** GPC curve of polymer in Table 5, entry 6
- Figure S85.** *In situ*  $^1\text{H}$  NMR spectra of **3a**/PA mixture with a molar ratio of 1 : 0.3 in Toluene-*d*8.
- Figure S86.** *In situ*  $^1\text{H}$  NMR spectra of **3b**/PA mixture with a molar ratio of 1 : 0.3 in Toluene-*d*8.
- Figure S87.** FT-IR spectrum of PA, **3b** and the **3b**/PA mixture with a molar ratio of 1 : 0.3.
- Figure S88.** High resolution ESI-MS spectra of oligomer obtained from PA polymerization by use of **3b** under the PA: **3b** molar ratio 5: 1.
- Table S1.** X-ray diffraction experimental details for complexes **1a** and **(1-4)b**.

## EXPERIMENTAL SECTION

### Materials.

All manipulations of air- and moisture-sensitive and polymerization of phenylacetylene in organic solvents were performed under a dry nitrogen atmosphere by use of standard Schlenk techniques. Nitrogen was purchased from Beijing AP Beifen Gases Industrial Co., Ltd. Anhydrous toluene and THF were purified by use of a SPS-800 solvent purification system (Mbraun). (S)-1-phenylethan-1-amine, 2-hydroxybenzaldehyde, [Rh(cod)(Cl)]<sub>2</sub>, [Rh(nbd)(Cl)]<sub>2</sub>, 1,4-dimethoxybenzene, 3,3'-dimethoxy-[1,1'-biphenyl]-4,4'-diamine, naphthalene-1,5-diol, Br<sub>2</sub>, acetic acid, petroleum ether, LiBu, THF, NH<sub>4</sub>Cl, ethyl acetate, CH<sub>2</sub>Cl<sub>2</sub>, BBr<sub>3</sub>, petroleum ether, ethanol, KOH, Na<sub>2</sub>SO<sub>4</sub>, HCl, NaNO<sub>2</sub>, KI, CH<sub>3</sub>I, DMF and phenylacetylene were purchased from Energy Chemistry. DMF was distilled from CaH<sub>2</sub> to get rid of moisture and stored in a brown bottle. Phenylacetylene was purified by vacuum distillation prior to polymerization experiments. CDCl<sub>3</sub> (99.8 atom% D) and DMSO (99.8 atom% D) were purchased from Cambridge Isotope.

### Measurements.

The <sup>1</sup>H, <sup>13</sup>C NMR spectra of Rh complexes were recorded on an AVANCE 400 spectrometer at room temperature with CDCl<sub>3</sub> as a solvent. The microstructures of poly(phenylacetylene)s were obtained by <sup>1</sup>H NMR spectra in CDCl<sub>3</sub> at room temperature on an AVANCE 400 spectrometer. The molecular weights and molecular weight distributions (*M<sub>w</sub>/M<sub>n</sub>*) of poly(phenylacetylene)s were determined by GPC with a HLC-8320GPC apparatus in THF at 30 °C, calibrated with polystyrene standards.

### X-ray Crystallographic Study.

Suitable single crystals of complexes were sealed in a thin-walled glass capillary for determining the single-crystal structure. Data collection was performed at -100 °C on a Bruker SMART diffractometer with graphite-monochromated Mo K $\alpha$  radiation ( $\lambda = 0.71073$  Å). The SMART program package was used to determine the unit-cell parameters. The absorption correction was applied by using SADABS. The structures were solved by direct methods and refined on F2 by full-matrix least-squares techniques with anisotropic thermal parameters for non-hydrogen atoms. Hydrogen atoms were placed at calculated positions and were included in the structure calculation without further refinement of the parameters. All calculations were carried out using the SHELXS-97 program. Molecular structures were generated using ORTEP program. Crystallographic data (excluding structure factors) have been deposited with the Cambridge Crystallographic Data Centre as supplementary publication nos. CCDC-1527538 (**1a**), CCDC-1527537 (**1b**), CCDC-1527937 (**2b**), CCDC-1527936 (**3b**) and CCDC-1527938 (**4b**) and contain supplementary crystallographic data for this paper. These data can be obtained free of charge from The Cambridge Crystallographic Data Centre via [www.ccdc.cam.ac.uk/data\\_request/cif](http://www.ccdc.cam.ac.uk/data_request/cif).

### Scheme S1. Synthesis of (*S,E*)-2-(((1-phenylethyl)imino)methyl)phenol ligand **L1**.

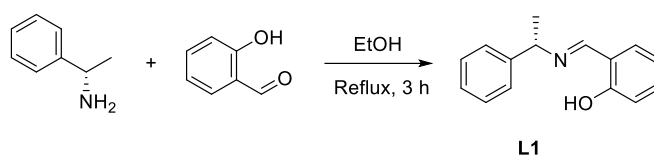

To a 50 ml flask with (*S*)-1-phenylethan-1-amine (1.2 g, 0.01 mol) and 2-hydroxybenzaldehyde (1.2 g, 0.01 mol), 20 ml ethanol was added. After refluxing for 3 h, the mixture cooled to room temperature and filtrated. Then the residue was washed with cold ethanol and evacuated to obtain yellow solid **L1** (2.2 g, Yield: 98%). <sup>1</sup>H NMR (400 MHz, CDCl<sub>3</sub>) δ 13.54 (s, 1H), 8.41 (s, 1H), 7.36 (s, 3H), 7.33 – 7.20 (m, 4H), 6.96 (d, *J* = 8.3 Hz, 1H), 6.87 (t, *J* = 7.4 Hz, 1H), 4.55 (q, *J* = 6.6 Hz, 1H), 1.63 (d, *J* = 6.6 Hz, 3H).

### Scheme S2. Synthesis of 4,4'-bis(*E*)-(((*S*)-1-phenylethyl)imino)methyl)-[1,1'-biphenyl]-3,3'-diol ligand **L2**.

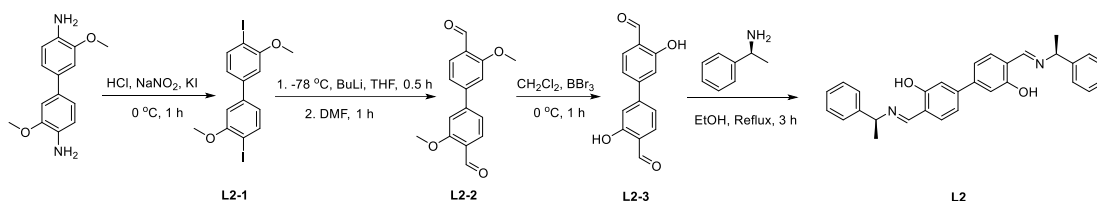

#### Synthesis of 4-iodo-3,3'-dimethoxy-4'-methyl-1,1'-biphenyl (**L2-1**)

To 12.2 g 3,3'-dimethoxy-[1,1'-biphenyl]-4,4'-diamine in 200 mL HCl (1 mol/L), 6.9 g NaNO<sub>2</sub> (100 mmol) in water was added at 0°C. Then 20 g KI (120 mol) in water was added. After reaction for 1 h, the mixture was extracted with ethyl acetate, dried with anhydrous Na<sub>2</sub>SO<sub>4</sub>, and removed solvent under reduced pressure to afford crude ligand. Gray solid 4,4'-diiodo-3,3'-dimethoxy-1,1'-biphenyl was obtained after purified using chromatography (silica gel, petroleum ether/ethyl acetate) (14.7 g, 62%). <sup>1</sup>H NMR (400 MHz, CDCl<sub>3</sub>) δ 7.82 (d, *J* = 8.0 Hz, 2H), 6.96 (d, *J* = 1.9 Hz, 2H), 6.91 (dd, *J* = 8.0, 2.0 Hz, 2H), 3.95 (s, 6H).

#### Synthesis of 3,3'-dimethoxy-[1,1'-biphenyl]-4,4'-dicarbaldehyde (**L2-2**)

At -78 °C, 12 mL LiBu (2.5 mol/L, 30 mmol) was slowly added to the 100 mL THF solution of 14.7 g 4,4'-diiodo-3,3'-dimethoxy-1,1'-biphenyl (30 mmol) in a 250 ml flask and the mixture reacted for 30 min. Then 30 mL DMF was added. After warming to room temperature, the mixture continued to react for 1 h. Then the mixture was treated with 30 mL aqueous solution of NH<sub>4</sub>Cl and was stirred for 5 min. After extracted with ethyl acetate and removed solvent, the residue was recrystallized from petroleum ether and ethyl acetate to afford white solid 3,3'-dimethoxy-[1,1'-biphenyl]-4,4'-dicarbaldehyde (3.5 g, Yield: 41%). <sup>1</sup>H NMR (400 MHz, DMSO) δ 10.40 (s, 2H), 7.81 (d, *J* = 8.0 Hz, 2H), 7.54 (s, 2H), 7.50 (d, *J* = 8.0 Hz, 2H), 4.05 (s, 6H).

#### Synthesis of 3,3'-dihydroxy-[1,1'-biphenyl]-4,4'-dicarbaldehyde (**L2-3**)

To 4.5 g 3,3'-dimethoxy-[1,1'-biphenyl]-4,4'-dicarbaldehyde (13 mmol) in 40 mL CH<sub>2</sub>Cl<sub>2</sub>, 16.2 g BBr<sub>3</sub> (65 mmol) was added at 0°C. After reaction for 1 h, the mixture was treated with 100 mL ice water. The organic solvent was removed by vacuo. Then the mixture was filtered and the residue was washed with water and petroleum ether. Insoluble light yellow solid

3,3'-dihydroxy-[1,1'-biphenyl]-4,4'-dicarbaldehyde was obtained (1.95 g, 62%).

### Synthesis of 4,4'-bis(*E*)-(((*S*)-1-phenylethyl)imino)methyl)-[1,1'-biphenyl]-3,3'-diol (**L2**)

The synthetic procedure was the same with that of compound **L1** (2.55 g, Yield: 72%). <sup>1</sup>H NMR (400 MHz, CDCl<sub>3</sub>) δ 13.64 (s, 2H), 8.44 (s, 2H), 7.41 – 7.36 (m, 8H), 7.33 – 7.26 (m, 2H), 7.22 (d, *J* = 1.6 Hz, 2H), 7.13 (dd, *J* = 8.0, 1.7 Hz, 2H), 4.58 (q, *J* = 6.6 Hz, 2H), 1.65 (d, *J* = 6.7 Hz, 6H, CH<sub>3</sub>). <sup>13</sup>C NMR (100 MHz, CDCl<sub>3</sub>) δ 163.00 (s), 161.32 (s), 144.17 (s), 143.78 (s), 131.72 (s), 128.71 (s), 127.30 (s), 126.42 (s), 118.39 (s), 117.67 (s), 115.58 (s), 77.28 (d, *J* = 11.7 Hz), 77.02 (s), 76.70 (s), 68.54 (s), 24.94 (s), 0.01 (s).

### Scheme S3. Synthesis of 2,5-bis(*E*)-(((*S*)-1-phenylethyl)imino)methyl)benzene-1,4-diol ligand **L3**.

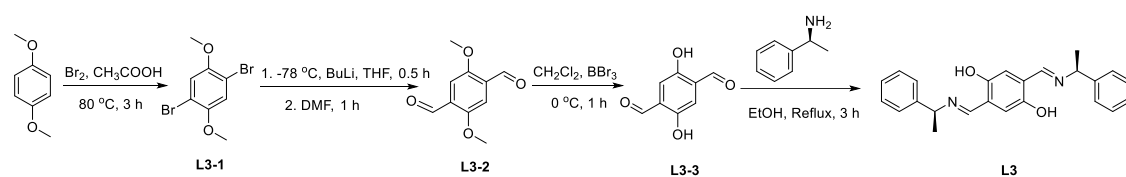

### Synthesis of 1,4-dibromo-2,5-dimethoxybenzene (**L3-1**)

In a 500 mL flask, 32 g Br<sub>2</sub> (200 mmol) in 30 mL acetic acid was added to 13.8 g 1,4-dimethoxybenzene (100 mmol) in 200 mL acetic acid at 80 °C. After reaction for 3 h, the mixture cooled to room temperature and acetic acid was removed by vacuo. Then the residue was washed with water and petroleum ether, affording light yellow solid 1,4-dibromo-2,5-dimethoxybenzene (20.6 g, Yield: 70%). <sup>1</sup>H NMR (400 MHz, CDCl<sub>3</sub>) δ 7.10 (s, 2H), 3.84 (s, 6H).

### Synthesis of 2,5-dimethoxyterephthalaldehyde (**L3-2**)

The synthetic procedure was the same with that of compound **L2-2** (white solid, 3.95 g, Yield: 51%). <sup>1</sup>H NMR (400 MHz, CDCl<sub>3</sub>) δ 10.50 (s, 2H), 7.46 (s, 2H), 3.94 (s, 6H).

### Synthesis of 2,5-dihydroxyterephthalaldehyde (**L3-3**)

The synthetic procedure was the same with that of compound **L2-3** (yellow solid, 0.95 g, 38%).

### Synthesis of 2,5-bis(*E*)-(((*S*)-1-phenylethyl)imino)methyl)benzene-1,4-diol (**L3**)

The synthetic procedure was the same with that of compound **L1** (yellow solid, 1.44 g, Yield: 68%). <sup>1</sup>H NMR (400 MHz, CDCl<sub>3</sub>) δ 12.66 (s, 2H), 8.30 (s, 2H), 7.28 (s, 8H), 7.19 (s, 3H), 6.79 (s, 2H), 4.49 (d, *J* = 5.9 Hz, 2H), 1.57 (d, *J* = 5.8 Hz, 6H). <sup>13</sup>C NMR (100 MHz, CDCl<sub>3</sub>) δ 162.91 (s), 152.73 (s), 143.58 (s), 128.74 (s), 127.38 (s), 126.44 (s), 121.48 (s), 118.31 (s), 68.97 (s).

### Scheme S4. Synthesis of 2,6-bis(*E*)-((1-phenylethyl)imino)methyl)naphthalene-1,5-diol ligand **L4**.



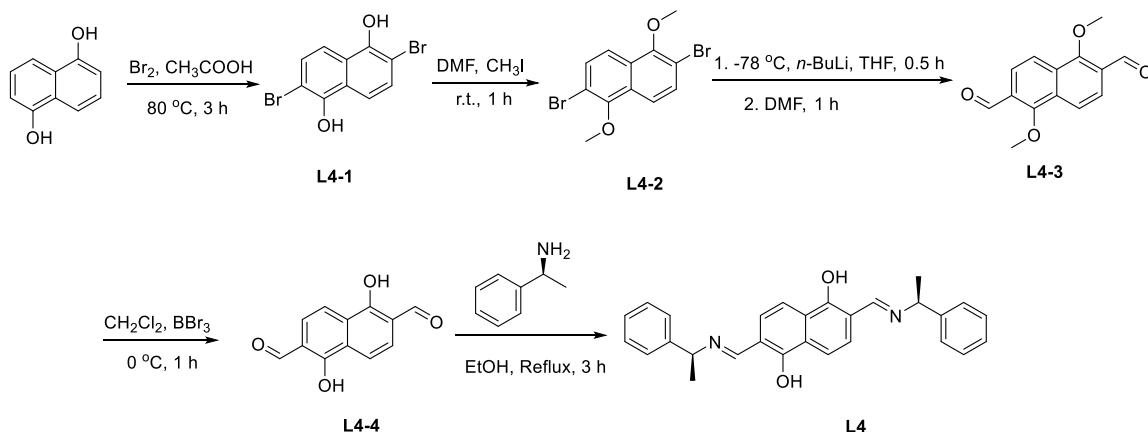

#### Synthesis of 2,6-dibromonaphthalene-1,5-diol (L4-1)

The synthetic procedure was the same with that of compound **L3-1** (10.1 g, Yield: 80%). <sup>1</sup>H NMR (400 MHz, CDCl<sub>3</sub>) δ 7.69 (d, *J* = 9.0 Hz, 2H), 7.49 (d, *J* = 9.0 Hz, 2H), 5.97 (s, 2H).

#### Synthesis of 2,6-dibromo-1,5-dimethoxynaphthalene (L4-2)

To 100 mL DMF solution of 10.1 g 2,6-dibromonaphthalene-1,5-diol (32 mmol) in a 250 mL flask, 10.8 CH<sub>3</sub>I (76 mmol) was added. After reaction for 1 h, the mixture was treated with 100 mL water. The precipitated solid 2,6-dibromo-1,5-dimethoxynaphthalene was filtered and dried by vacuo (4.9 g, 45%). <sup>1</sup>H NMR (400 MHz, CDCl<sub>3</sub>) δ 7.78 (d, *J* = 8.9 Hz, 2H), 7.63 (d, *J* = 8.9 Hz, 2H), 3.99 (s, 6H).

#### Synthesis of 1,5-dimethoxynaphthalene-2,6-dicarbaldehyde (L4-3)

The synthetic procedure was the same with that of compound **L2-2** (yellow solid, 2.8 g, Yield: 82%). <sup>1</sup>H NMR (400 MHz, CDCl<sub>3</sub>) δ 10.62 (s, 2H), 8.09 (d, *J* = 8.7 Hz, 2H), 7.97 (d, *J* = 8.7 Hz, 2H), 4.15 (s, 6H).

#### Synthesis of 1,5-dihydroxynaphthalene-2,6-dicarbaldehyde (L4-4)

The synthetic procedure was the same with that of compound **L2-3** (yellow solid, 2.3 g, 93%). <sup>1</sup>H NMR (400 MHz, CDCl<sub>3</sub>) δ 12.42 (s, 2H), 10.06 (s, 2H), 8.00 (d, *J* = 8.6 Hz, 2H), 7.61 (d, *J* = 8.6 Hz, 2H).

#### Synthesis of 2,6-bis((E)-((1-phenylethyl)imino)methyl)naphthalene-1,5-diol (L4)

The synthetic procedure was the same with that of compound **L1** (4.2g, Yield: 95%). <sup>1</sup>H NMR (400 MHz, CDCl<sub>3</sub>) δ 14.48 (s, 2H), 8.21 (d, *J* = 4.4 Hz, 2H), 7.66 (d, *J* = 8.6 Hz, 2H), 7.40 – 7.37 (m, 6H), 7.29 (ddd, *J* = 8.3, 5.7, 2.9 Hz, 2H), 7.12 (d, *J* = 8.7 Hz, 2H), 4.68 (q, *J* = 6.4 Hz, 2H), 1.71 (d, *J* = 6.8 Hz, 6H). <sup>13</sup>C NMR (100 MHz, CDCl<sub>3</sub>) δ 167.00 (s), 162.24 (s), 142.72 (s), 129.93 (s), 128.93 (s), 127.72 (s), 126.79 (s), 126.42 (s), 113.31 (s), 112.05 (s), 77.30 (d, *J* = 11.5 Hz), 77.04 (s), 64.81 (s).

#### Scheme S5 Synthesis of Rh Complex 1

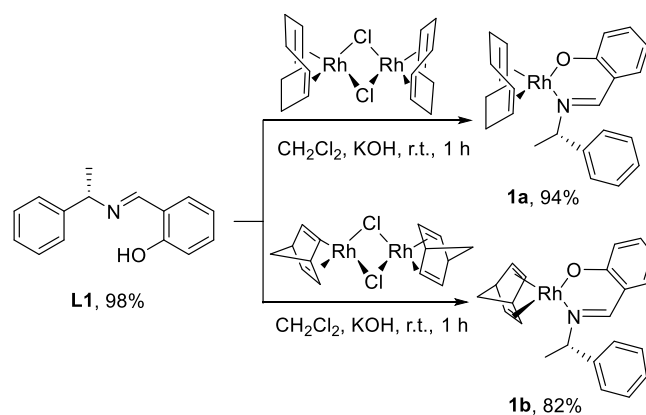

### Synthesis of Rh complexes 1a

**L1** (44 mg, 2 mmol) and  $[\text{Rh}(\text{cod})(\text{Cl})_2]$  (53 mg, 1 mmol) in 5 mL  $\text{CH}_2\text{Cl}_2$  were stirred for 10 min at room temperature. Then 180 mg KOH in 2 mL water was added. The reaction mixture was stirred for 1 h. Then the mixture was extracted with  $\text{CH}_2\text{Cl}_2$ , dried over anhydrous  $\text{Na}_2\text{SO}_4$  and removed solvent by vacuo, obtaining yellow solid. The single crystal of complex **1a** was grown from  $\text{CH}_2\text{Cl}_2$  and n-hexane at  $-26^\circ\text{C}$  for 18 h (87 mg, Yield: 94%).  $^1\text{H}$  NMR (400 MHz,  $\text{CDCl}_3$ )  $\delta$  7.86 (d,  $J = 1.6$  Hz, 1H), 7.39 – 7.32 (m, 3H), 7.26 (qd,  $J = 6.0, 2.1$  Hz), 6.96 (dd,  $J = 7.9, 1.6$  Hz), 6.84 (d,  $J = 8.5$  Hz), 6.47 (dd,  $J = 10.8, 3.9$  Hz), 4.69 – 4.53 (m, 2H), 4.50 – 4.39 (q,  $J = 6.9$  Hz, 1H), 3.80 (d,  $J = 6.7$  Hz, 2H), 2.62 – 2.37 (m, 4H), 1.93 (m, 4H), 1.65 (d,  $J = 6.9$  Hz, 3H).  $^{13}\text{C}$  NMR (100 MHz,  $\text{CDCl}_3$ )  $\delta$  165.64 (s), 165.08 (s), 142.83 (s), 135.13 (s), 134.62 (s), 128.65 (s), 127.60 (s), 127.37 (s), 85.29 (d,  $J = 11.9$  Hz), 84.94 (d,  $J = 12.0$  Hz), 73.16 (d,  $J = 14.2$  Hz), 71.04 (d,  $J = 14.2$  Hz), 59.81 (s), 32.08 (s), 31.65 (s), 29.19 (s), 28.79 (s), 22.14 (s).

### Synthesis of Rh complexes 1b

The synthetic procedures used is similar to that described for complex **1a**, starting from **L1** (44 mg, 2 mmol) and  $[\text{Rh}(\text{nbd})(\text{Cl})_2]$  (49 mg, 1 mmol). Complex **1b** was obtained as yellow solid. The single crystal of complex **1b** was isolated from a concentrated mixture solution of  $\text{CH}_2\text{Cl}_2$  and MeOH at  $-26^\circ\text{C}$  for 18 h (73 mg, Yield: 82%).  $^1\text{H}$  NMR (400 MHz,  $\text{CDCl}_3$ )  $\delta$  7.87 (d,  $J = 2.2$  Hz, 1H), 7.39 – 7.33 (m, 4H), 7.29 (dd,  $J = 6.8, 3.3$  Hz, 1H), 7.02 (dd,  $J = 7.9, 1.8$  Hz, 1H), 6.90 (d,  $J = 8.6$  Hz, 1H), 6.58 – 6.47 (m, 1H), 4.40 (d,  $J = 14.7$  Hz, 2H), 4.25 (q,  $J = 6.8$  Hz, 1H), 3.78 (d,  $J = 20.5$  Hz, 2H), 3.52 (dd,  $J = 26.1, 2.9$  Hz, 2H), 1.63 – 1.55 (m, 3H), 1.41 – 1.30 (m, 2H).  $^{13}\text{C}$  NMR (100 MHz,  $\text{CDCl}_3$ )  $\delta$  166.00 (s), 162.68 (s), 142.41 (s), 135.23 (s), 134.40 (s), 128.63 (s), 127.44 (s), 121.34 (s), 119.22 (s), 114.56 (s), 62.65 (d,  $J = 9.2$  Hz), 62.33 (s), 61.91 (s), 61.46 (s), 51.98 (s), 50.71 (s), 49.42 (s), 49.29 (s), 21.94 (s).

### Scheme S6 Synthesis of Rh Complexes 2.

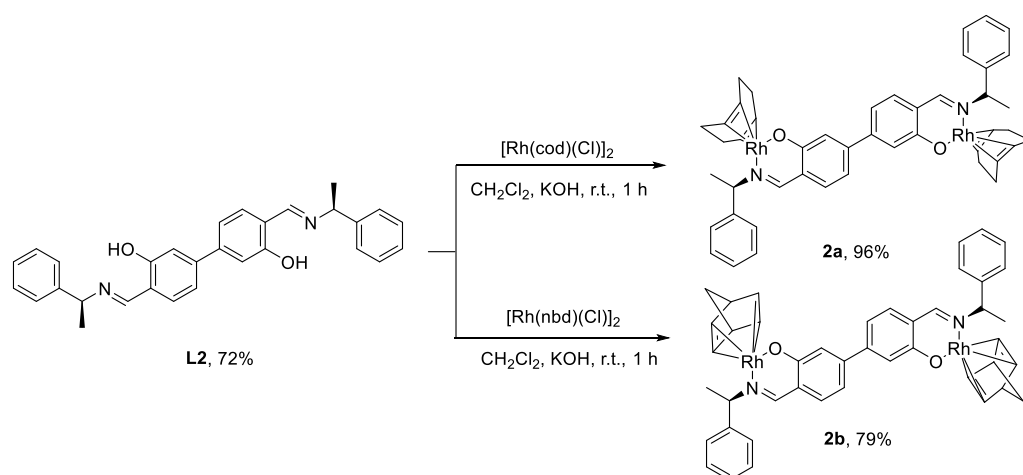

### Synthesis of Rh complexes **2a**

Stirred for 10 min at room temperature, 4 mL aqueous solution of  $\text{KOH}$  (360 mg) was added to the mixture of **L2** (45 mg, 1 mmol) and  $[\text{Rh}(\text{cod})(\text{Cl})]_2$  (50 mg, 1 mmol) in 5 mL  $\text{CH}_2\text{Cl}_2$ . After reacting for 1 h, the mixture was extracted with  $\text{CH}_2\text{Cl}_2$  (anhydrous  $\text{Na}_2\text{SO}_4$  as desiccant) and removed solvent by vacuo. Yellow solid was obtained (81 mg, Yield: 96%).  $^1\text{H}$  NMR (400 MHz,  $\text{CDCl}_3$ )  $\delta$  7.86 (s, 2H), 7.36 (dd,  $J = 8.6, 5.3$  Hz, 8H), 7.12 (d,  $J = 1.3$  Hz, 4H), 6.98 (d,  $J = 8.3$  Hz, 2H), 6.77 (dd,  $J = 8.2, 1.6$  Hz, 2H), 4.69 – 4.54 (m, 4H), 4.44 (q,  $J = 6.8$  Hz, 2H), 3.79 (s, 4H), 2.63 – 2.35 (m, 8H), 2.08 – 1.83 (m, 8H), 1.66 (d,  $J = 6.8$  Hz, 6H).  $^{13}\text{C}$  NMR (100 MHz,  $\text{CDCl}_3$ )  $\delta$  165.44 (s), 164.49 (s), 147.74 – 146.35 (m), 142.90 (s), 135.19 (s), 128.63 (s), 127.57 (s), 127.32 (s), 119.54 (s), 118.82 (s), 113.75 (s), 85.30 (d,  $J = 11.9$  Hz), 84.97 (d,  $J = 11.9$  Hz), 73.12 (d,  $J = 14.2$  Hz), 71.01 (d,  $J = 14.2$  Hz), 59.75 (s), 32.06 (s), 31.63 (s), 29.19 (s), 28.79 (s), 22.12 (s).

### Synthesis of Rh complexes **2b**

The synthetic procedure used was similar to that described for complex **2a**, starting from **L2** (45 mg, 1 mmol) and  $[\text{Rh}(\text{nbd})(\text{Cl})]_2$  (92 mg, 2 mmol). Complex **2b** was obtained as yellow solid. The single crystal of complex **2b** was isolated from a concentrated mixture solution of  $\text{CH}_2\text{Cl}_2$  and *n*-hexane at  $-26$  °C for 18 h (64 mg, Yield: 79%).  $^1\text{H}$  NMR (400 MHz,  $\text{CDCl}_3$ )  $\delta$  7.87 (s, 2H), 7.39 – 7.26 (m, 8H), 7.18 (s, 2H), 7.03 (d,  $J = 8.3$  Hz, 2H), 6.83 (dd,  $J = 8.3, 1.6$  Hz, 2H), 4.39 (d,  $J = 16.0$  Hz, 4H), 4.24 (q,  $J = 6.9$  Hz, 2H), 3.78 (d,  $J = 20.8$  Hz, 4H), 3.51 (d,  $J = 25.4$  Hz, 4H), 1.66 – 1.54 (m, 6H), 1.34 (q,  $J = 8.5$  Hz, 4H).  $^{13}\text{C}$  NMR (100 MHz,  $\text{CDCl}_3$ )  $\delta$  165.85 (s), 162.10 (s), 146.48 (s), 142.49 (s), 135.31 (s), 128.63 (s), 127.44 (d,  $J = 5.5$  Hz), 119.55 (s), 118.69 (s), 114.09 (s), 62.64 (s), 62.33 (s), 61.89 – 61.86 (m), 61.48 – 61.32 (m), 51.93 (s), 50.62 (d,  $J = 11.5$  Hz), 49.38 (d,  $J = 13.0$  Hz), 21.96 (s).

### Scheme S7. Synthesis of Rh Complexes **3**.

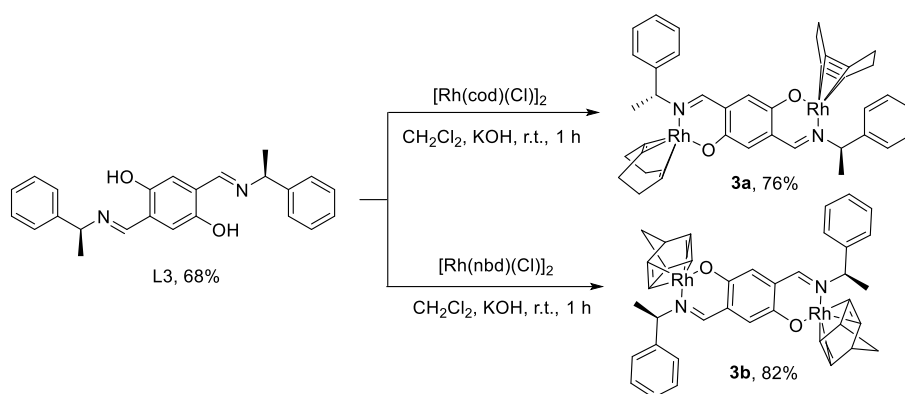

### Synthesis of Rh complexes 3a

To the mixture of **L3** (38 mg, 1 mmol),  $[\text{Rh}(\text{cod})(\text{Cl})]_2$  (100 mg, 2 mmol) and 5 mL  $\text{CH}_2\text{Cl}_2$  stirred for 10 min at room temperature, 4 mL KOH (360 mg) aqueous solution was added. The mixture continued to react for 1 h and then was extracted with  $\text{CH}_2\text{Cl}_2$  (anhydrous  $\text{Na}_2\text{SO}_4$  as desiccant). purple solid was obtained after removing solvent by vacuo (61 mg, 76 %).  $^1\text{H}$  NMR (400 MHz,  $\text{CDCl}_3$ )  $\delta$  7.84 (d,  $J = 1.4$  Hz, 2H), 7.43 – 7.10 (m, 10H), 6.54 (s, 2H), 4.54 (t,  $J = 7.2$  Hz, 2H), 4.44 (dd,  $J = 12.9, 6.2$  Hz, 4H), 3.81 – 3.64 (m, 4H), 2.61 – 2.32 (m, 8H), 2.06 – 1.78 (m, 8H), 1.63 (d,  $J = 6.8$  Hz, 6H).  $^{13}\text{C}$  NMR (100 MHz,  $\text{CDCl}_3$ )  $\delta$  166.00 (s), 154.34 (s), 142.44 (s), 128.63 (s), 127.59 (s), 127.48 (s), 126.57 (s), 123.35 (s), 85.81 (d,  $J = 12.1$  Hz), 85.39 (d,  $J = 12.0$  Hz), 72.58 (d,  $J = 14.0$  Hz), 70.13 (d,  $J = 14.0$  Hz), 60.33 (s), 32.13 (s), 31.59 (s), 29.23 (s), 28.70 (s), 22.14 (s).

### Synthesis of Rh complexes 3b

The synthetic procedures used is similar to that described for complex **3a**, starting from **L3** (38 mg, 1 mmol) and  $[\text{Rh}(\text{nbd})(\text{Cl})]_2$  (92 mg, 2 mmol). Complex **3b** was obtained as purple solid. The single crystal of complex **3b** was isolated from a concentrated mixture solution of  $\text{CH}_2\text{Cl}_2$  and n-hexane at  $-26$  °C for 18 h (62 mg, Yield: 82%).  $^1\text{H}$  NMR (400 MHz,  $\text{CDCl}_3$ )  $\delta$  7.82 (d,  $J = 1.9$  Hz, 2H), 7.27 (tt,  $J = 8.3, 7.0$  Hz, 10H), 6.63 (s, 2H), 4.32 (d,  $J = 18.4$  Hz, 4H), 4.23 (q,  $J = 6.8$  Hz, 2H), 3.75 (d,  $J = 24.2$  Hz, 4H), 3.54 – 3.39 (m, 4H), 1.56 (d,  $J = 6.9$  Hz, 6H), 1.32 (s, 4H).  $^{13}\text{C}$  NMR (100 MHz,  $\text{CDCl}_3$ )  $\delta$  163.55 (s), 155.04 (s), 141.90 (s), 128.76 (s), 127.72 (d,  $J = 2.6$  Hz), 126.30 (s), 123.72 (s), 63.06 (d,  $J = 9.2$  Hz), 62.74 (s), 62.64 (s), 61.56 (d,  $J = 6.2$  Hz), 51.17 (s), 51.04 (s), 49.80 (s), 49.69 (s), 49.54 (d,  $J = 2.5$  Hz), 49.31 (d,  $J = 2.5$  Hz), 22.07 (s).

### Scheme S8. Synthesis of Rh Complexes 4.

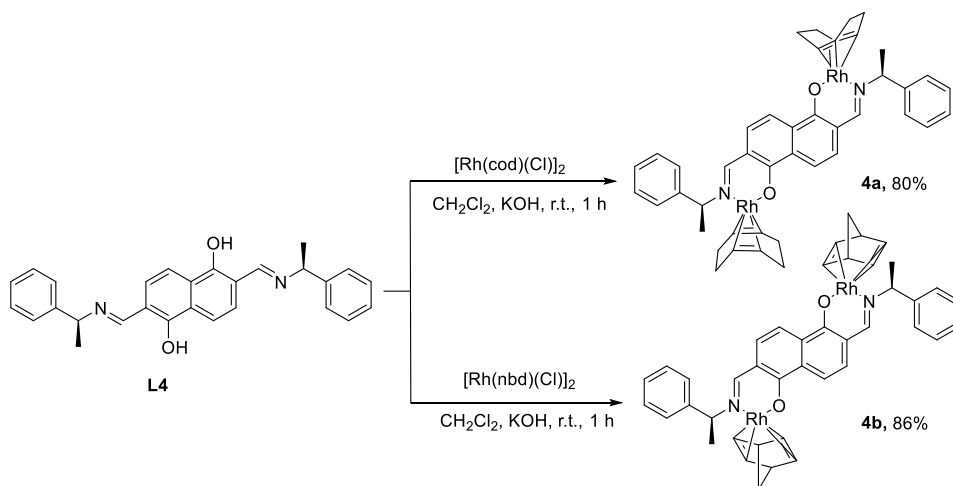

### Synthesis of Rh complexes **4a**

At room temperature, **L4** (43 mg, 1 mmol) and  $[\text{Rh}(\text{cod})(\text{Cl})_2]$  (100 mg, 2 mmol) in 5 mL  $\text{CH}_2\text{Cl}_2$  was stirred for 10 min. Then 4 mL aqueous solution of 360 mg KOH water was added. The mixture was extracted with  $\text{CH}_2\text{Cl}_2$  and dried over anhydrous  $\text{Na}_2\text{SO}_4$  after reaction for 1 h. Removal of solvent by vacuo gave yellow solid (67 mg, Yield: 80%).  $^1\text{H}$  NMR (400 MHz,  $\text{CDCl}_3$ )  $\delta$  7.97 (s, 1H), 7.53 (d,  $J = 8.8$  Hz, 2H), 7.44 – 7.36 (m, 10H), 6.88 (d,  $J = 8.8$  Hz, 2H), 4.94 – 4.76 (m, 4H), 4.48 (q,  $J = 6.6$  Hz, 2H), 3.89 (s, 4H), 2.73 – 2.43 (m, 8H), 1.99 (dd,  $J = 21.9, 10.8$  Hz, 8H), 1.70 (d,  $J = 6.7$  Hz, 6H).  $^{13}\text{C}$  NMR (100 MHz,  $\text{CDCl}_3$ )  $\delta$  164.51 (s), 163.35 (s), 143.10 (s), 131.64 (s), 129.06 (s), 128.61 (s), 127.64 (s), 127.26 (s), 114.91 (s), 111.23 (s), 84.77 (d,  $J = 12.0$  Hz), 84.33 (d,  $J = 11.8$  Hz), 73.49 (d,  $J = 14.3$  Hz), 71.38 (d,  $J = 14.5$  Hz), 59.83 (s), 32.14 (s), 31.73 (s), 29.07 (s), 28.69 (s), 22.25 (s).

### Synthesis of Rh complexes **4b**

The synthetic procedure used for is similar to that described for complex **4a**, starting from **L4** (43 mg, 1 mmol) and  $[\text{Rh}(\text{nbd})(\text{Cl})_2]$  (92 mg, 2 mmol). Complex **4b** was obtained as yellow solid. The single crystal of complex **4b** was isolated from a concentrated mixture solution of  $\text{CH}_2\text{Cl}_2$  and n-hexane at  $-26$  °C for 18 h (70 mg, Yield: 86%).  $^1\text{H}$  NMR (400 MHz,  $\text{CDCl}_3$ )  $\delta$  7.95 (s, 2H), 7.56 (d,  $J = 8.8$  Hz, 2H), 7.39 – 7.29 (m, 10H), 6.91 (d,  $J = 8.8$  Hz, 2H), 4.44 (d,  $J = 17.8$  Hz, 4H), 4.28 (q,  $J = 6.8$  Hz, 2H), 3.78 (d,  $J = 19.5$  Hz, 4H), 3.53 (t,  $J = 19.5$  Hz, 4H), 1.67 – 1.58 (m, 6H), 1.35 (q,  $J = 8.6$  Hz, 4H).  $^{13}\text{C}$  NMR (100 MHz,  $\text{CDCl}_3$ )  $\delta$  163.86 (s), 162.02 (s), 142.81 (s), 131.46 (s), 129.31 – 129.12 (m), 128.58 (s), 127.50 (s), 127.29 (s), 114.72 (s), 111.62 (s), 62.36 (s), 62.25 (s), 61.98 (d,  $J = 8.9$  Hz), 61.41 (d,  $J = 6.1$  Hz), 52.46 (s), 52.34 (s), 51.27 (s), 51.15 (s), 49.39 (s), 49.27 (s), 22.11 (s).

### Scheme S9. Synthesis of 4-ethynyl-4'-(1,2,2-triphenylvinyl)-1,1'-biphenyl (TPA).

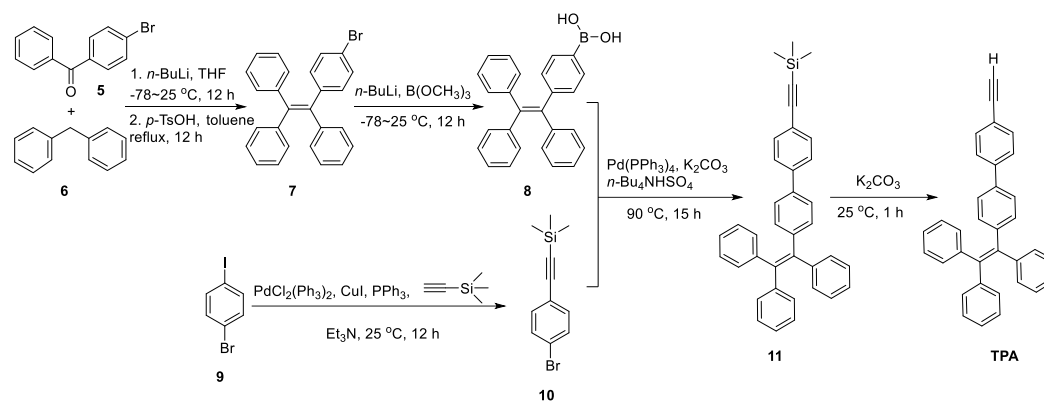

**Synthesis of (2-(4-bromophenyl)ethene-1,1,2-triyl)tribenzene (7):** Under nitrogen atmosphere, compound **6** (8.60 g, 51 mmol) was dissolved in 50 mL of dry THF, after the solution was cooled to  $-78\text{ }^{\circ}\text{C}$ , *n*-BuLi (35 mL, 1.6 M in hexane) was added dropwise and the resulting mixture was stirred at  $-10\text{ }^{\circ}\text{C}$  for 2 h, then compound **5** (11.1 g, 42.4 mmol) was added dropwise and the mixture was allowed to warm to room temperature and stirred for 10 h. Then the reaction mixture was quenched with an aqueous solution of ammonium chloride, extracted with CH<sub>2</sub>Cl<sub>2</sub> (3 × 100 mL), the combined organic layers were dried over anhydrous Na<sub>2</sub>SO<sub>4</sub> and evaporated to remove the solvent. The residue was dissolved in toluene (100 mL), *p*-toluene sulfonic acid (1.06 g, 6.20 mmol) was added, the resulting mixture was refluxed for 12 h. After the reaction mixture was cooled to room temperature, the solvent was removed under reduced pressure, the residue was purified by column chromatography (silica gel, 20:1 hexane to ethyl acetate, v/v) to afford the desired compound **7** as a white solid (11.7 g, 68% yield). <sup>1</sup>H NMR (400 MHz, CDCl<sub>3</sub>):  $\delta$  6.89 (d, *J* = 8.2 Hz, 2H), 7.08 (m, 15H), 7.22 (d, *J* = 8.2 Hz, 2H).

**Synthesis of (4-(1,2,2-triphenylvinyl)phenyl)boronic acid (8):** Under nitrogen atmosphere, compound **7** (2 g, 4.86 mmol) was dissolved in 20 mL of dry THF, after the solution was cooled to  $-78\text{ }^{\circ}\text{C}$ , *n*-BuLi (2.43 mL, 2.4 M in hexane) was added dropwise and the mixture was stirred at  $-78\text{ }^{\circ}\text{C}$  for 30 min. Then a solution of trimethyl borate (0.76 g, 7.29 mmol) in dry THF (10 mL) was added dropwise, the resulting mixture was stirred at  $-78\text{ }^{\circ}\text{C}$  for 30 min, then allowed to warm to room temperature and stirred for 11 h. The reaction mixture was quenched with 10% hydrogen chloride aqueous solution, extracted with ethyl acetate (3 × 30 mL), the combined organic layers were dried over anhydrous Na<sub>2</sub>SO<sub>4</sub> and concentrated under reduced pressure to afford crude compound **8** as white solid (2.40 g, crude), this compound was used directly for the next step without purification.

**Synthesis of ((4-bromophenyl)ethynyl)trimethylsilane (10):** Under nitrogen atmosphere, compound **9** (7.0 g, 25 mmol), PPh<sub>3</sub> (330 mg, 1.25 mmol), Pd(PPh<sub>3</sub>)<sub>2</sub>Cl<sub>2</sub> (630 mg, 0.9 mmol), CuI (240 mg, 1.25 mmol), and ethynyltrimethylsilane (7 mL, 50 mmol) were dissolved in 60 mL of Et<sub>3</sub>N. The reaction mixture was stirred at  $25\text{ }^{\circ}\text{C}$  for 12 hours. Finally, the mixture was filtered, washed with brine, dried using anhydrous magnesium sulfate, concentrated under reduced pressure, the residue was purified by column chromatography (silica gel, PE) to afford the desired compound **10** as a white solid (5.3 g, 85% yield). <sup>1</sup>H NMR (400 MHz, CDCl<sub>3</sub>):  $\delta$  7.43 (d, *J* = 7.8 Hz, 1H), 7.32 (d, *J* = 7.8 Hz, 1H), 0.25 (s, 4H).

**Synthesis of trimethyl((4'-(1,2,2-triphenylvinyl)-[1,1'-biphenyl]-4-yl)ethynyl)silane (11):** Under nitrogen atmosphere, compound **8** (5 g, crude), compound **10** (3.33 g, 8.9 mmol) were dissolved in a mixture solvents of toluene (100 mL) and water (50 mL), then Pd(PPh<sub>3</sub>)<sub>4</sub> (386 mg, 0.33 mmol), K<sub>2</sub>CO<sub>3</sub> (2.75 g, 19.9 mmol) and tetrabutylammonium hydrogen sulfate (452 mg, 1.33 mmol) were added, the resulting mixture was stirred at 90 °C for 15 h. after the reaction mixture was cooled to room temperature, the organic layer was separated and the aqueous phase was extracted with ethyl acetate (3 × 80 mL), the combined organic layers were dried over anhydrous Na<sub>2</sub>SO<sub>4</sub> and concentrated under reduced pressure, the residue was purified by column chromatography (silica gel, 2:1 hexane: ethyl acetate, v/v) to afford the desired compound **11** as a light yellow solid (6.5 g). <sup>1</sup>H NMR (400 MHz, CDCl<sub>3</sub>): δ 7.50 (s, 4H), 7.34 (dd, 2H), 7.18 – 7.00 (m, 17H), 0.28 (m, 9H).

**Synthesis of 4-ethynyl-4'-(1,2,2-triphenylvinyl)-1,1'-biphenyl (TPA):** Compound **11** (5.1 g, 10.1 mmol) and potassium carbonate (4.8 g, 20.2mmol) were dissolved in MeOH (50 mL) under an atmosphere of nitrogen, the resulting mixture was stirred at room temperature for 1 h. Finally, the mixture was filtered and concentrated under reduced pressure, the residue was purified by column chromatography (silica gel, PE) to afford the desired compound **TPA** as a pure yellow liquid (3.58 g, 82% yield). <sup>1</sup>H NMR (400 MHz, CDCl<sub>3</sub>): δ 7.51 (s, 4H), 7.33 (d, 2H), 7.13–7.01 (m, 17H), 3.11 (s, 1H).

**Scheme S10. Synthesis of (2-(dodecyloxy)-5-ethynyl-1,3-phenylene)dimethanol (HPA).**

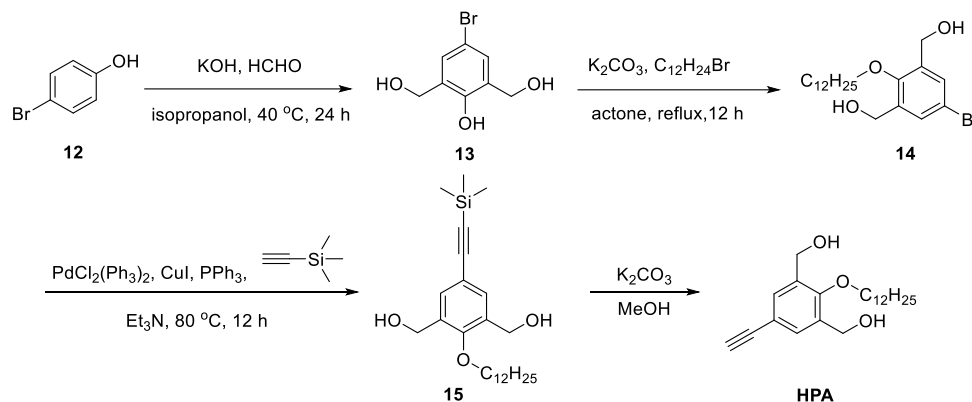

**Synthesis of (5-bromo-2-hydroxy-1,3-phenylene)dimethanol (13):** Under nitrogen atmosphere, compound **12** (20.4 g, 118 mmol) was dissolved in the solvents of isopropanol (50 mL), then KOH (9.5 g, 170 mmol) was added, then 37% formaldehyde solution (150 mL) was added, the resulting mixture was stirred at 40 °C for 24 h. After the reaction mixture was cooled to room temperature, then 0.1 mol/L HCl was slowly added the reaction mixture adjusting the PH to 2, the mixture stirred at room temperature overnight, the mixture was filtered to afford the desired compound **13** as a red solid (20.6 g, 75% yield ). <sup>1</sup>H NMR (400 MHz, DMSO-d<sub>6</sub>): δ 8.77 (s, 1H), 7.29 (s, 2H, aromatic), 5.34 (t, *J* = 5.4 Hz, 2H), 4.52 (d, *J* = 5.0 Hz, 4H).

**Synthesis of (5-bromo-2-(dodecyloxy)-1,3-phenylene)dimethanol (14):** Under nitrogen atmosphere, compound **13** (20.6 g, 88 mmol) was dissolved in the solvents of actone (200 mL), then K<sub>2</sub>CO<sub>3</sub> (12.2 g, 88 mmol), 1-Bromododecane (26 g, 106 mmol) were added, then the resulting mixture was refluxed for 12 h. After the reaction mixture was cooled to room

temperature, the mixture was filtered, washed with brine, dried using Na<sub>2</sub>SO<sub>4</sub>, concentrated under reduced pressure, the residue was purified by column chromatography (silica gel, PE) to afford the desired compound **14** as a white solid (24 g, 68% yield). <sup>1</sup>H NMR (400 MHz, CDCl<sub>3</sub>): δ 7.48 (s, 2H), 4.69 (d, *J* = 6.1 Hz, 4H), 3.84 (t, *J* = 6.6 Hz, 2H), 2.05 (t, *J* = 6.1 Hz, 2H), 1.87–1.71 (m, 2H), 1.50–1.11 (m, 18H), 0.88 (t, *J* = 6.8 Hz, 3H).

**Synthesis of (2-(dodecyloxy)-5-((trimethylsilyl)ethynyl)-1,3-phenylene)dimethanol (15):**

Under nitrogen atmosphere, compound **14** (8 g, 20 mmol), PPh<sub>3</sub> (52.4 mg, 0.2 mmol), Pd (PPh<sub>3</sub>)<sub>2</sub>Cl<sub>2</sub> (6.38 mg, 0.01 mmol), CuI (38 mg, 0.2 mmol), and ethynyltrimethylsilane (3 g, 30 mmol) were dissolved in 100 mL of Et<sub>3</sub>N. The reaction mixture was stirred at 80 °C for 12 h. Finally, the mixture was filtered, washed with brine, dried using anhydrous magnesium sulfate, concentrated under reduced pressure, the residue was purified by column chromatography (silica gel, PE) to afford the desired compound **15** as a white solid (4.2 g, 50% yield).

**Synthesis of (2-(dodecyloxy)-5-ethynyl-1,3-phenylene)dimethanol (HPA):**

Compound **15** (4.2 g, 10 mmol) and potassium carbonate (138 mg, 1 mmol) were dissolved in MeOH (50 mL) under an atmosphere of nitrogen, the resulting mixture was stirred at room temperature for 1 h. Finally, the mixture was filtered and concentrated under reduced pressure, the residue was purified by column chromatography (silica gel, PE) to afford the desired compound **HPA** as a pure yellow liquid (3.2 g, 92% yield). <sup>1</sup>H NMR (400 MHz, CDCl<sub>3</sub>): δ 7.50 (d, *J* = 16.4 Hz, 2H), 4.68 (d, *J* = 5.7 Hz, 4H), 3.88 (t, *J* = 6.6 Hz, 2H), 3.04 (s, 1H), 2.29–1.92 (m, 2H), 1.88–1.76 (m, 2H), 1.53–1.19 (m, 16H), 0.88 (t, *J* = 6.6 Hz, 3H).

**General procedure for aqueous polymerization of phenylacetylene.**

Under nitrogen atmosphere, a 2 ml dry solvent solution of Rh catalyst (4 μmol) was added to 500 equiv. of phenylacetylene monomer (2 mmol) in a Schlenk flask, obtaining a red solution. The reaction mixture was stirred at r.t. for 1 h to become viscous. Then the mixture was treated with a large amount of methanol containing two drops of acetic acid. After filtration, the polymer was washed with methanol and dried at 40 °C overnight to a constant weight under vacuum.

The different isomer contents of the poly(phenylacetylene) were calculated from the <sup>1</sup>H NMR spectra according to eqs (1).<sup>15</sup>

$$\% cis = \left[ I_{H1} / \left( I_{total} / 6 \right) \right] \times 100 \quad (1)$$

In the eqs (1), *I*<sub>H1</sub> is the integrate area of one alkynyl proton of phenylacetylene unit at 5.84 ppm, and *I*<sub>total</sub> is the total integrate area of aryl protons of the benzene ring unit at 6.94, 6.78 (*trans*), and 6.63 ppm and alkynyl proton of phenylacetylene unit at 5.84 ppm in the <sup>1</sup>H NMR spectrum.



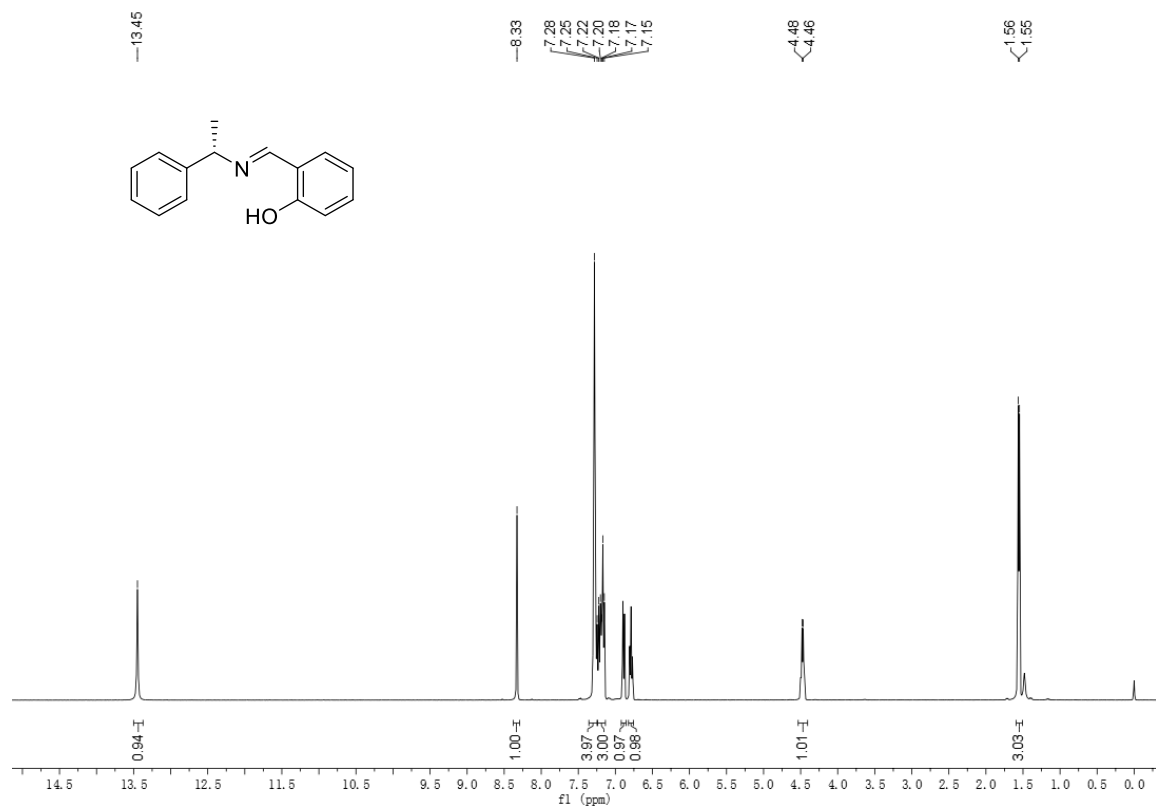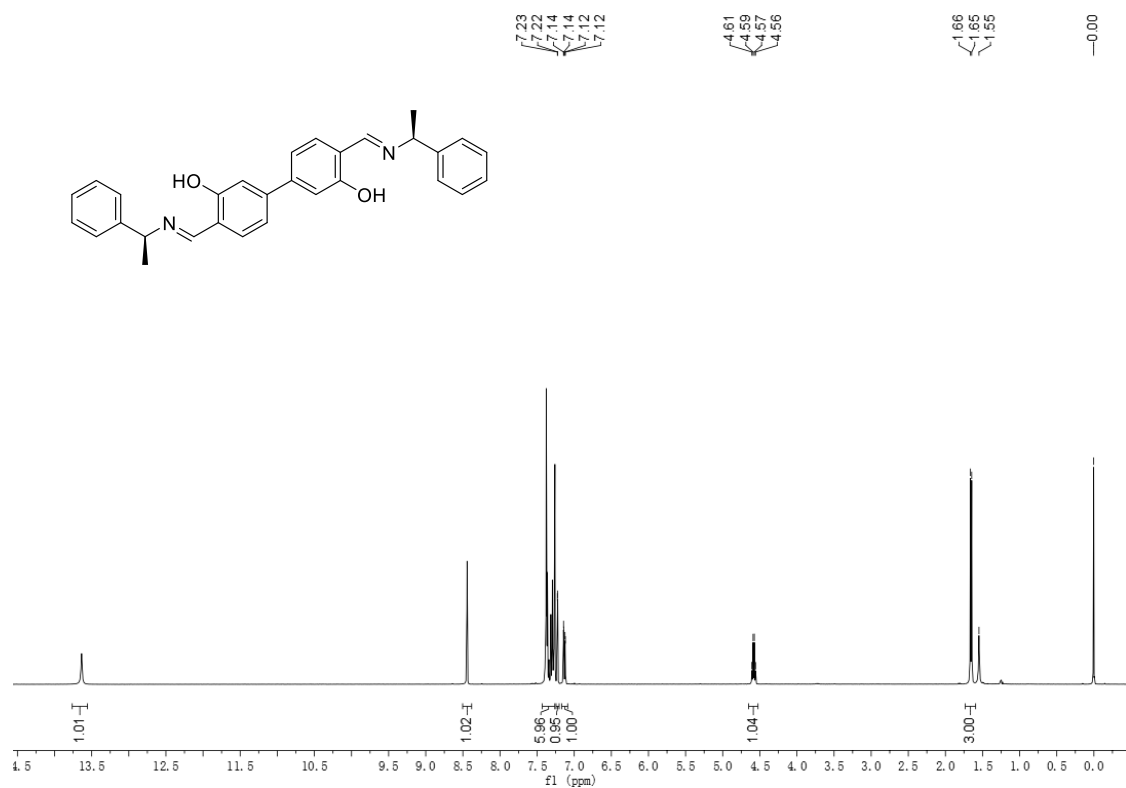

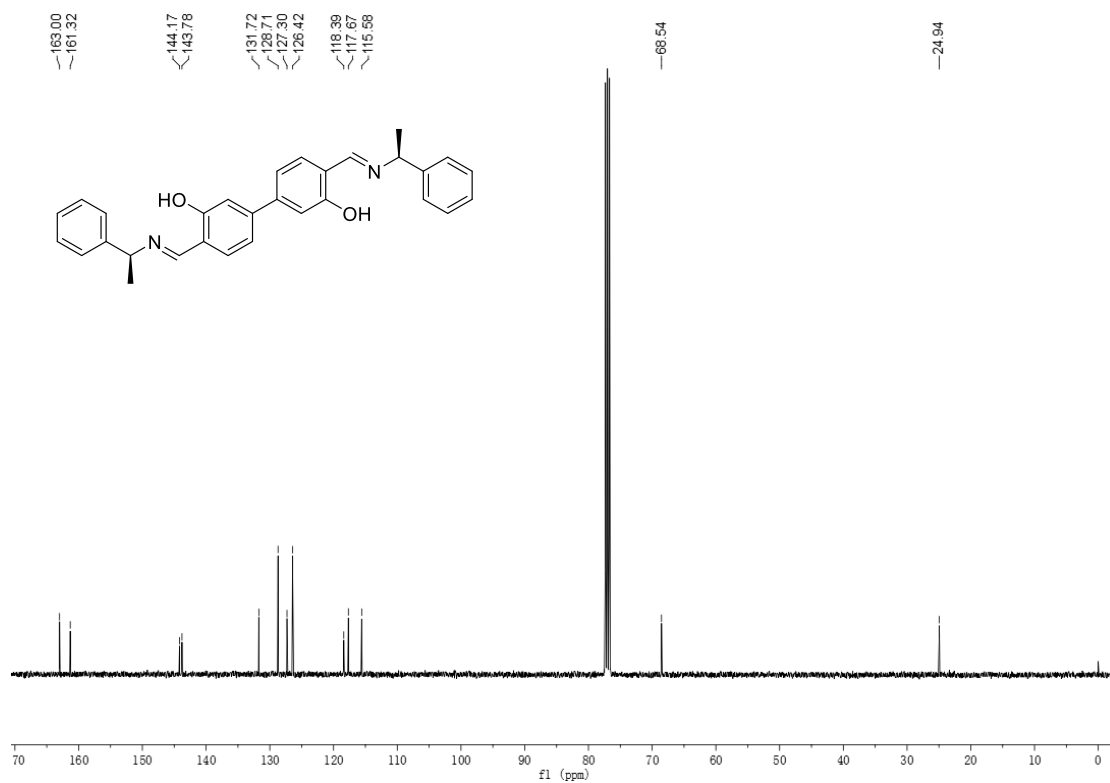

**Figure S3.**  $^{13}\text{C}$  NMR spectrum of 4,4'-bis((*E*)-(((*S*)-1-phenylethyl)imino)methyl)-[1,1'-biphenyl]-3,3'-diol ligand **L2**. (100MHz,  $\text{CDCl}_3$ , 25°C)

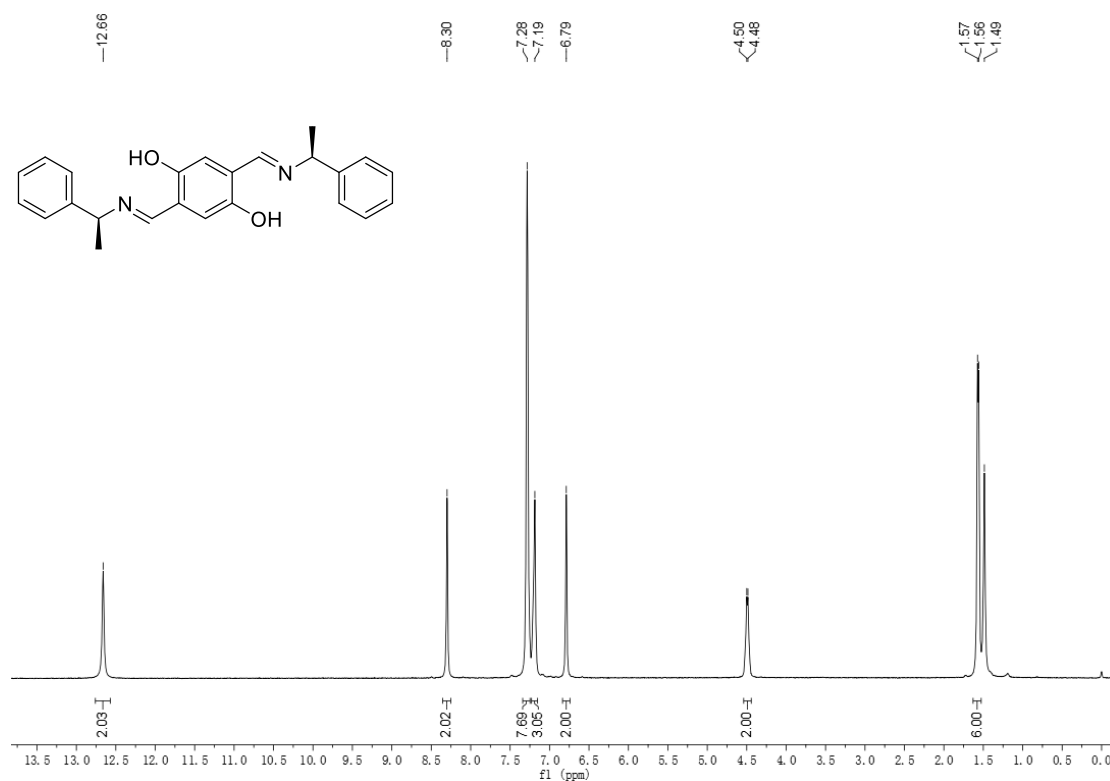

**Figure S4.**  $^1\text{H}$  NMR spectrum of 2,5-bis((*E*)-(((*S*)-1-phenylethyl)imino)methyl)benzene-1,4-diol ligand **L3**. (400MHz,  $\text{CDCl}_3$ , 25°C)

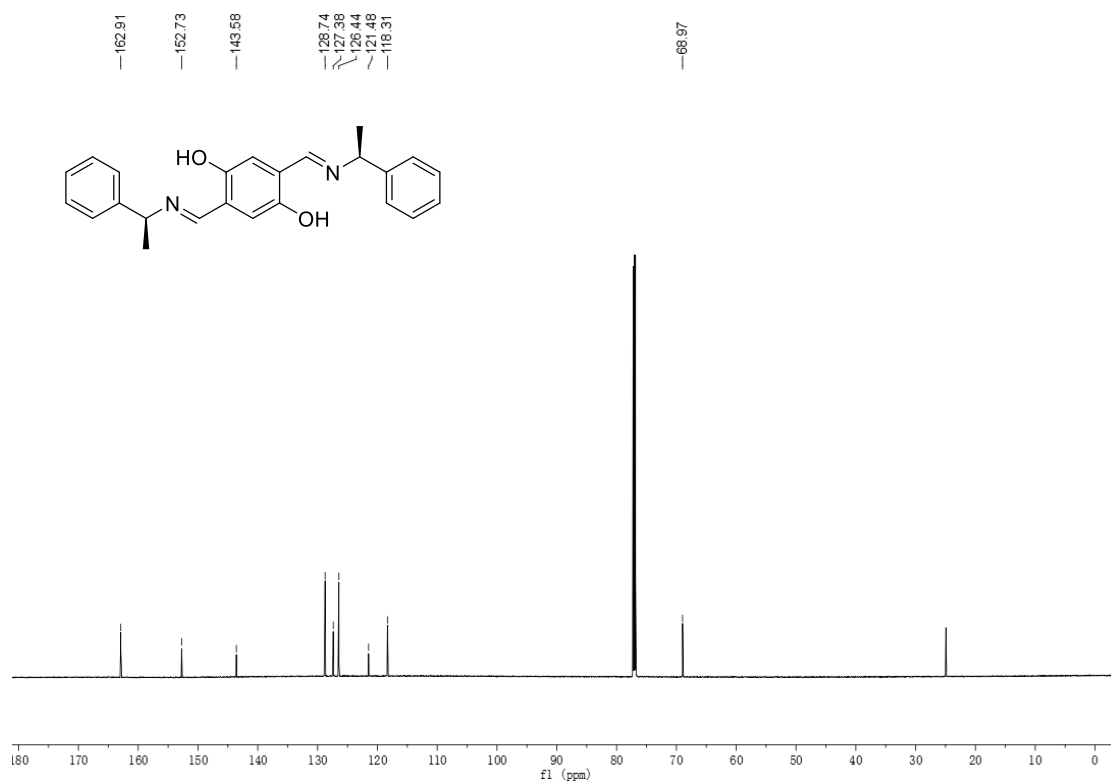

**Figure S5.** <sup>13</sup>C NMR spectrum of 2,5-bis((*E*)-((*S*)-1-phenylethyl)imino)methyl)benzene-1,4-diol ligand **L3**. (100MHz, CDCl<sub>3</sub>, 25°C)

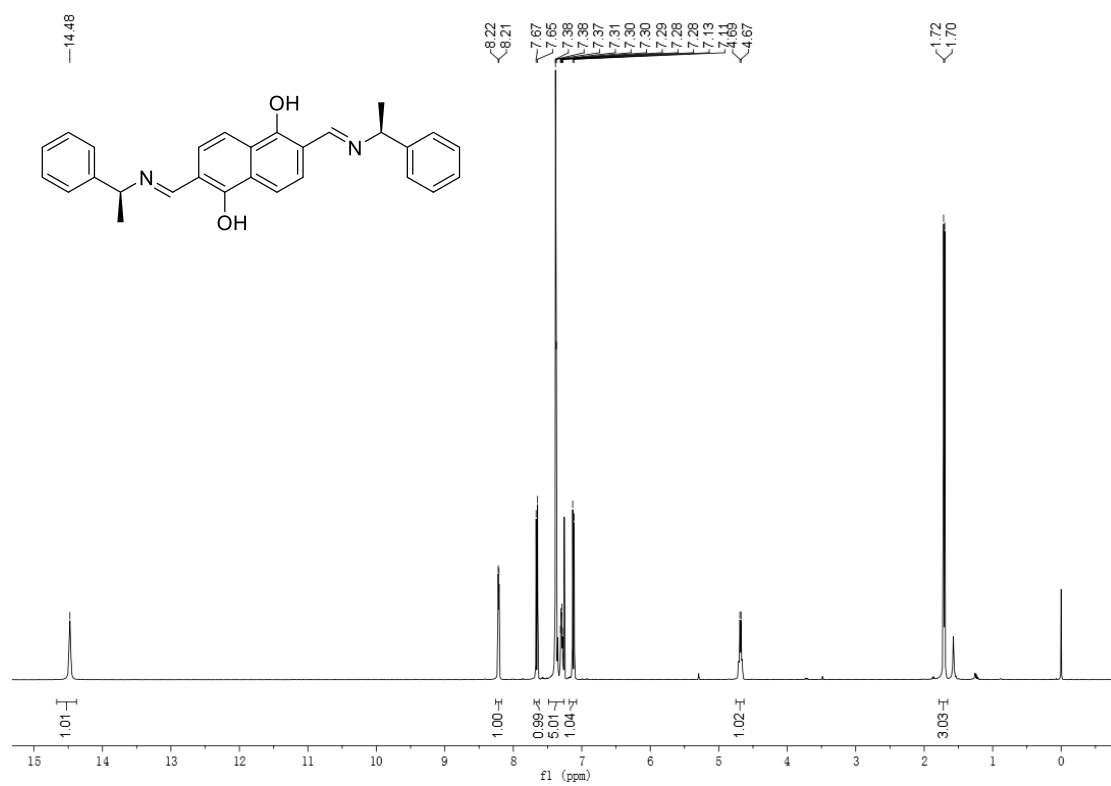

**Figure S6.** <sup>1</sup>H NMR spectrum of 2,6-bis((*E*)-((1-phenylethyl)imino)methyl)naphthalene-1,5-diol ligand **L4**. (400MHz, CDCl<sub>3</sub>, 25°C)

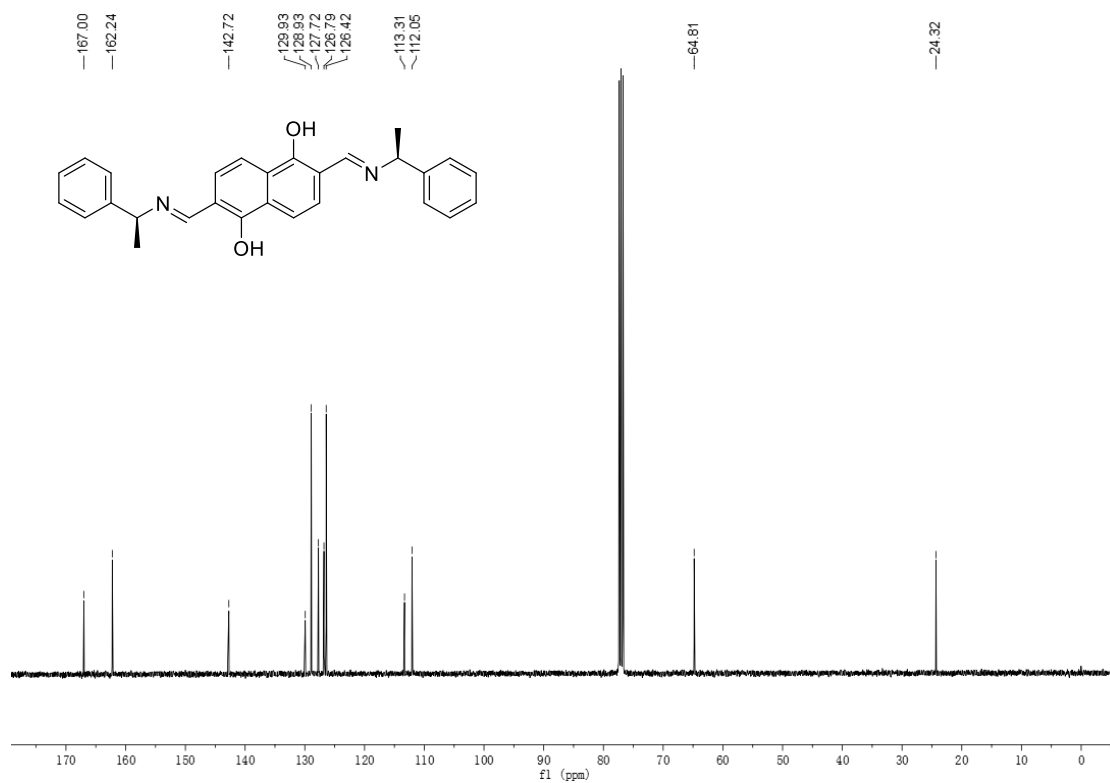

**Figure S7.**  $^{13}\text{C}$  NMR spectrum of 2,6-bis(*E*)-((1-phenylethyl)imino)methyl)naphthalene-1,5-diol ligand **L4**. (100MHz,  $\text{CDCl}_3$ , 25°C)

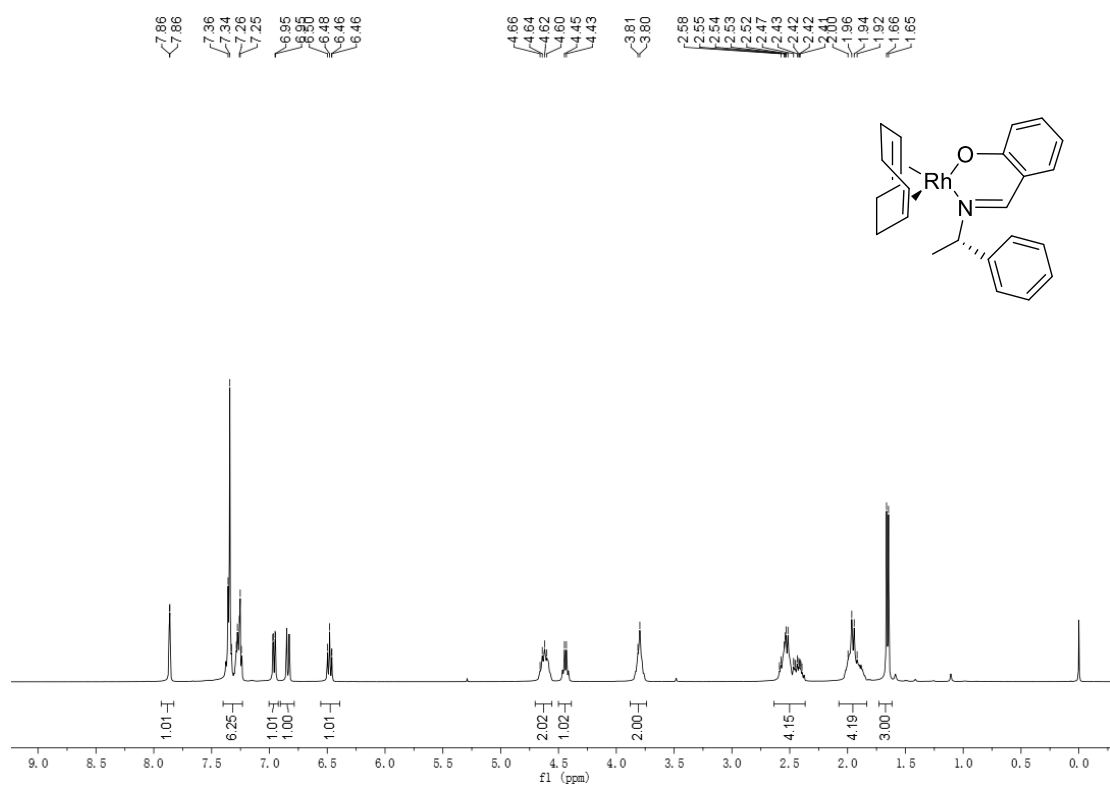

**Figure S8.**  $^1\text{H}$  NMR spectrum of Rh complexes **1a**. (400MHz,  $\text{CDCl}_3$ , 25°C)

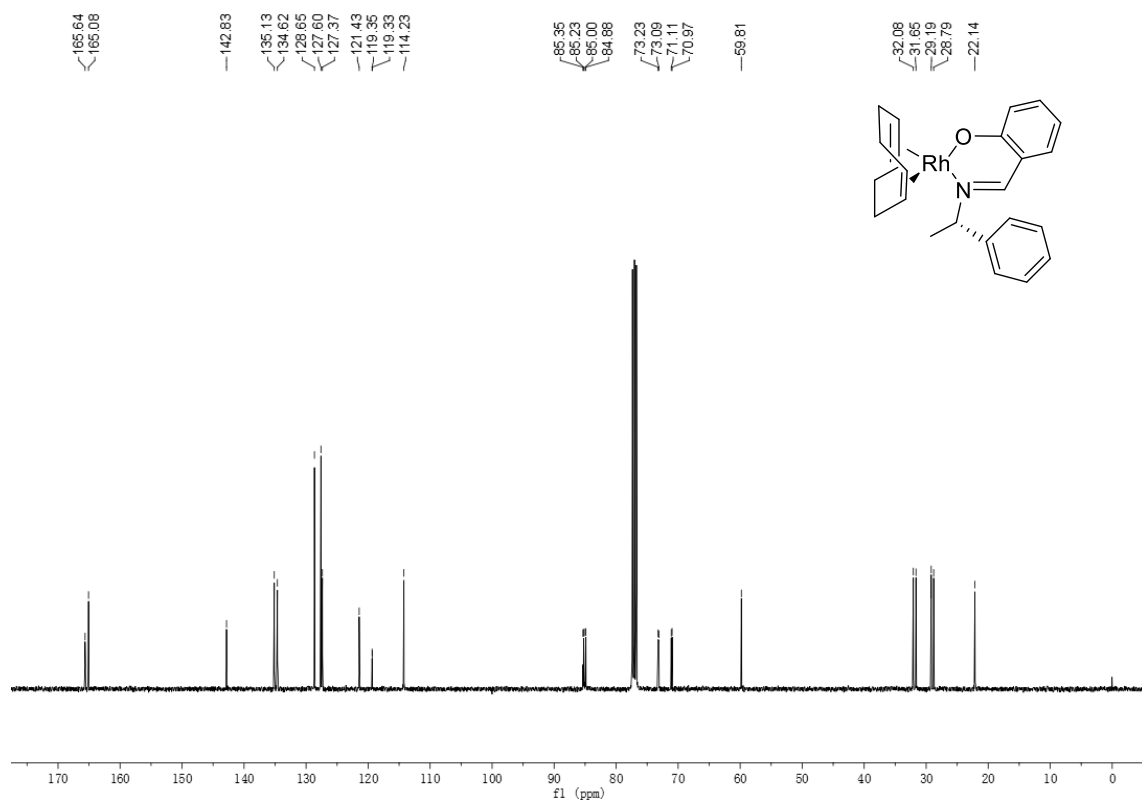

**Figure S9.**  $^{13}\text{C}$  NMR spectrum of Rh complexes **1a**. (100MHz,  $\text{CDCl}_3$ ,  $25^\circ\text{C}$ )

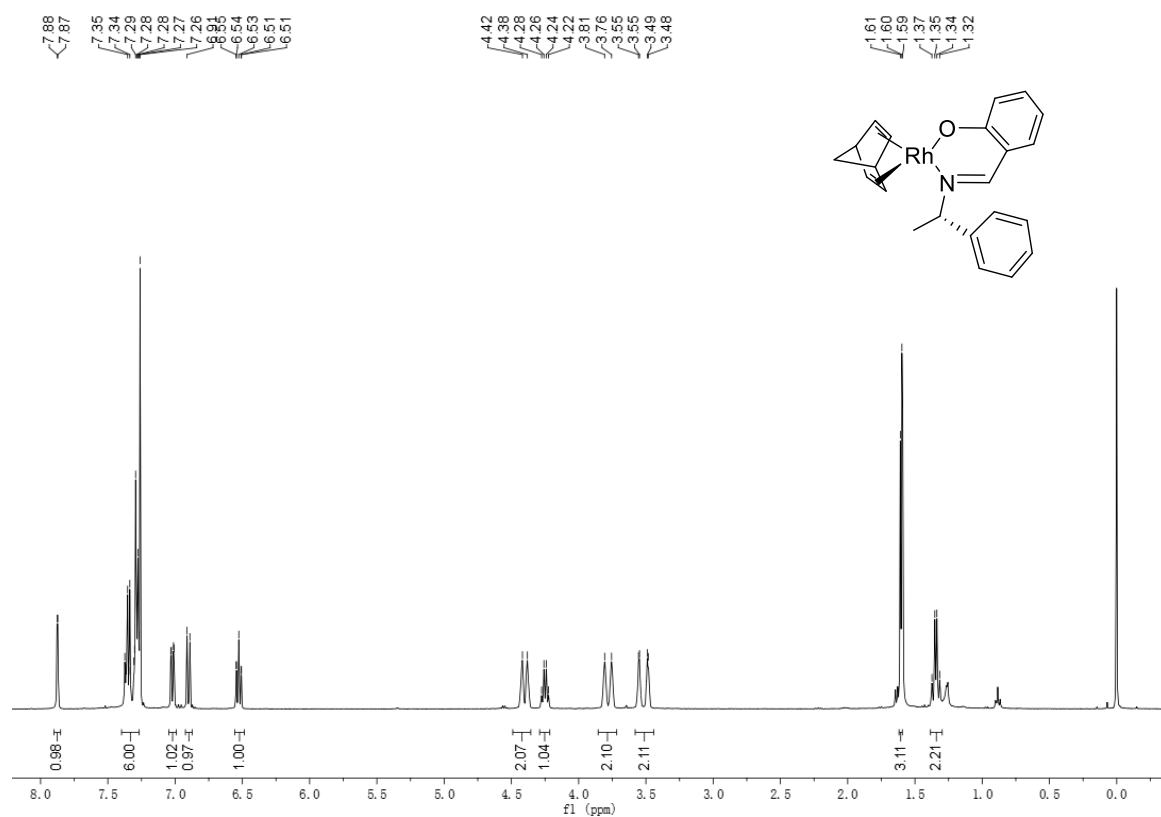

**Figure S10.**  $^1\text{H}$  NMR spectrum of Rh complexes **1b**. (400MHz,  $\text{CDCl}_3$ ,  $25^\circ\text{C}$ )

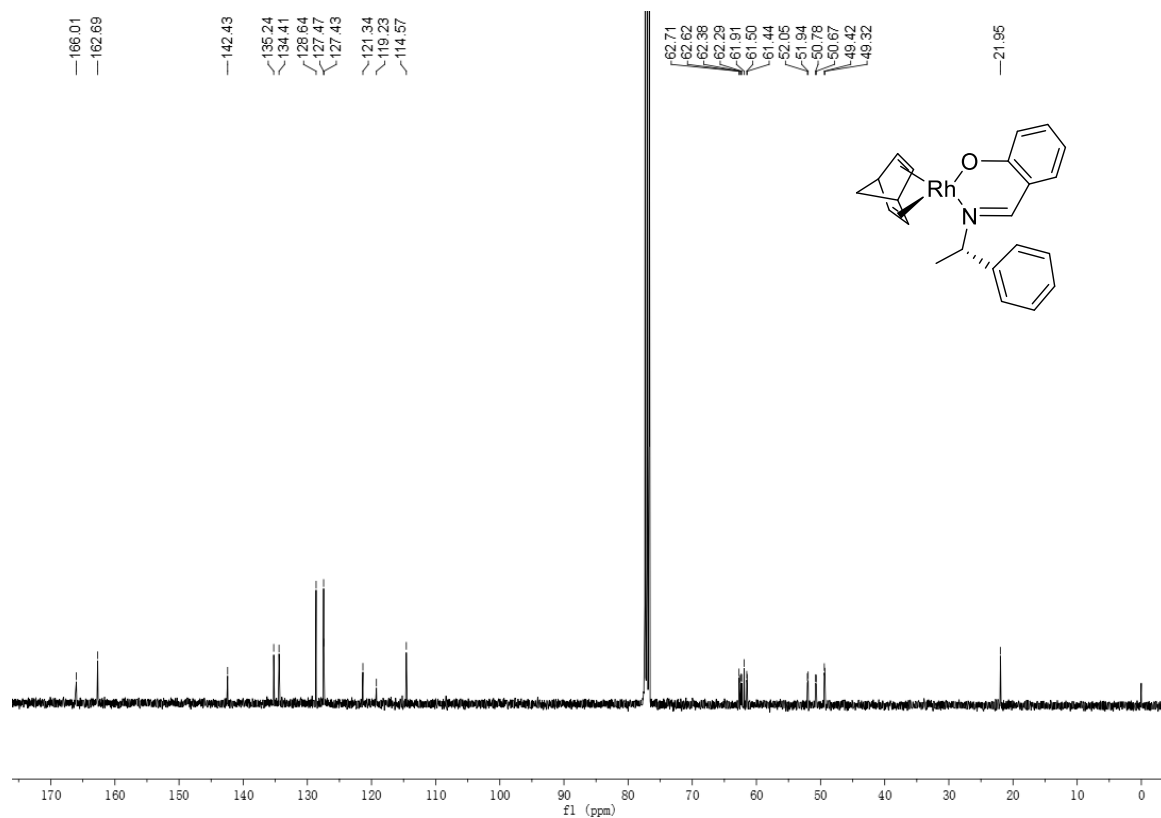

**Figure S11.** <sup>13</sup>C NMR spectrum of Rh complexes **1b**. (100MHz, CDCl<sub>3</sub>, 25°C)

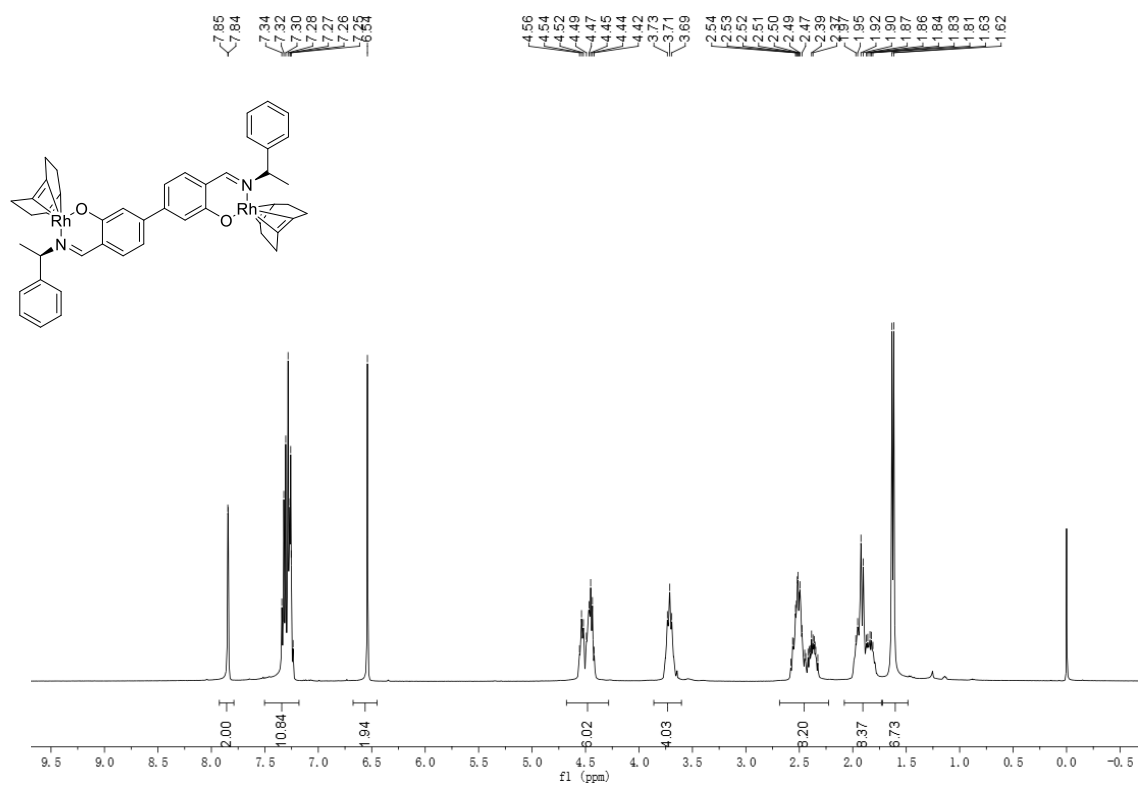

**Figure S12.** <sup>1</sup>H NMR spectrum of Rh complexes **2a**. (400MHz, CDCl<sub>3</sub>, 25°C)

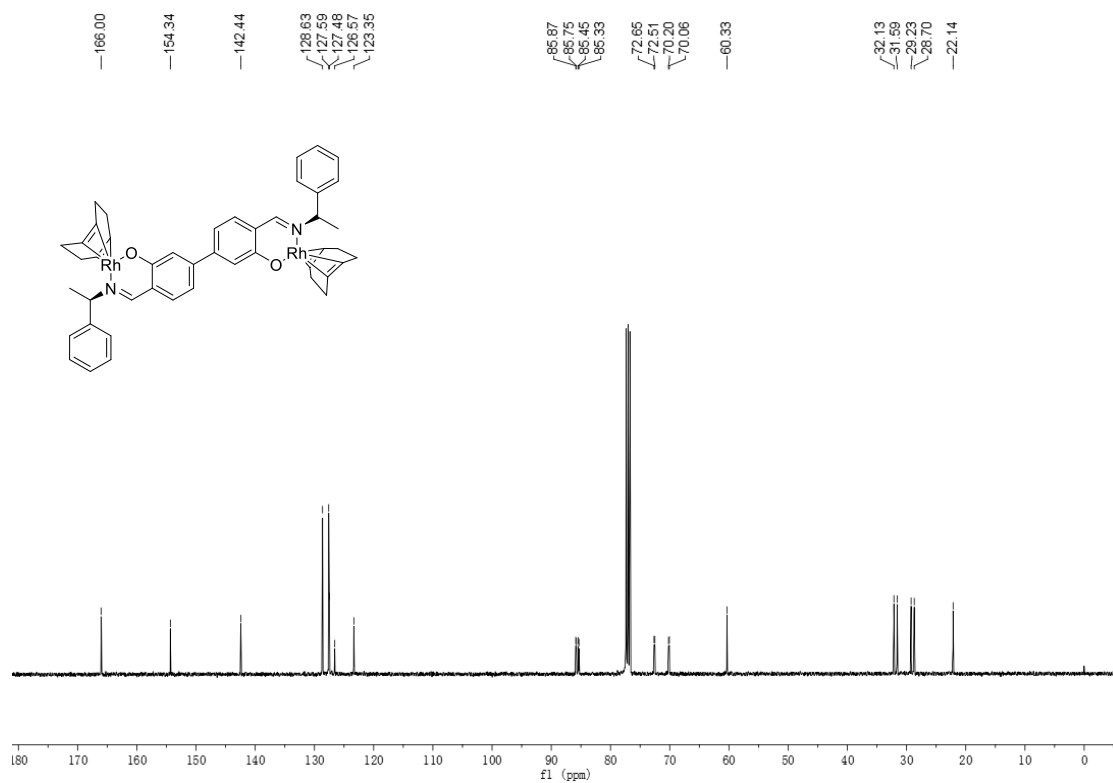

**Figure S13.**  $^{13}\text{C}$  NMR spectrum of Rh complexes **2a**. (100MHz,  $\text{CDCl}_3$ ,  $25^\circ\text{C}$ )

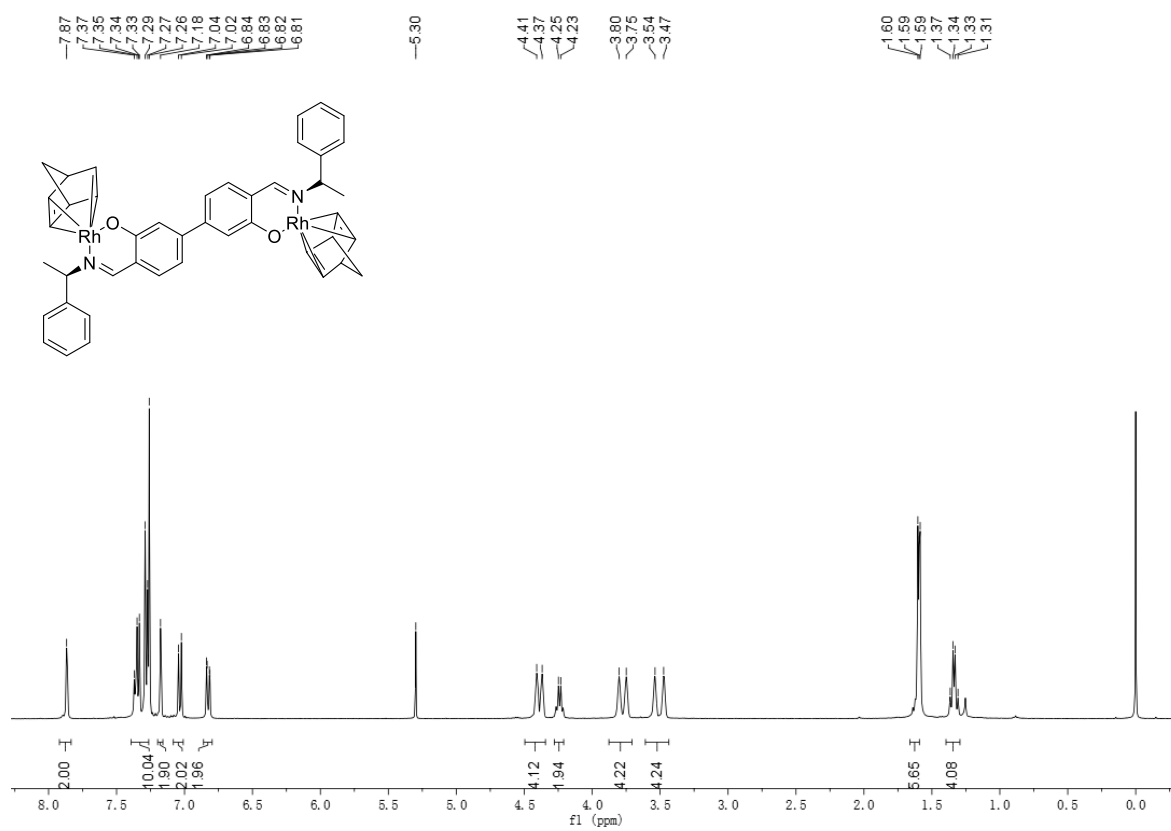

**Figure S14.**  $^1\text{H}$  NMR spectrum of Rh complexes **2b**. (400MHz,  $\text{CDCl}_3$ ,  $25^\circ\text{C}$ )

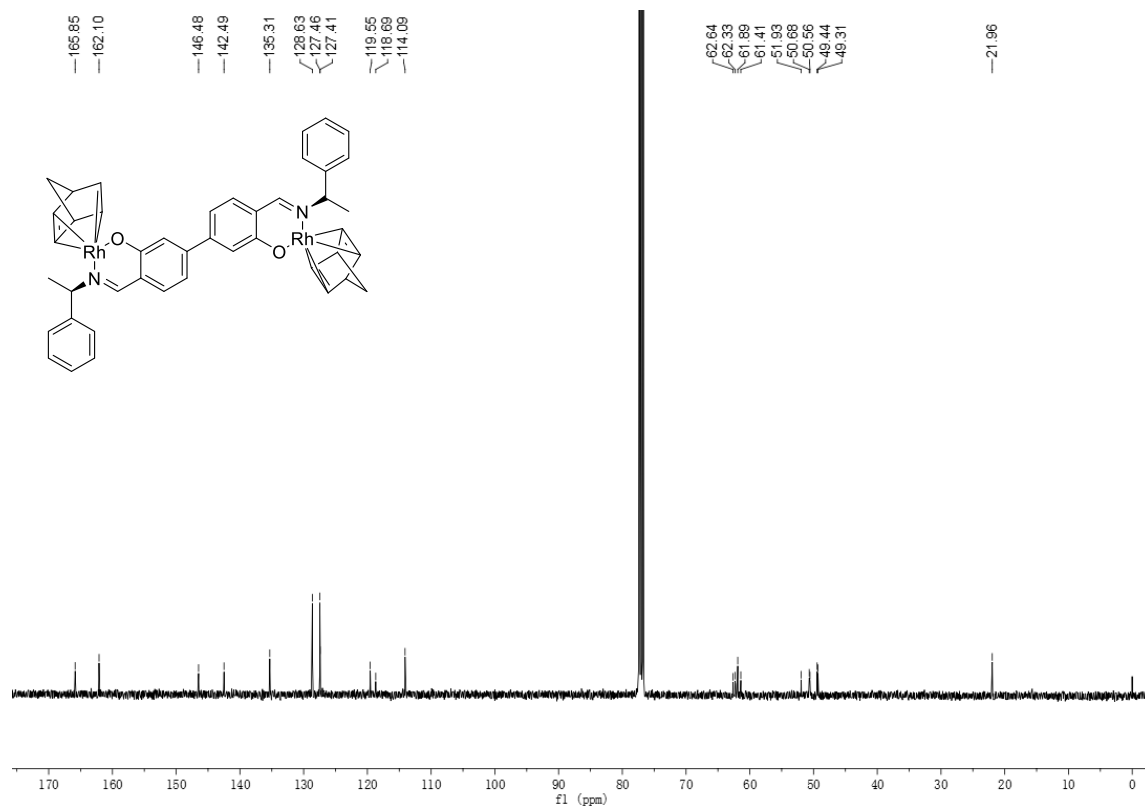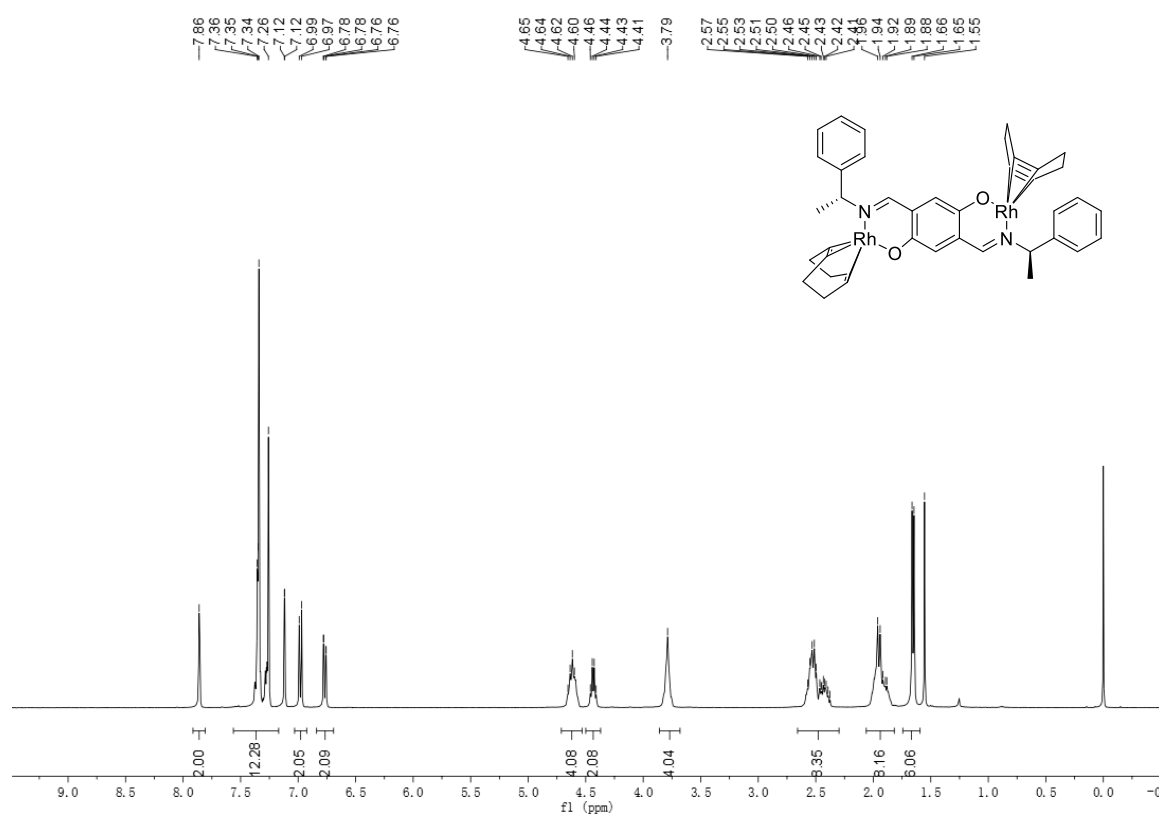



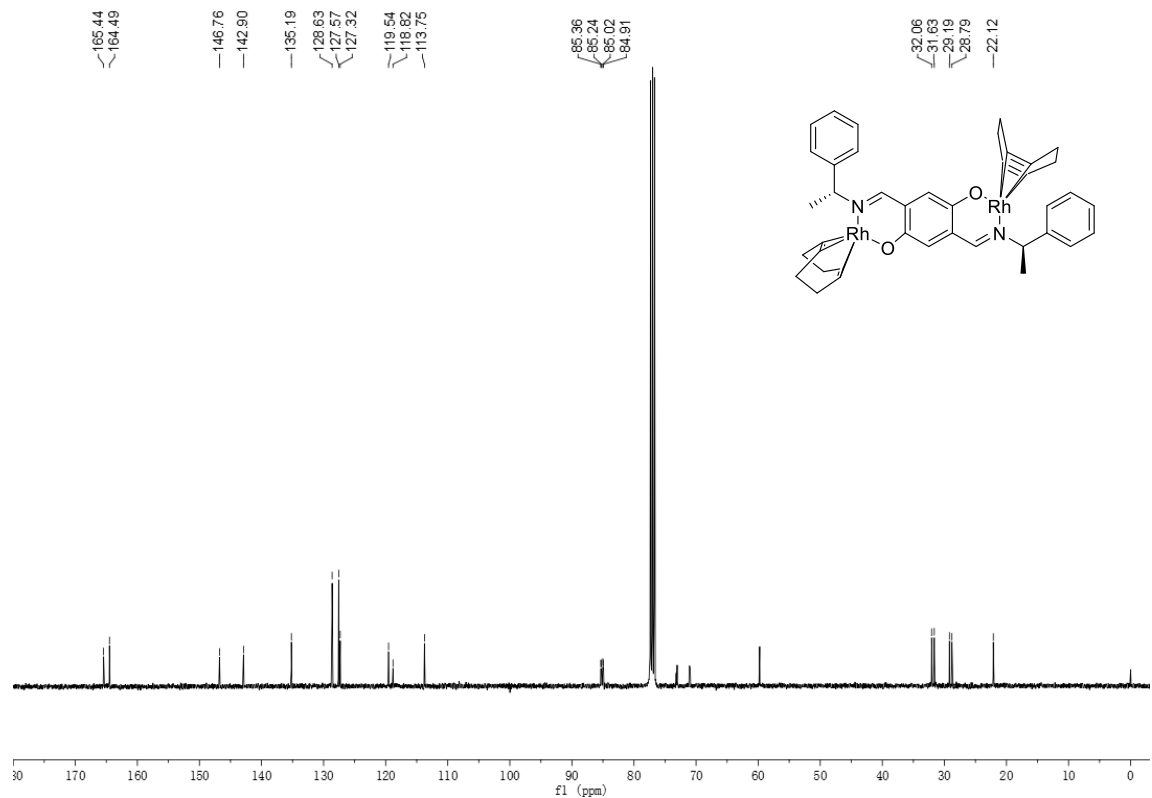

**Figure S17.**  $^{13}\text{C}$  NMR spectrum of Rh complexes **3a**. (100MHz,  $\text{CDCl}_3$ ,  $25^\circ\text{C}$ )

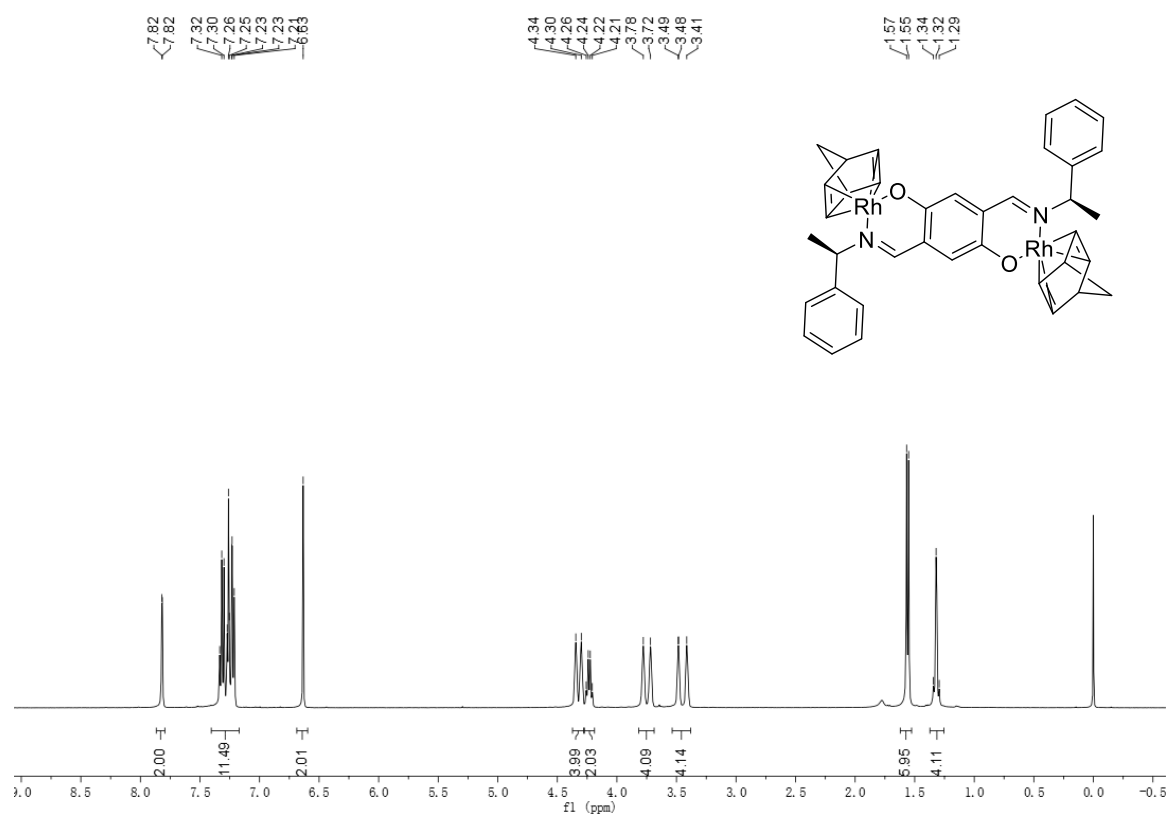

**Figure S18.**  $^1\text{H}$  NMR spectrum of Rh complexes **3b**. (400MHz,  $\text{CDCl}_3$ ,  $25^\circ\text{C}$ )

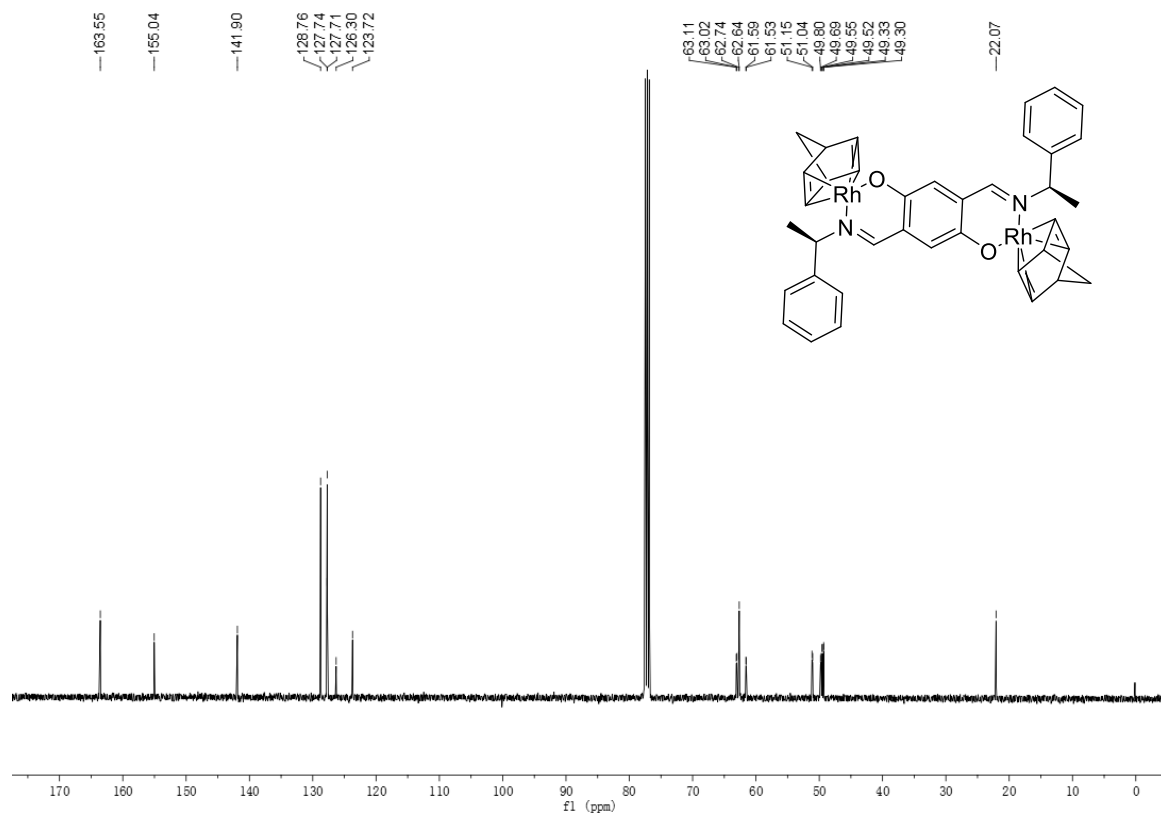

**Figure S19.**  $^{13}\text{C}$  NMR spectrum of Rh complexes **3b**. (100MHz,  $\text{CDCl}_3$ ,  $25^\circ\text{C}$ )

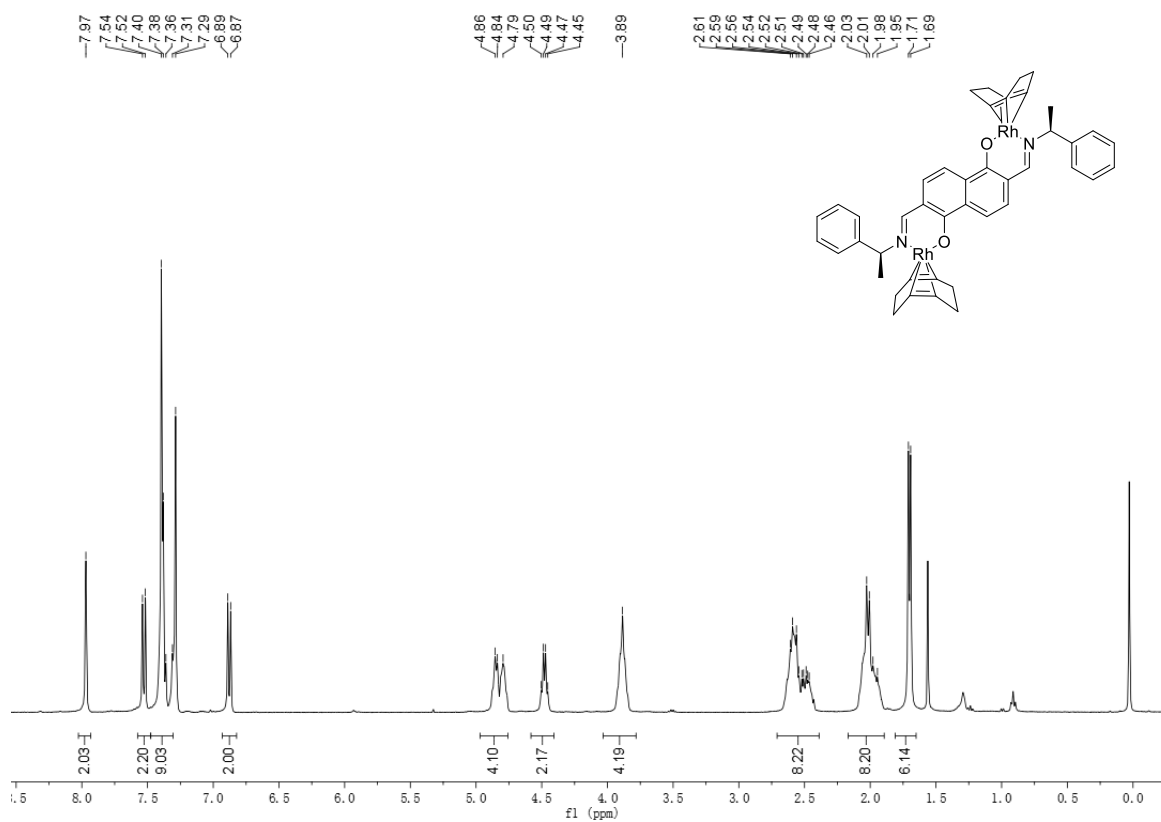

**Figure S20.**  $^1\text{H}$  NMR spectrum of Rh complexes **4a**. (400MHz,  $\text{CDCl}_3$ ,  $25^\circ\text{C}$ )

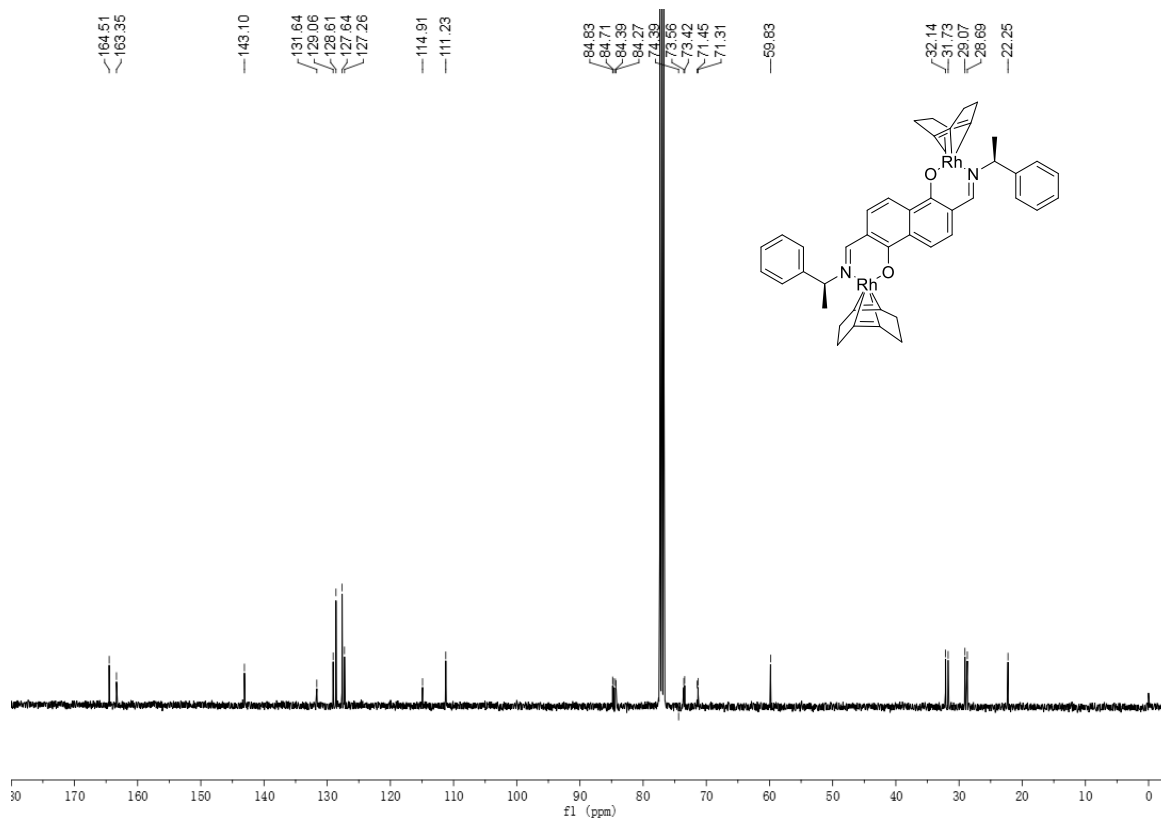

**Figure S21.** <sup>13</sup>C NMR spectrum of Rh complexes **4a**. (100MHz, CDCl<sub>3</sub>, 25°C)

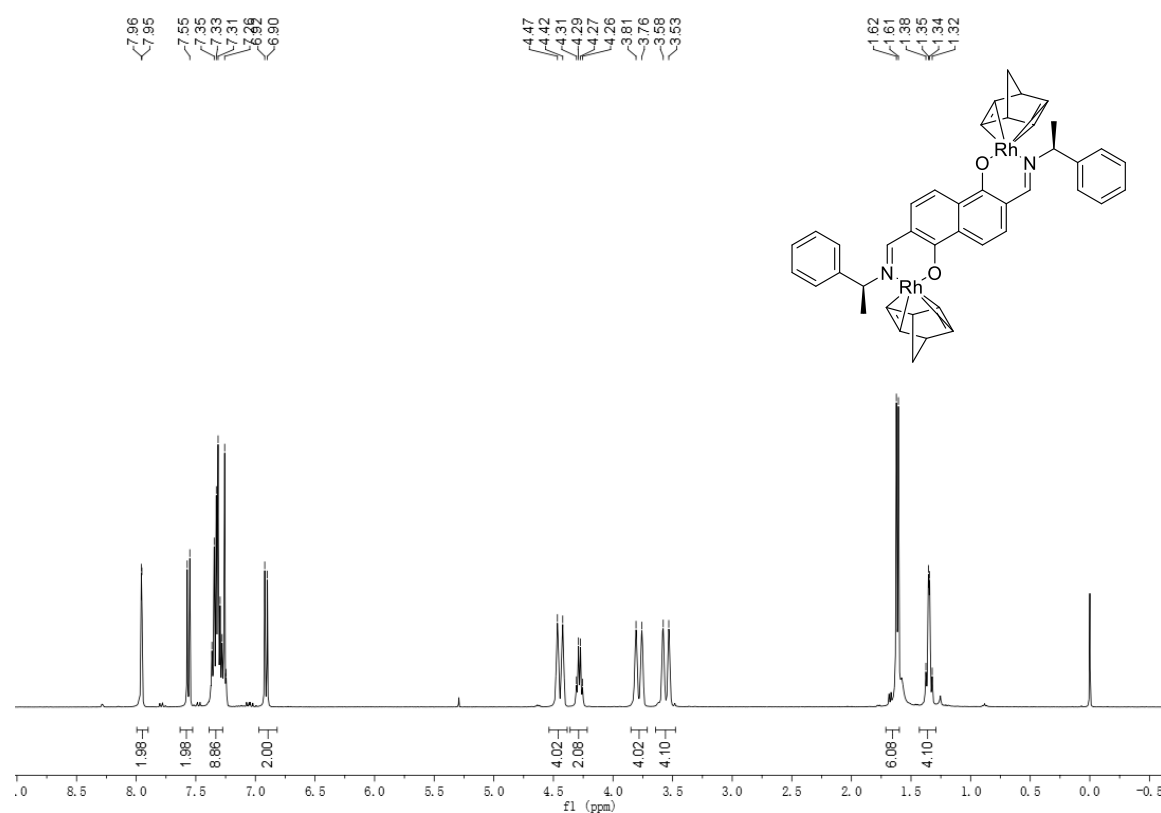

**Figure S22.** <sup>1</sup>H NMR spectrum of Rh complexes **4b**. (400MHz, CDCl<sub>3</sub>, 25°C)

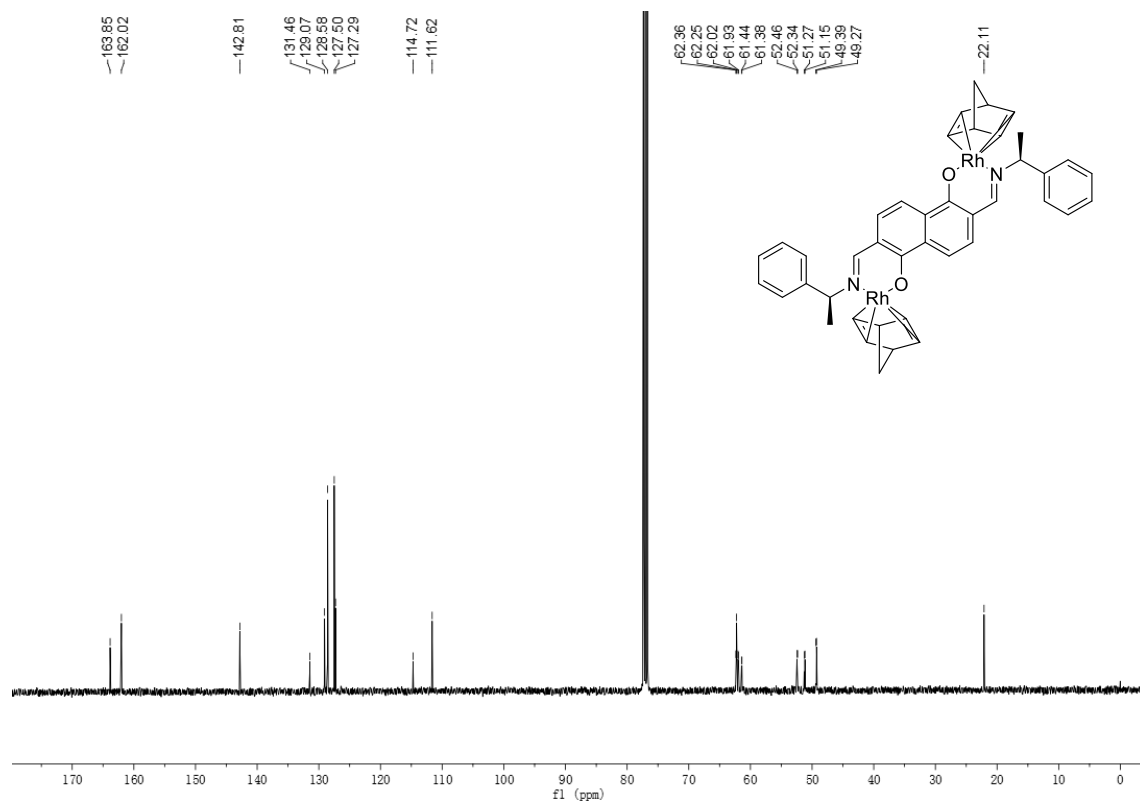

**Figure S23.**  $^{13}\text{C}$  NMR spectrum of Rh complexes **4b**. (100MHz,  $\text{CDCl}_3$ ,  $25^\circ\text{C}$ )

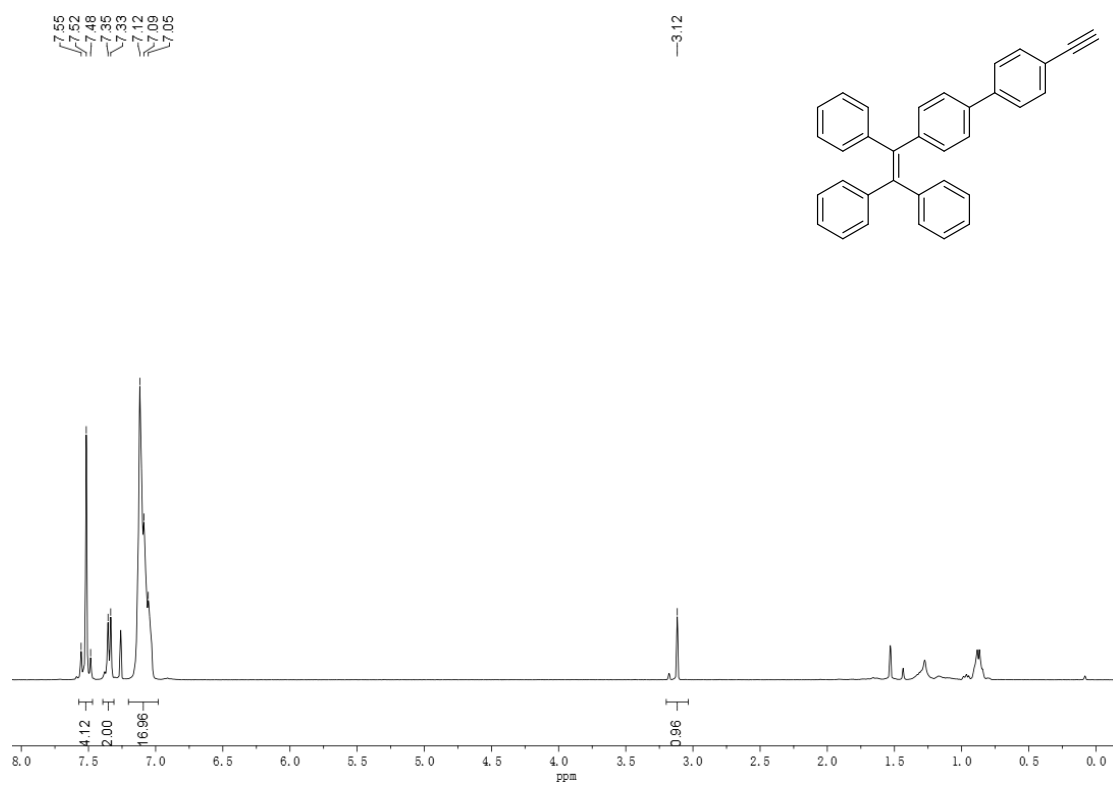

**Figure S24.**  $^1\text{H}$  NMR spectrum of (2-(dodecyloxy)-5-ethynyl-1,3-phenylene)dimethanol (**TPA**). (400MHz,  $\text{CDCl}_3$ ,  $25^\circ\text{C}$ )

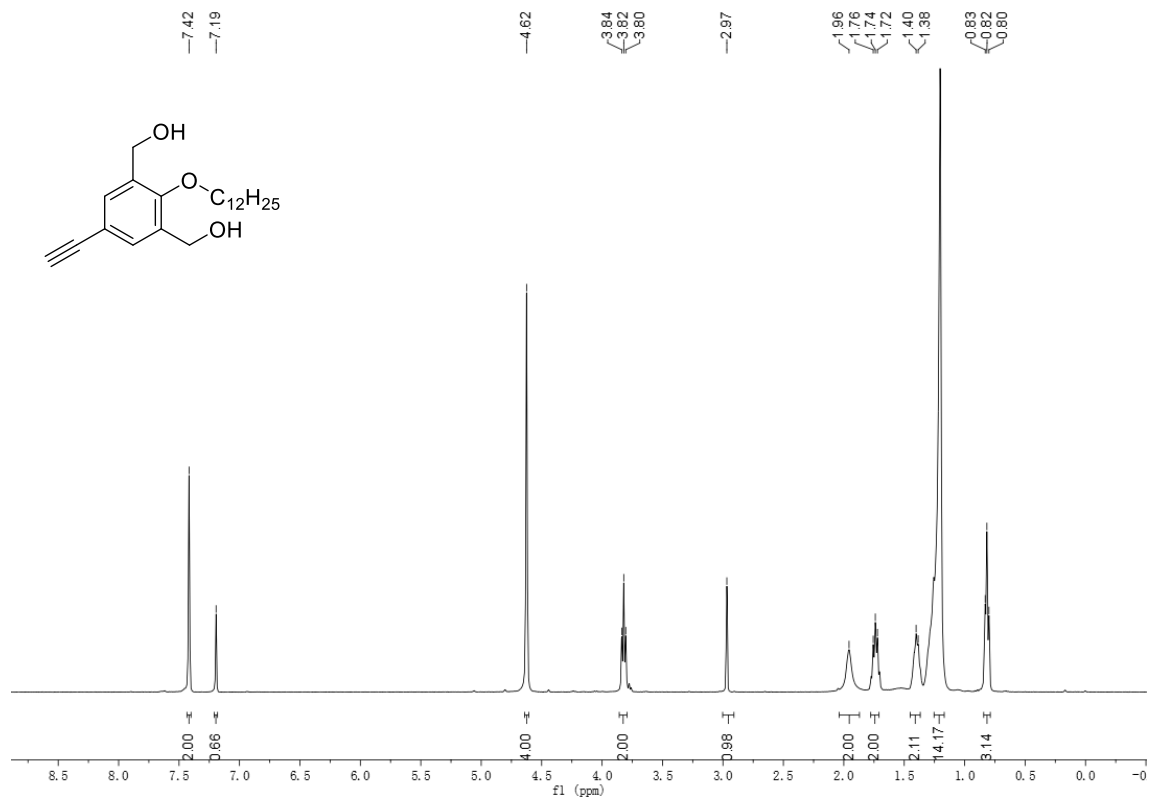

**Figure S25.** <sup>1</sup>H NMR spectrum of (2-(dodecyloxy)-5-ethynyl-1,3-phenylene)dimethanol (HPA). (400MHz, CDCl<sub>3</sub>, 25°C)

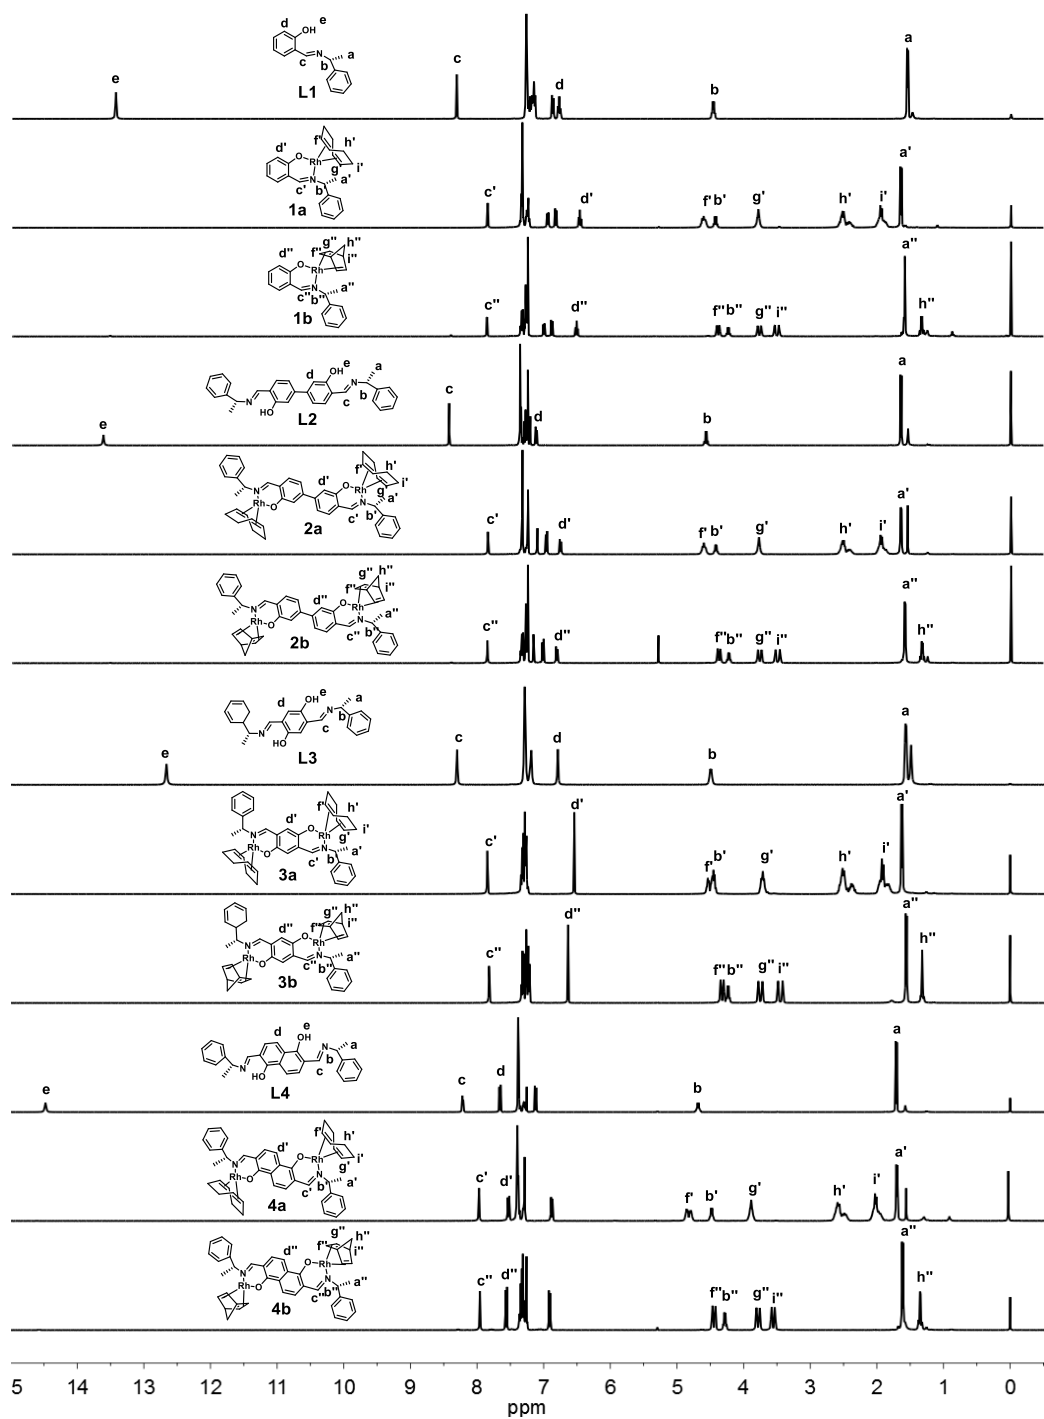

**Figure S26.**  $^1\text{H}$  NMR spectra of phenoxyimine ligands and phenoxyiminato ligated Rh complexes (1-4)(a-b) in  $\text{CDCl}_3$  in air. (400MHz,  $\text{CDCl}_3$ ,  $25^\circ\text{C}$ )

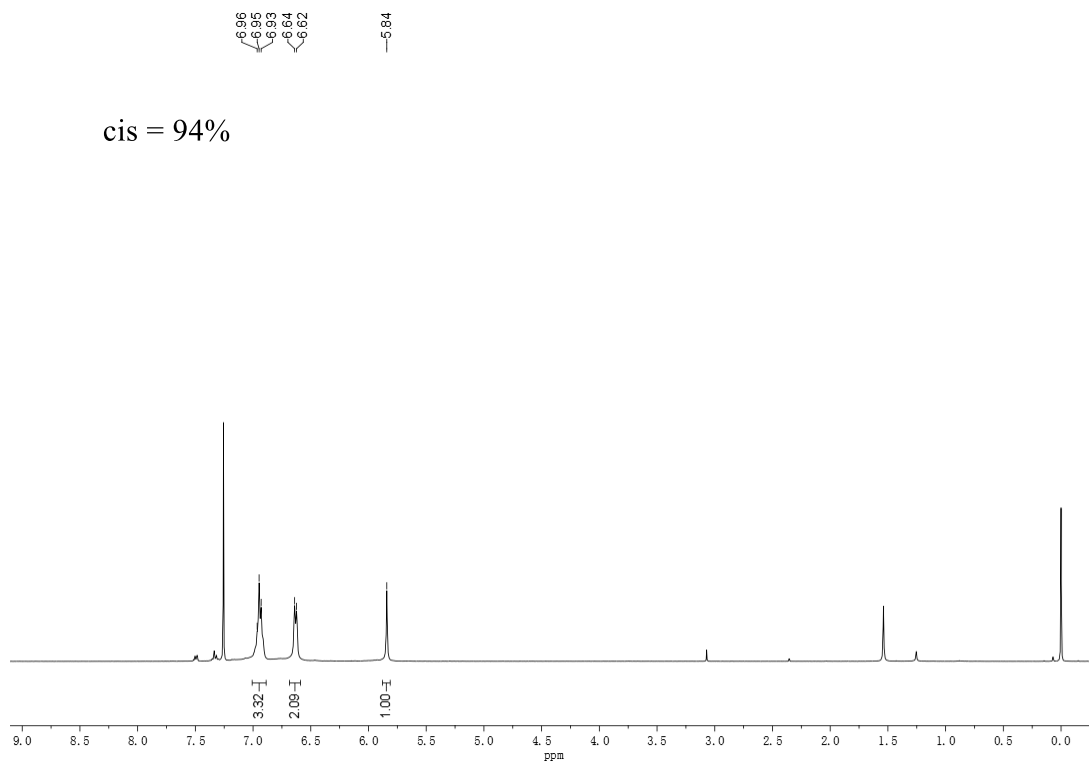

**Figure S27.**  $^1\text{H}$  NMR spectrum of polymer in Table 3, entry 1 (400MHz,  $\text{CDCl}_3$ ,  $25^\circ\text{C}$ ).

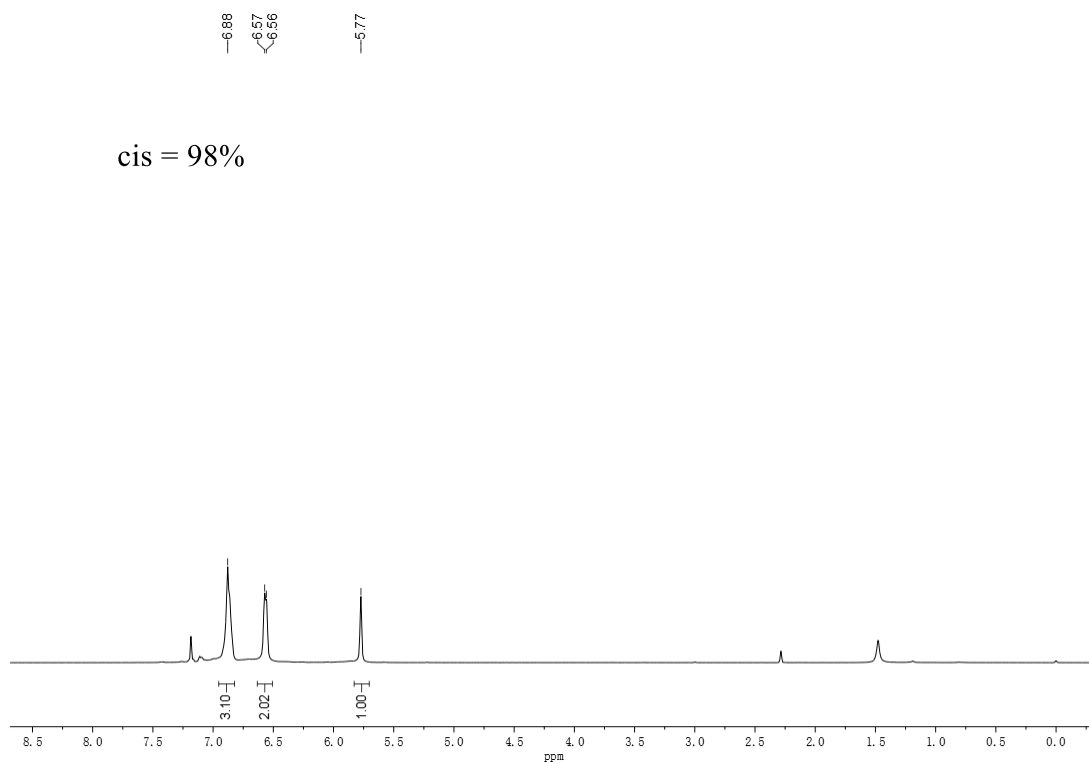

**Figure S28.**  $^1\text{H}$  NMR spectrum of polymer in Table 3, entry 2 (400MHz,  $\text{CDCl}_3$ ,  $25^\circ\text{C}$ ).

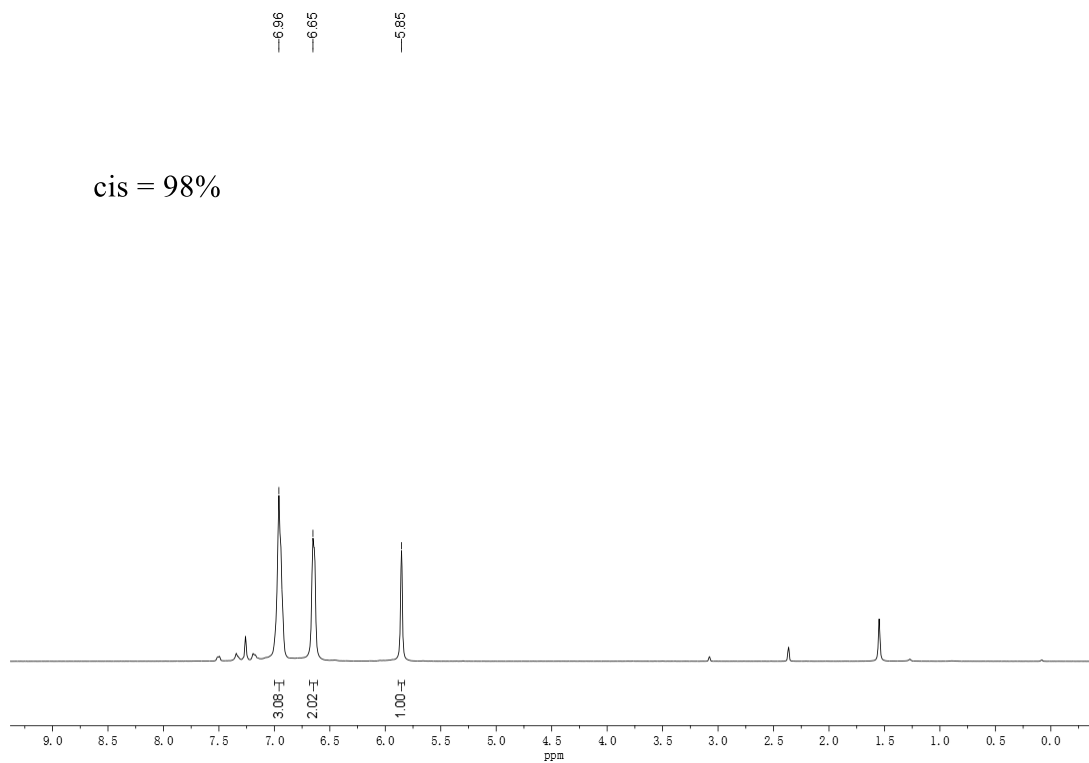

**Figure S29.**  $^1\text{H}$  NMR spectrum of polymer in Table 3, entry 3 (400MHz,  $\text{CDCl}_3$ ,  $25^\circ\text{C}$ ).

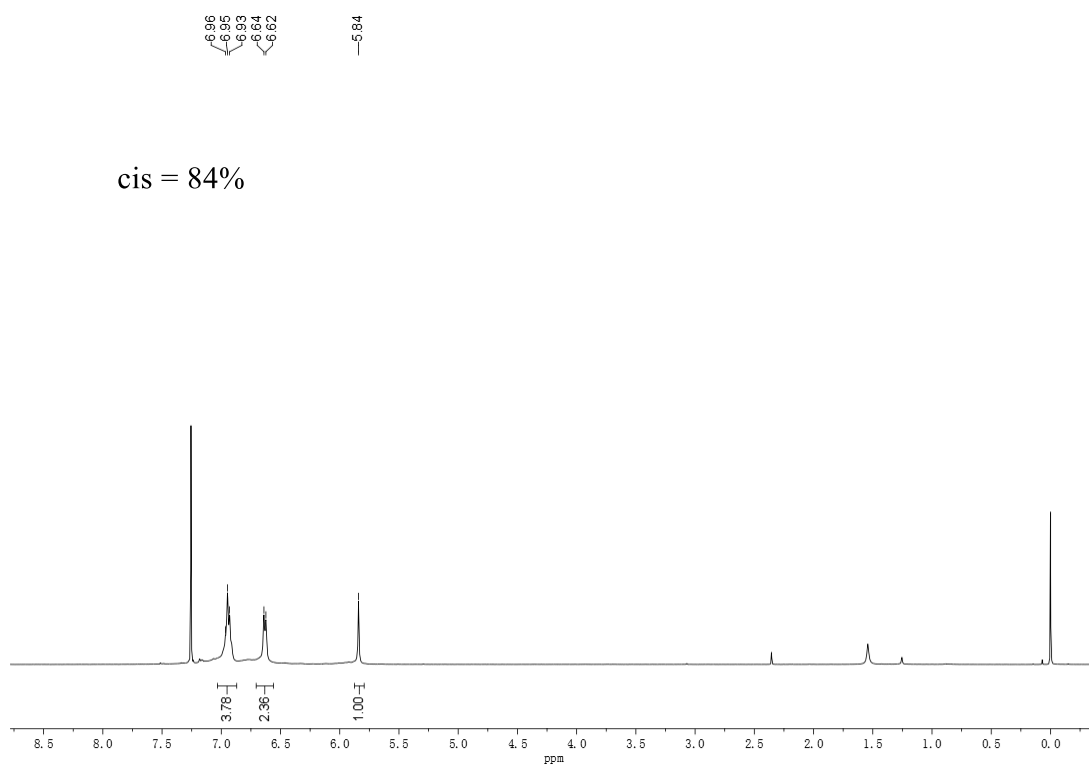

**Figure S30.**  $^1\text{H}$  NMR spectrum of polymer in Table 3, entry 4 (400MHz,  $\text{CDCl}_3$ ,  $25^\circ\text{C}$ ).



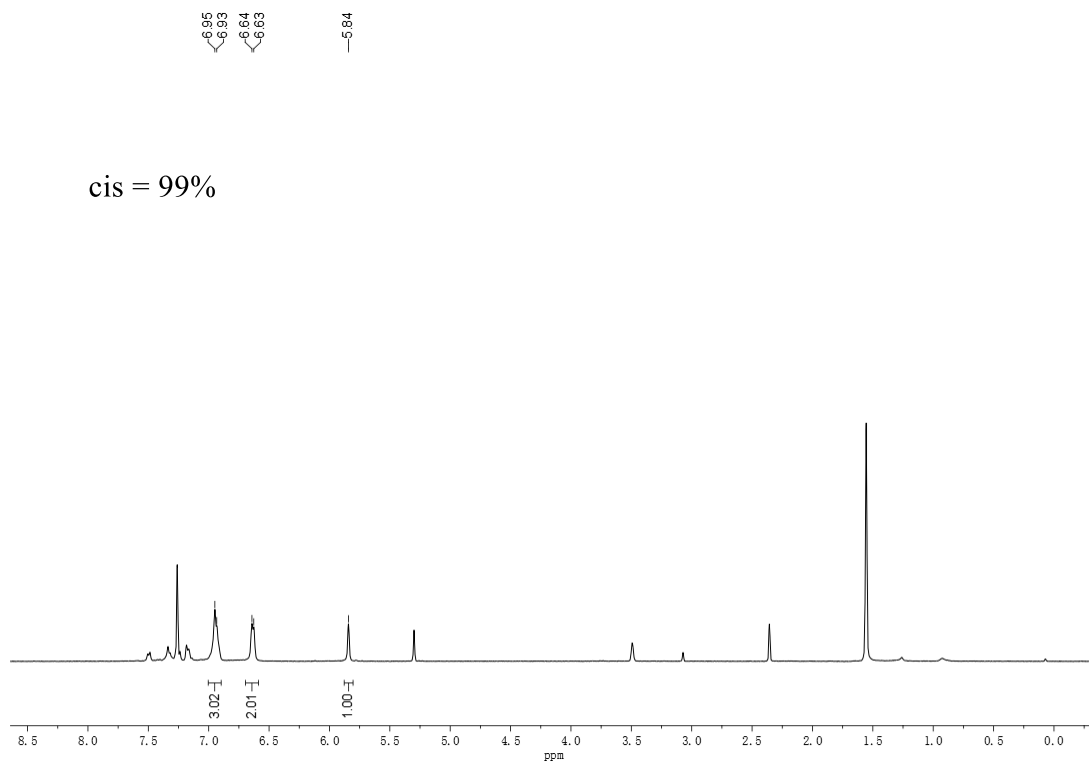

**Figure S31.**  $^1\text{H}$  NMR spectrum of polymer in Table 3, entry 7 (400MHz,  $\text{CDCl}_3$ , 25°C).

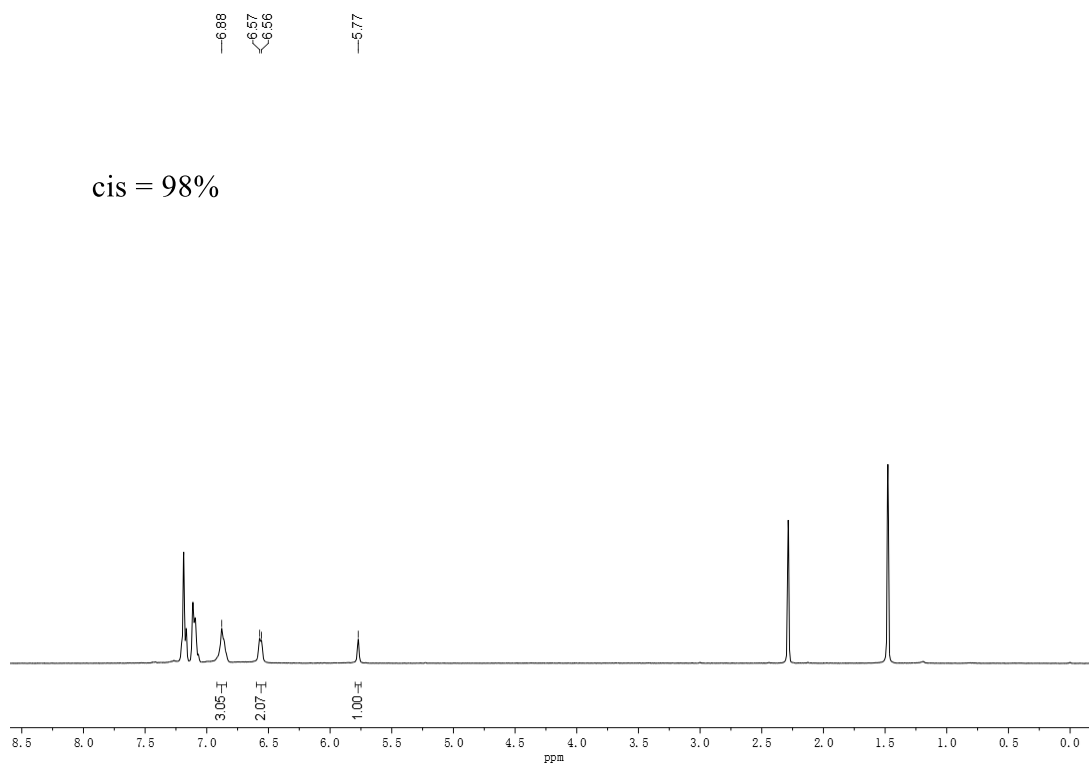

**Figure S32.**  $^1\text{H}$  NMR spectrum of polymer in Table 3, entry 12 (400MHz,  $\text{CDCl}_3$ , 25°C).

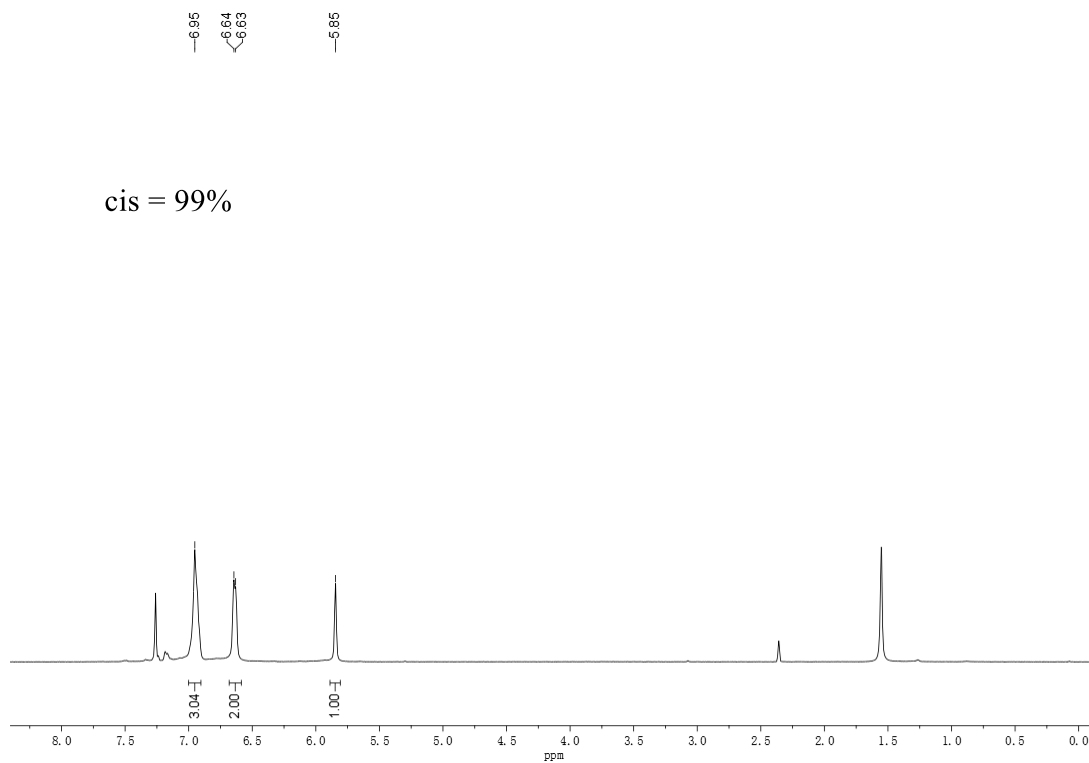

**Figure S33.**  $^1\text{H}$  NMR spectrum of polymer in Table 3, entry 13 (400MHz,  $\text{CDCl}_3$ ,  $25^\circ\text{C}$ ).

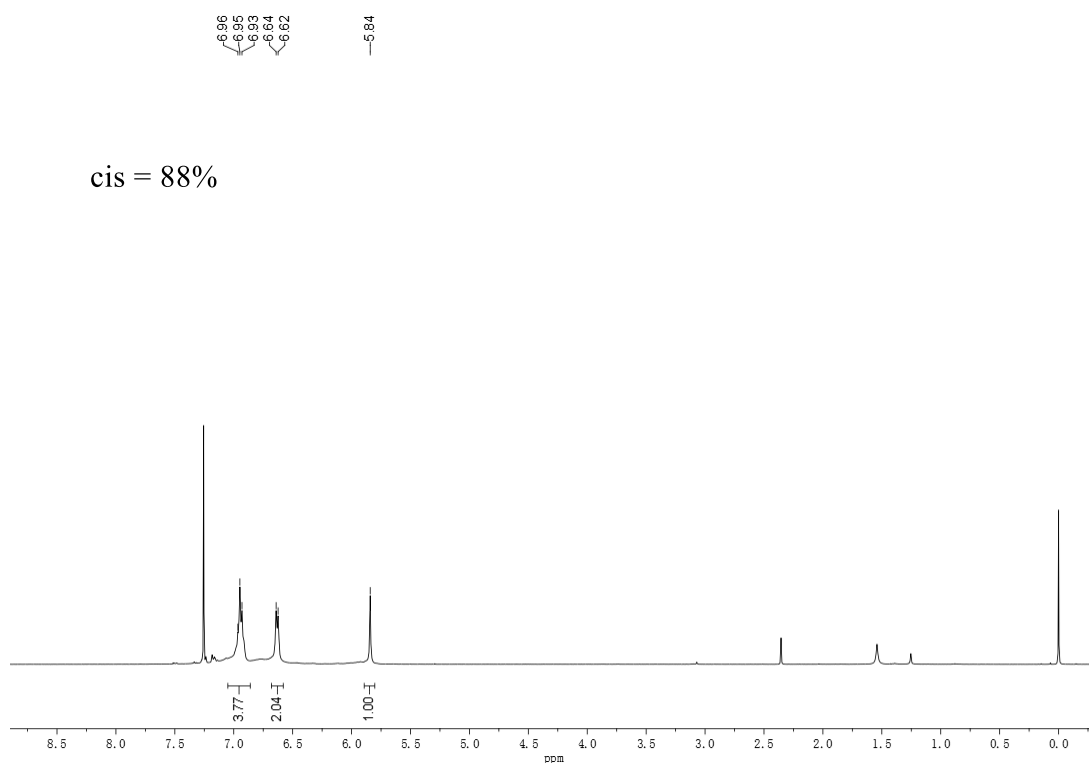

**Figure S34.**  $^1\text{H}$  NMR spectrum of polymer in Table 3, entry 14 (400MHz,  $\text{CDCl}_3$ ,  $25^\circ\text{C}$ ).

cis = 93%

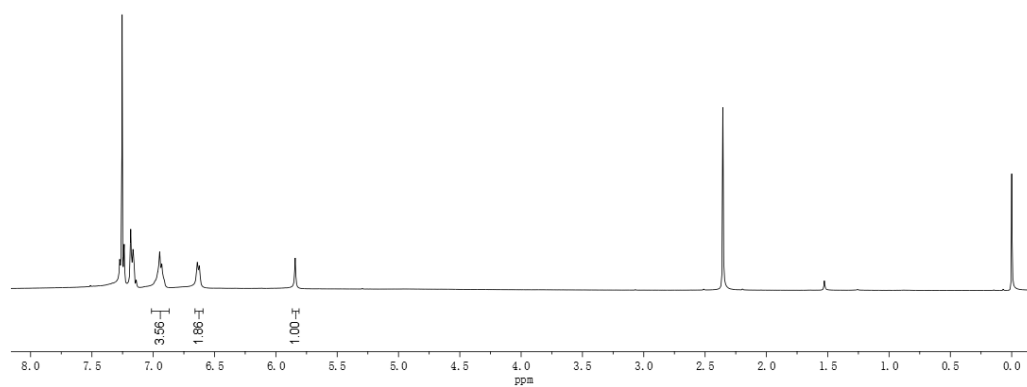

**Figure S35.** <sup>1</sup>H NMR spectrum of polymer in Table 4, entry 3 (400MHz, CDCl<sub>3</sub>, 25°C).

cis = 94%

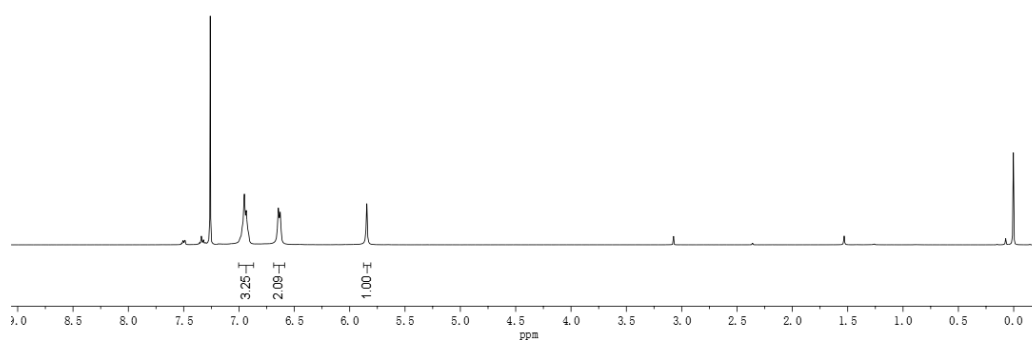

**Figure S36.** <sup>1</sup>H NMR spectrum of polymer in Table 4, entry 7 (400MHz, CDCl<sub>3</sub>, 25°C).

cis = 98%

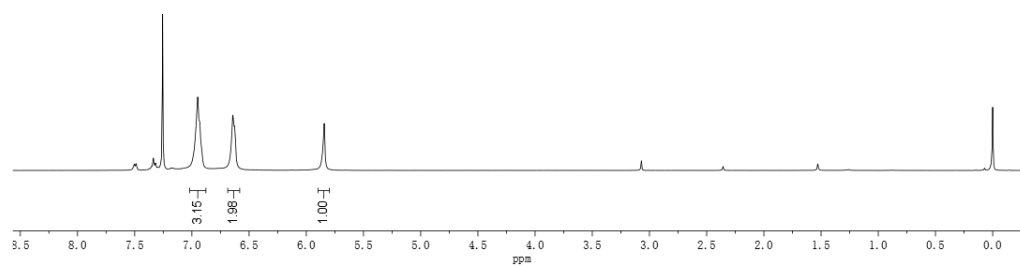

**Figure S37.** <sup>1</sup>H NMR spectrum of polymer in Table 4, entry 11 (400MHz, CDCl<sub>3</sub>, 25°C).

cis = 87%

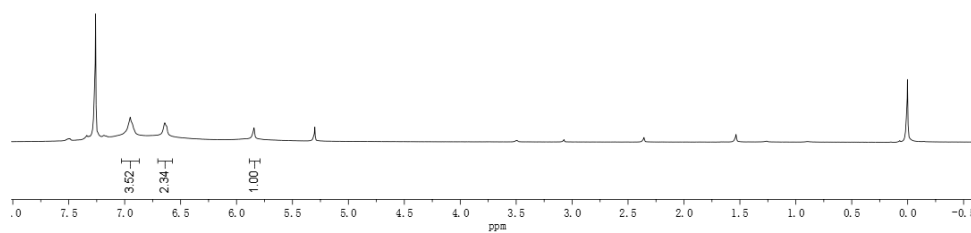

**Figure S38.** <sup>1</sup>H NMR spectrum of polymer in Table 4, entry 15 (400MHz, CDCl<sub>3</sub>, 25°C).

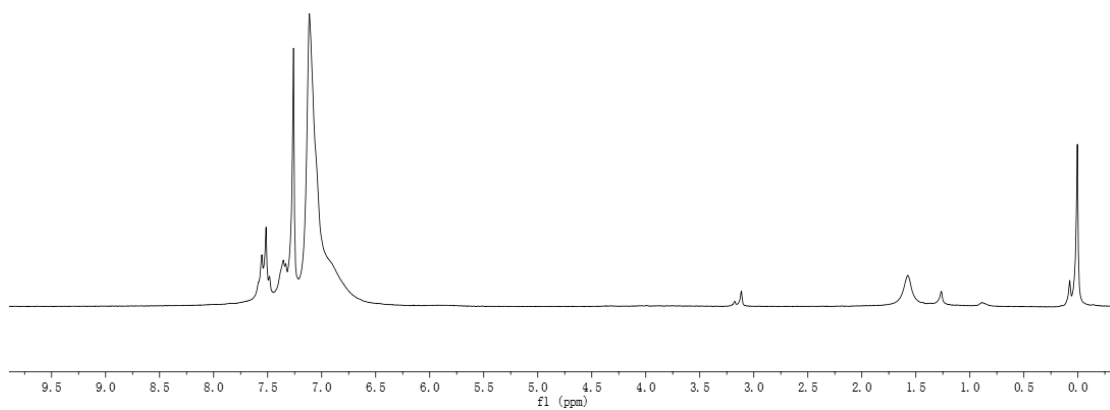

**Figure S39.** <sup>1</sup>H NMR spectrum of polymer in Table 5, entry 4 (400MHz, CDCl<sub>3</sub>, 25°C).

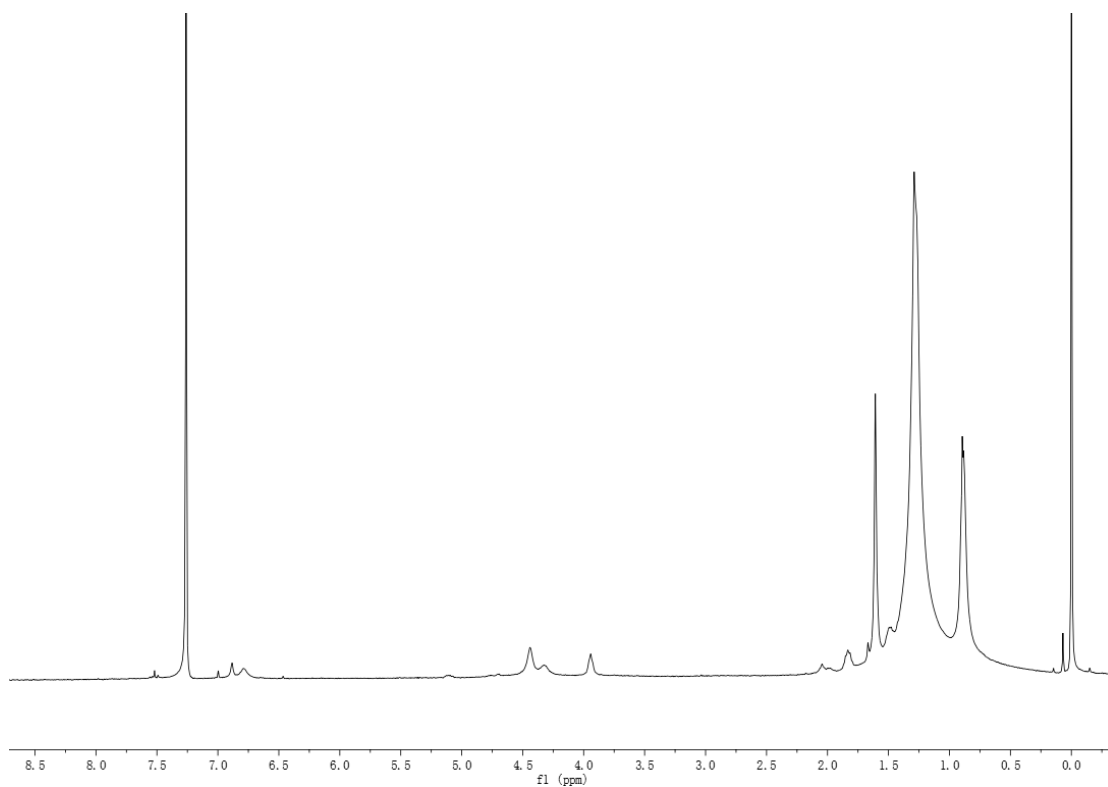

**Figure S40.** <sup>1</sup>H NMR spectrum of polymer in Table 5, entry 2 (400MHz, CDCl<sub>3</sub>, 25°C).

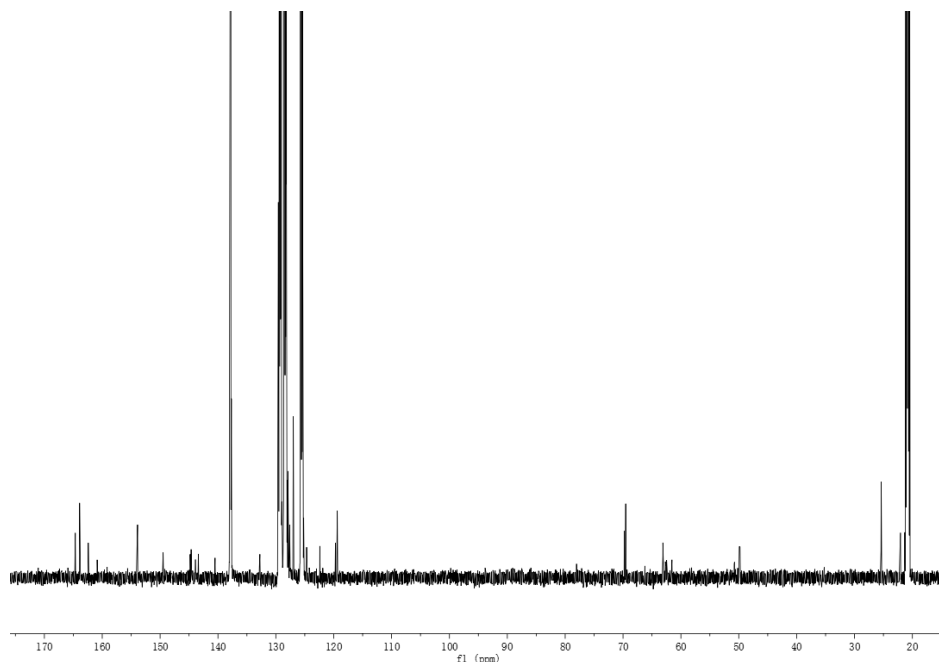

**Figure S41.**  $^{13}\text{C}$  NMR spectra of **3b**/PA mixture with a molar ratio of 1 : 0.3 in Toluene- $d_8$ .

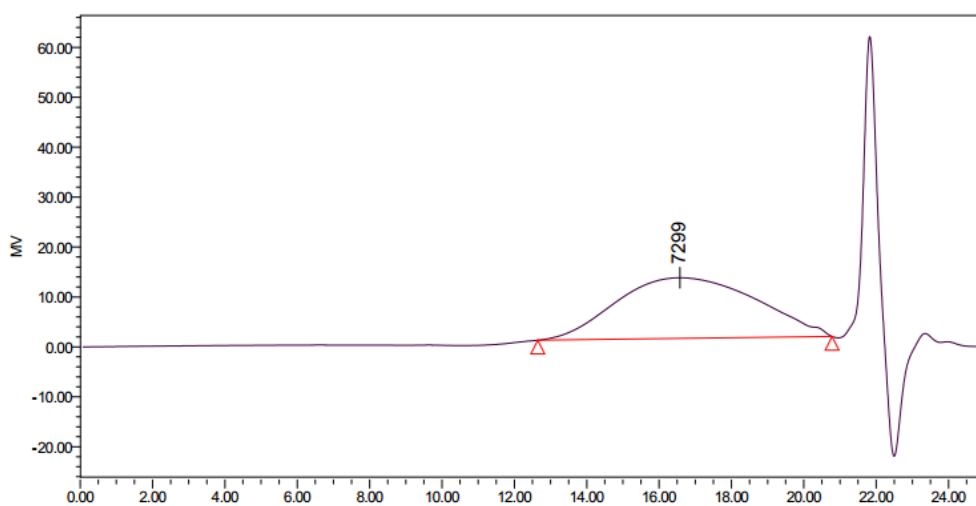

**GPC Results**

| Dist Name | Elution Volume (ml) | Retention Time (min) | Adjusted RT (min) | Mn   | Mw   | MP   | Mz    | Mz+1  | Mz/Mw    | Mz+1/Mw  |
|-----------|---------------------|----------------------|-------------------|------|------|------|-------|-------|----------|----------|
| 1         | 16.577              | 16.577               | 16.577            | 3191 | 8781 | 7299 | 16226 | 24175 | 1.847981 | 2.753294 |

**Figure S42.** GPC curve of polymer in Table 3, entry 1.

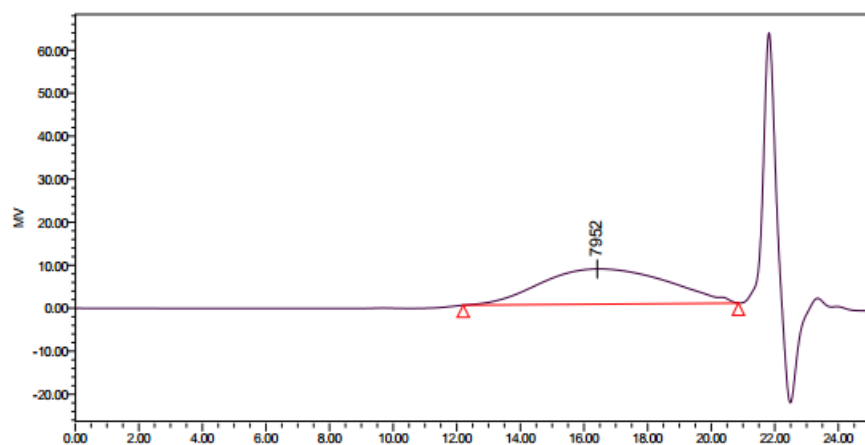

GPC Results

| Dist Name | Elution Volume (ml) | Retention Time (min) | Adjusted RT (min) | Mn   | Mw   | MP   | Mz    | Mz+1  | Mz/Mw    | Mz+1/Mw  |
|-----------|---------------------|----------------------|-------------------|------|------|------|-------|-------|----------|----------|
| 1         | 16.417              | 16.417               | 16.417            | 3294 | 9748 | 7952 | 19654 | 32364 | 2.016158 | 3.319944 |

Figure S43. GPC curve of polymer in Table 3, entry 2.

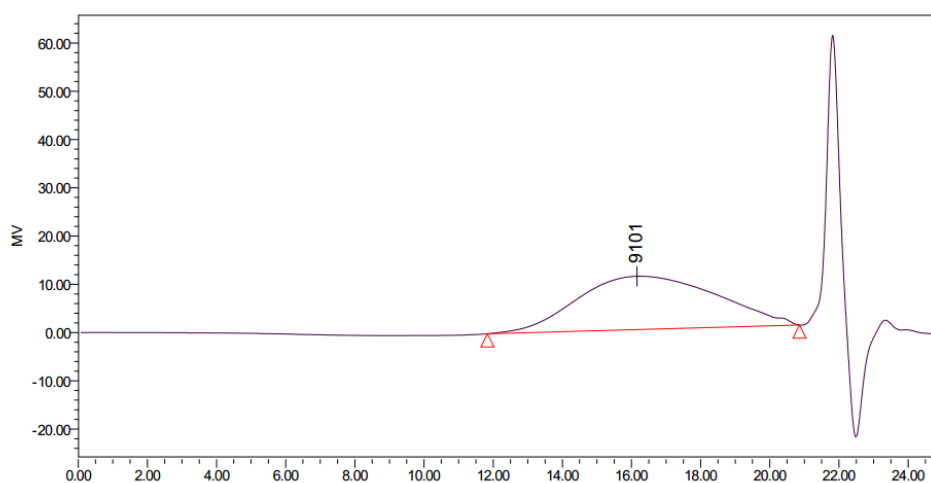

GPC Results

| Dist Name | Elution Volume (ml) | Retention Time (min) | Adjusted RT (min) | Mn   | Mw    | MP   | Mz    | Mz+1  | Mz/Mw    | Mz+1/Mw  |
|-----------|---------------------|----------------------|-------------------|------|-------|------|-------|-------|----------|----------|
| 1         | 16.160              | 16.160               | 16.160            | 3603 | 10950 | 9101 | 23086 | 40918 | 2.108312 | 3.736821 |

Figure S44. GPC curve of polymer in Table 3, entry 3.

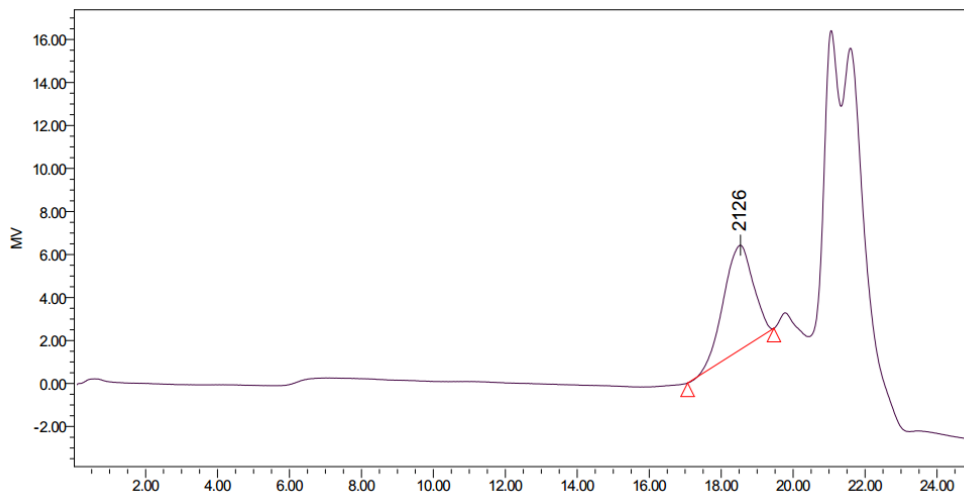

**GPC Results**

| Dist Name | Elution Volume (ml) | Retention Time (min) | Adjusted RT (min) | Mn   | Mw   | MP   | Mz   | Mz+1 | Mz/Mw    | Mz+1/Mw  |
|-----------|---------------------|----------------------|-------------------|------|------|------|------|------|----------|----------|
| 1         | 18.538              | 18.538               | 18.538            | 2155 | 2306 | 2126 | 2464 | 2625 | 1.068506 | 1.138230 |

**Figure S45.** GPC curve of polymer in Table 3, entry 4.

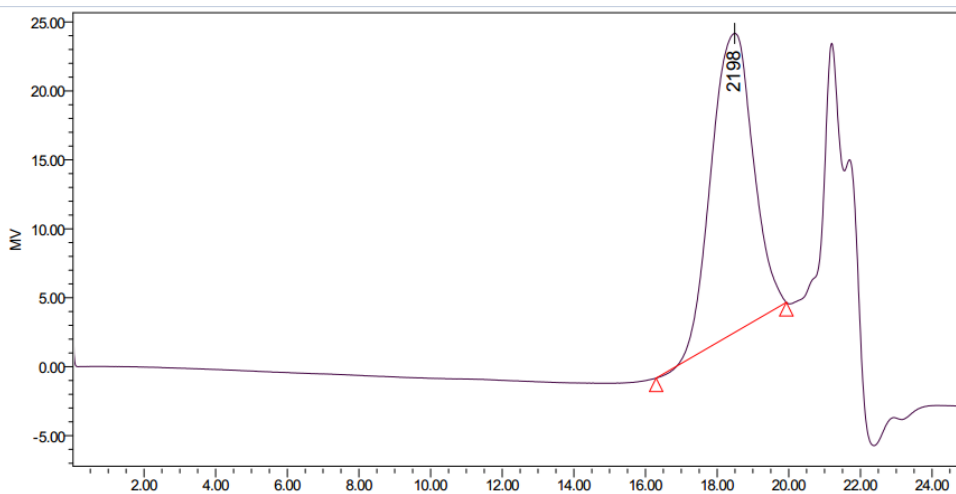

**GPC Results**

| Dist Name | Elution Volume (ml) | Retention Time (min) | Adjusted RT (min) | Mn   | Mw   | MP   | Mz   | Mz+1 | Mz/Mw    | Mz+1/Mw  |
|-----------|---------------------|----------------------|-------------------|------|------|------|------|------|----------|----------|
| 1         | 18.492              | 18.492               | 18.492            | 2122 | 2426 | 2198 | 2734 | 3036 | 1.127102 | 1.251390 |

**Figure S46.** GPC curve of polymer in Table 3, entry 5.



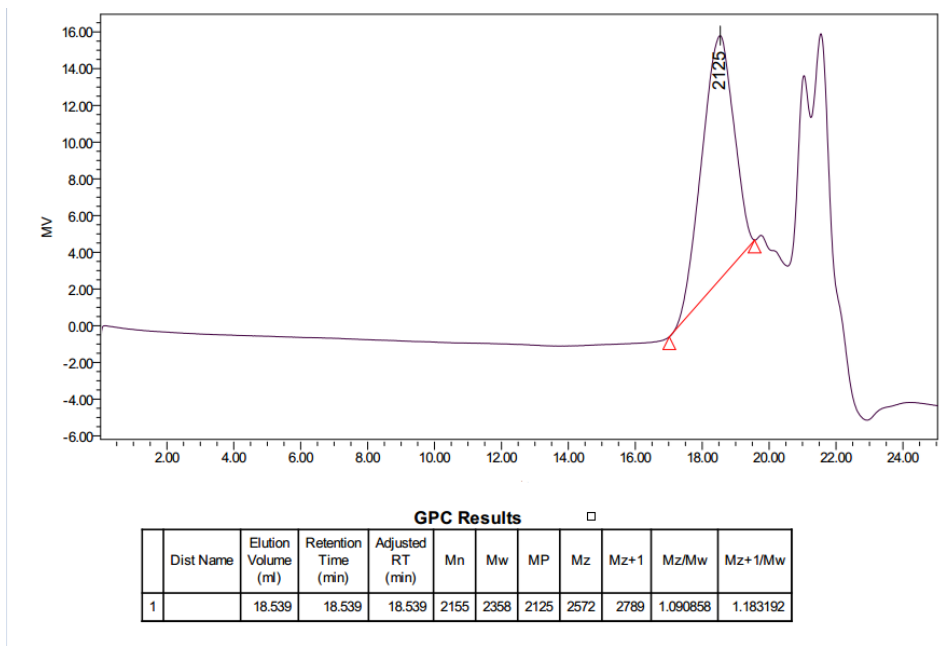

**Figure S47.** GPC curve of polymer in Table 3, entry 6.

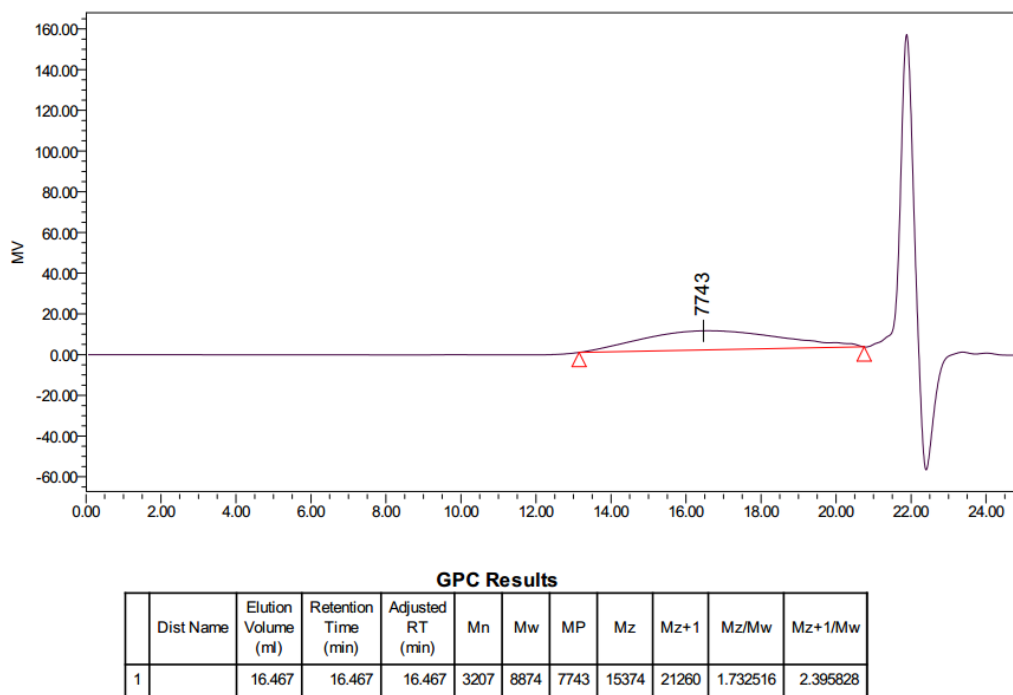

**Figure S48.** GPC curve of polymer in Table 3, entry 7.

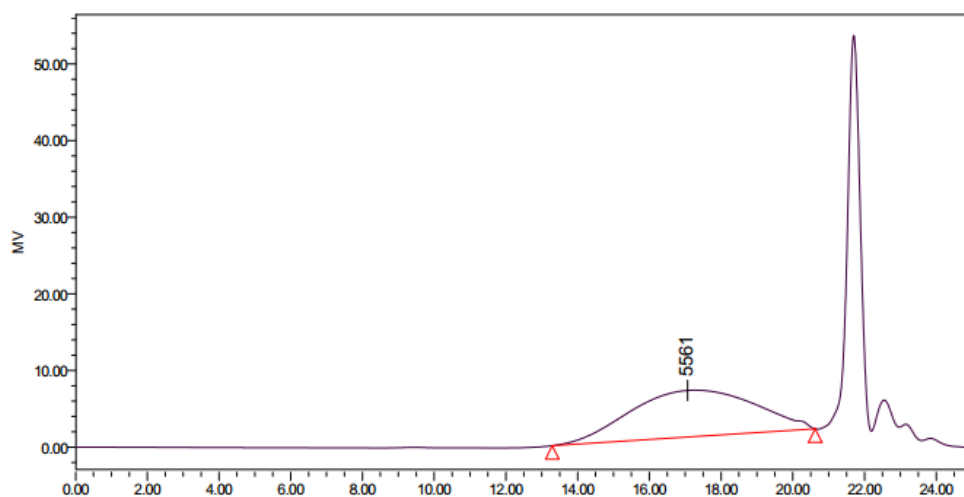

**GPC Results**

| Dist Name | Elution Volume (ml) | Retention Time (min) | Adjusted RT (min) | Mn   | Mw   | MP   | Mz    | Mz+1  | Mz/Mw    | Mz+1/Mw  |
|-----------|---------------------|----------------------|-------------------|------|------|------|-------|-------|----------|----------|
| 1         | 17.067              | 17.067               | 17.067            | 2888 | 6720 | 5561 | 11446 | 16075 | 1.703360 | 2.392116 |

**Figure S49.** GPC curve of polymer in Table 3, entry 8.

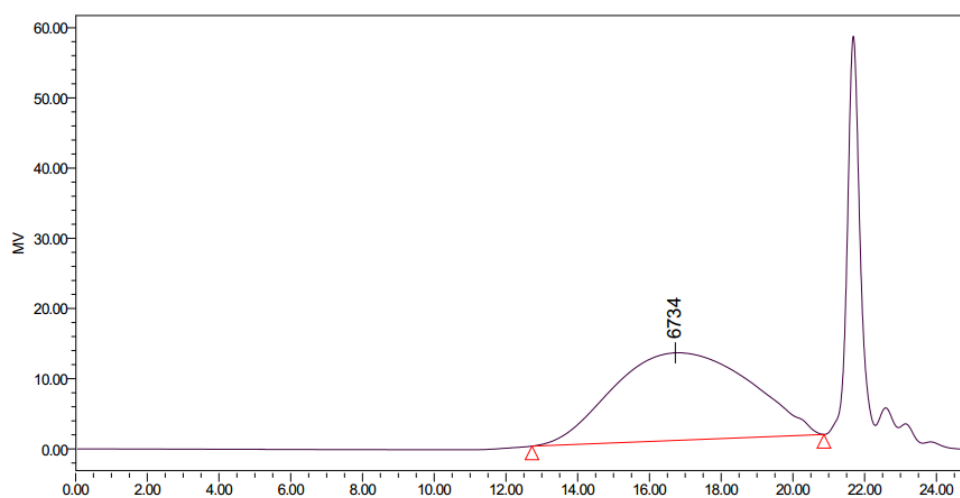

**GPC Results**

| Dist Name | Elution Volume (ml) | Retention Time (min) | Adjusted RT (min) | Mn   | Mw   | MP   | Mz    | Mz+1  | Mz/Mw    | Mz+1/Mw  |
|-----------|---------------------|----------------------|-------------------|------|------|------|-------|-------|----------|----------|
| 1         | 16.725              | 16.725               | 16.725            | 3070 | 8162 | 6734 | 14917 | 21983 | 1.827480 | 2.693177 |

**Figure S50.** GPC curve of polymer in Table 3, entry 9.

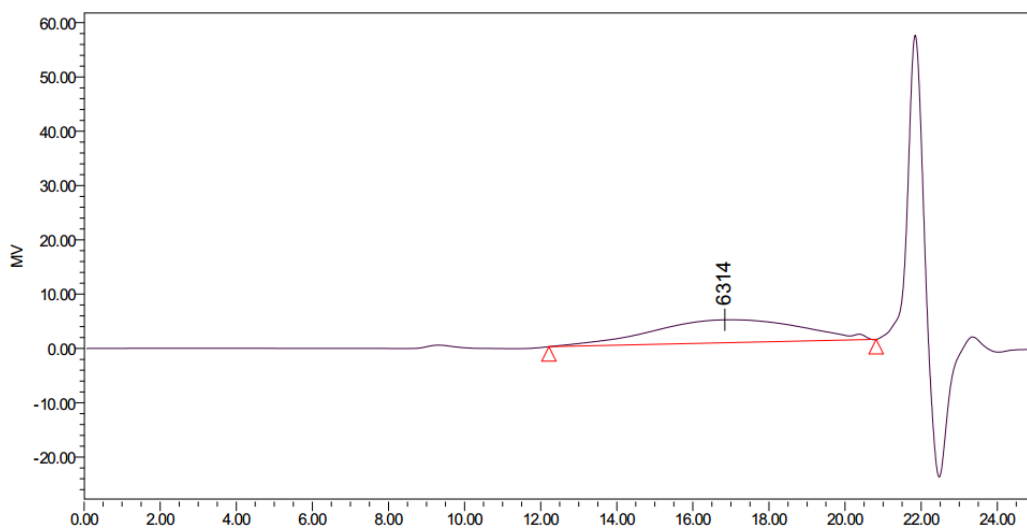

**GPC Results**

| Dist Name | Elution Volume (ml) | Retention Time (min) | Adjusted RT (min) | Mn   | Mw   | MP   | Mz    | Mz+1  | Mz/Mw    | Mz+1/Mw  |
|-----------|---------------------|----------------------|-------------------|------|------|------|-------|-------|----------|----------|
| 1         | 16.842              | 16.842               | 16.842            | 3045 | 9381 | 6314 | 21336 | 37756 | 2.274297 | 4.024623 |

**Figure S51.** GPC curve of polymer in Table 3, entry 10.

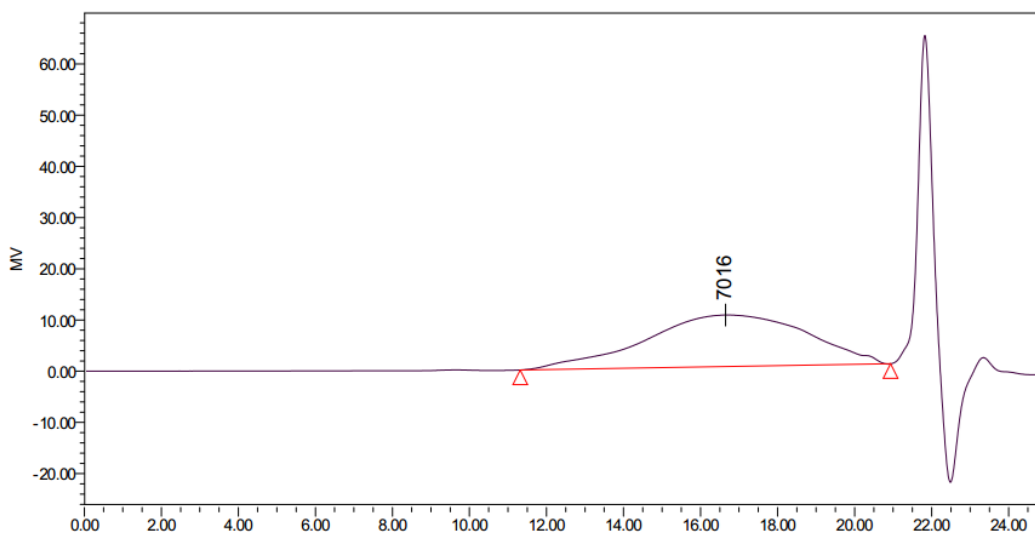

**GPC Results**

| Dist Name | Elution Volume (ml) | Retention Time (min) | Adjusted RT (min) | Mn   | Mw    | MP   | Mz    | Mz+1  | Mz/Mw    | Mz+1/Mw  |
|-----------|---------------------|----------------------|-------------------|------|-------|------|-------|-------|----------|----------|
| 1         | 16.650              | 16.650               | 16.650            | 3379 | 12523 | 7016 | 39372 | 81980 | 3.144061 | 6.546595 |

**Figure S52.** GPC curve of polymer in Table 3, entry 11.

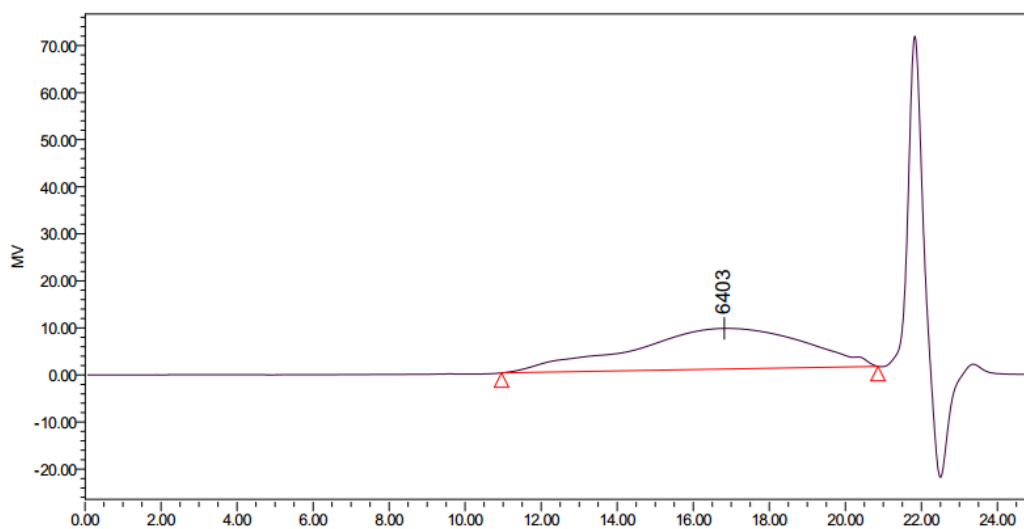

**GPC Results**

| Dist Name | Elution Volume (ml) | Retention Time (min) | Adjusted RT (min) | Mn   | Mw    | MP   | Mz    | Mz+1   | Mz/Mw    | Mz+1/Mw  |
|-----------|---------------------|----------------------|-------------------|------|-------|------|-------|--------|----------|----------|
| 1         | 16.817              | 16.817               | 16.817            | 3180 | 17016 | 6403 | 69702 | 138916 | 4.096275 | 8.163897 |

**Figure S53.** GPC curve of polymer in Table 3, entry 12.

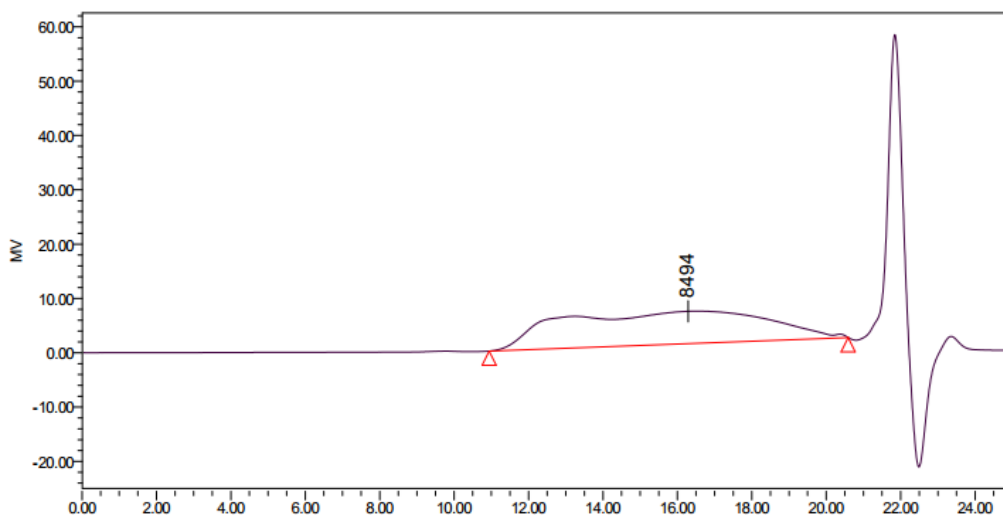

**GPC Results**

| Dist Name | Elution Volume (ml) | Retention Time (min) | Adjusted RT (min) | Mn   | Mw    | MP   | Mz    | Mz+1   | Mz/Mw    | Mz+1/Mw  |
|-----------|---------------------|----------------------|-------------------|------|-------|------|-------|--------|----------|----------|
| 1         | 16.292              | 16.292               | 16.292            | 5396 | 29035 | 8494 | 81298 | 129876 | 2.800050 | 4.473126 |

**Figure S54.** GPC curve of polymer in Table 3, entry 13.

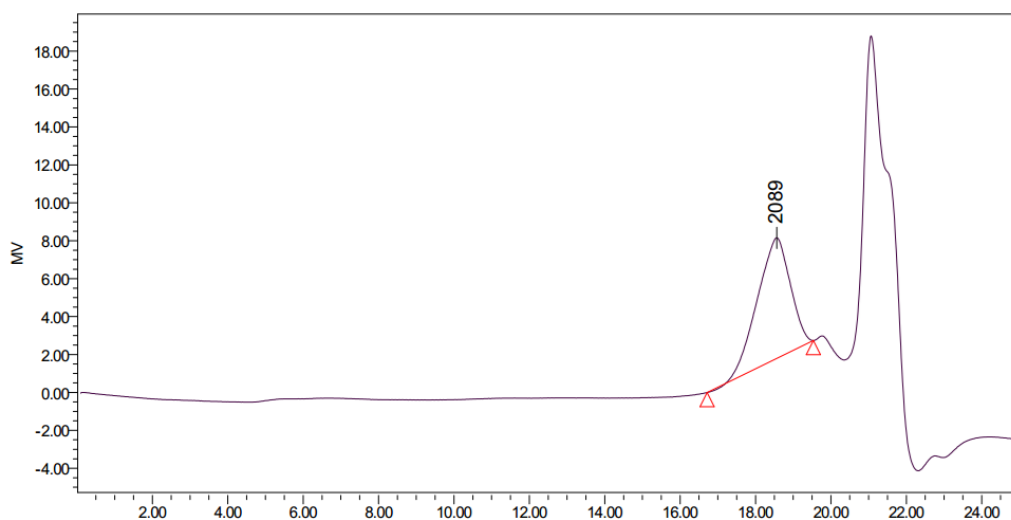

**GPC Results**

| Dist Name | Elution Volume (ml) | Retention Time (min) | Adjusted RT (min) | Mn   | Mw   | MP   | Mz   | Mz+1 | Mz/Mw    | Mz+1/Mw  |
|-----------|---------------------|----------------------|-------------------|------|------|------|------|------|----------|----------|
| 1         | 18.563              | 18.563               | 18.563            | 2154 | 2337 | 2089 | 2535 | 2741 | 1.084663 | 1.172779 |

**Figure S55.** GPC curve of polymer in Table 3, entry 14.

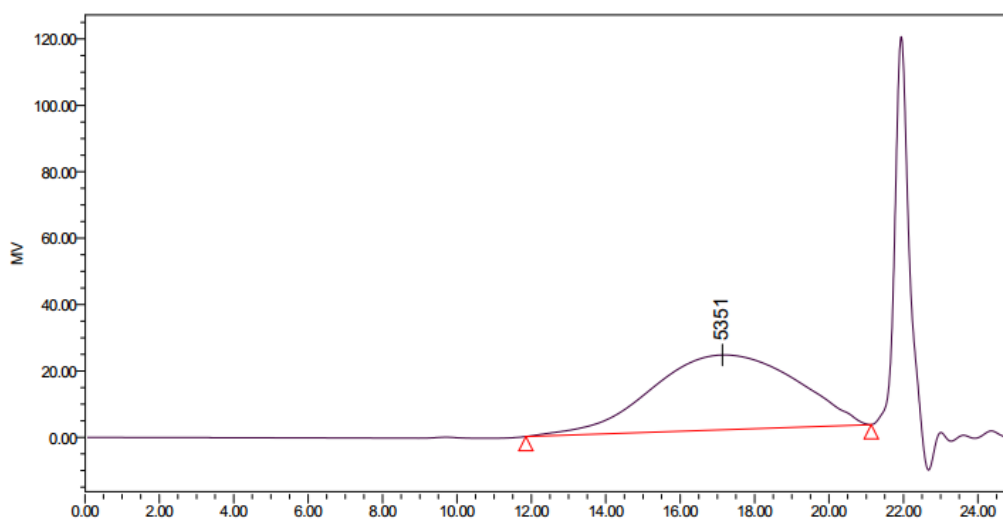

**GPC Results**

| Dist Name | Elution Volume (ml) | Retention Time (min) | Adjusted RT (min) | Mn   | Mw   | MP   | Mz    | Mz+1  | Mz/Mw    | Mz+1/Mw  |
|-----------|---------------------|----------------------|-------------------|------|------|------|-------|-------|----------|----------|
| 1         | 17.133              | 17.133               | 17.133            | 2506 | 8004 | 5351 | 20384 | 43985 | 2.546834 | 5.495524 |

**Figure S56.** GPC curve of polymer in Table 4, entry 1.

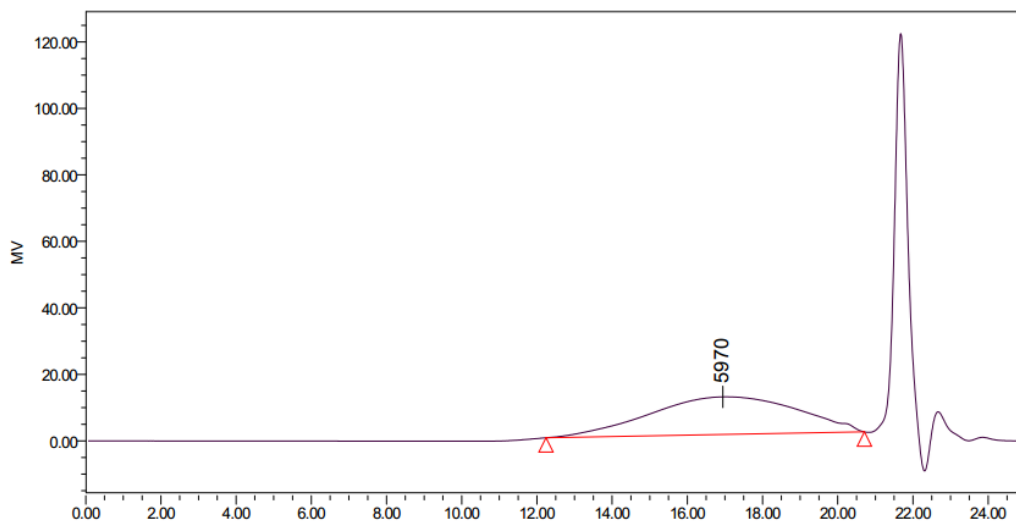

**GPC Results**

| Dist Name | Elution Volume (ml) | Retention Time (min) | Adjusted RT (min) | Mn   | Mw   | MP   | Mz    | Mz+1  | Mz/Mw    | Mz+1/Mw  |
|-----------|---------------------|----------------------|-------------------|------|------|------|-------|-------|----------|----------|
| 1         | 16.942              | 16.942               | 16.942            | 3017 | 8886 | 5970 | 19421 | 33157 | 2.185465 | 3.731227 |

**Figure S57.** GPC curve of polymer in Table 4, entry 2.

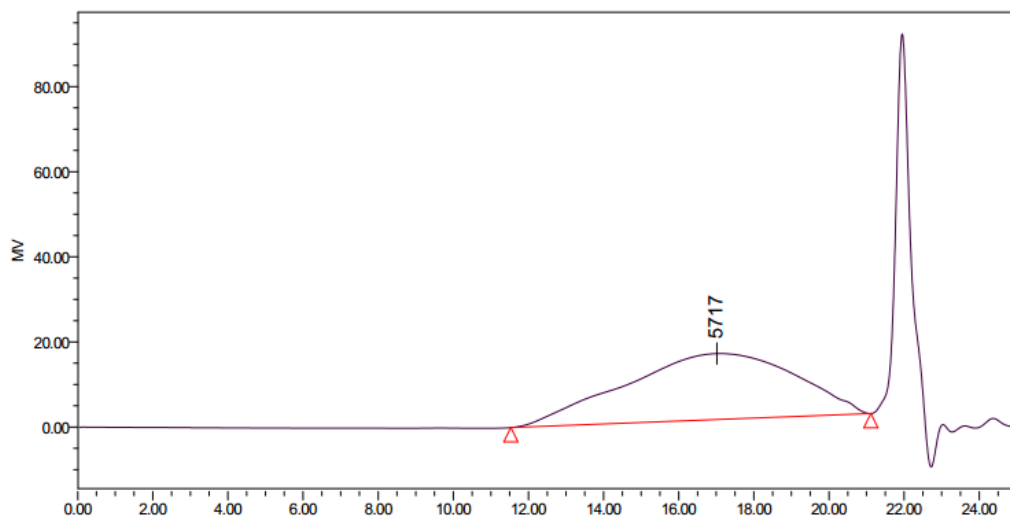

**GPC Results**

| Dist Name | Elution Volume (ml) | Retention Time (min) | Adjusted RT (min) | Mn   | Mw    | MP   | Mz    | Mz+1  | Mz/Mw    | Mz+1/Mw  |
|-----------|---------------------|----------------------|-------------------|------|-------|------|-------|-------|----------|----------|
| 1         | 17.018              | 17.018               | 17.018            | 2807 | 12096 | 5717 | 34656 | 63700 | 2.865002 | 5.266095 |

**Figure S58.** GPC curve of polymer in Table 4, entry 3.

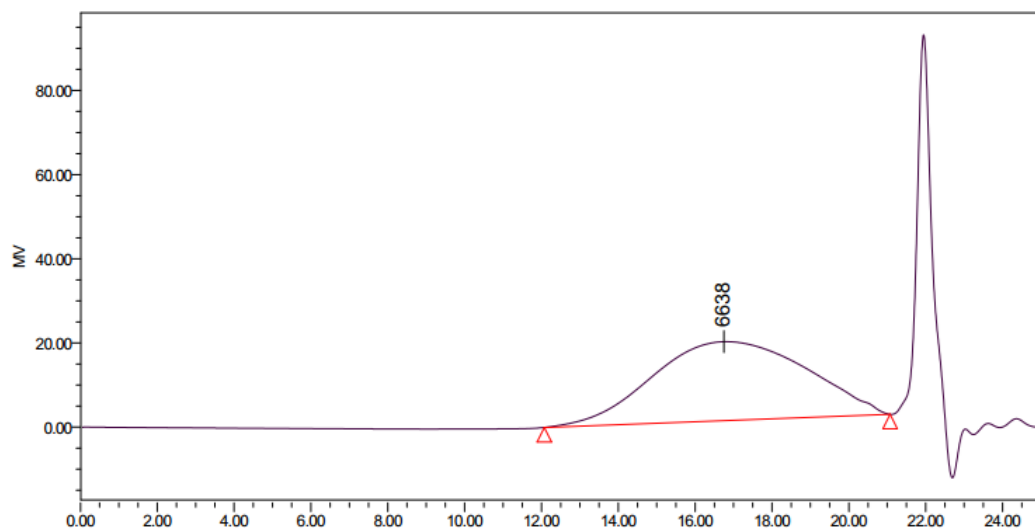

**GPC Results**

| Dist Name | Elution Volume (ml) | Retention Time (min) | Adjusted RT (min) | Mn   | Mw   | MP   | Mz    | Mz+1  | Mz/Mw    | Mz+1/Mw  |
|-----------|---------------------|----------------------|-------------------|------|------|------|-------|-------|----------|----------|
| 1         | 16.751              | 16.751               | 16.751            | 2802 | 8812 | 6638 | 18932 | 33400 | 2.148413 | 3.790262 |

**Figure S59.** GPC curve of polymer in Table 4, entry 4.

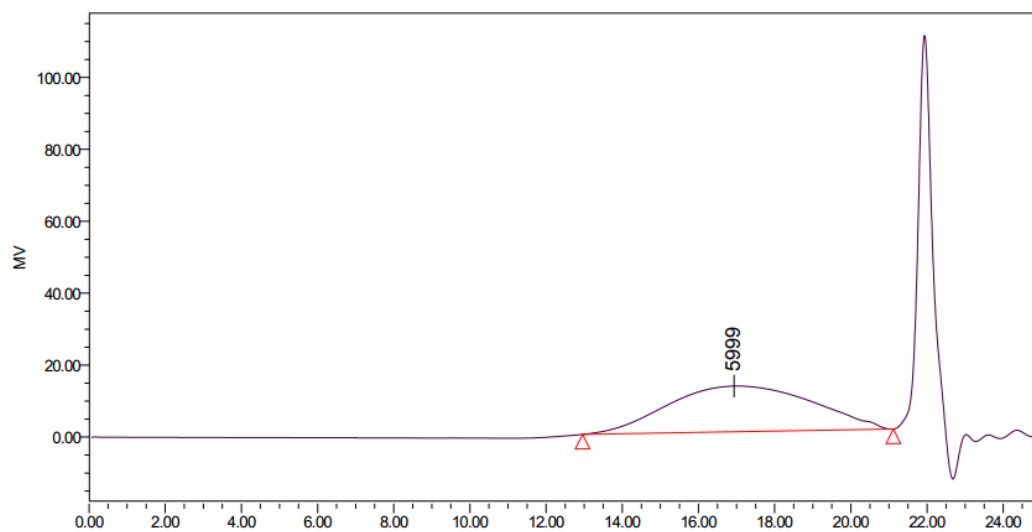

**GPC Results**

| Dist Name | Elution Volume (ml) | Retention Time (min) | Adjusted RT (min) | Mn   | Mw   | MP   | Mz    | Mz+1  | Mz/Mw    | Mz+1/Mw  |
|-----------|---------------------|----------------------|-------------------|------|------|------|-------|-------|----------|----------|
| 1         | 16.933              | 16.933               | 16.933            | 2598 | 7334 | 5999 | 13546 | 19955 | 1.846996 | 2.720852 |

**Figure S60.** GPC curve of polymer in Table 4, entry 5.

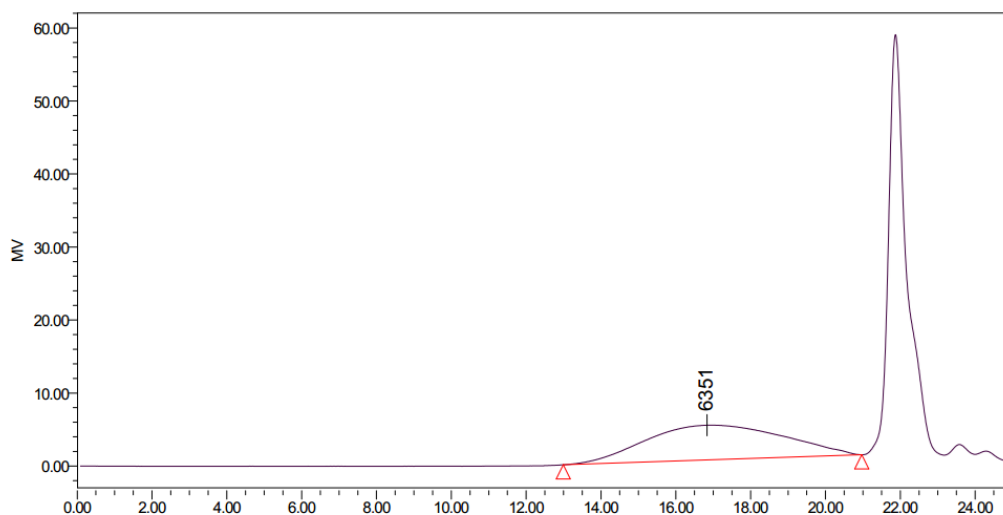

**GPC Results**

| Dist Name | Elution Volume (ml) | Retention Time (min) | Adjusted RT (min) | Mn   | Mw   | MP   | Mz    | Mz+1  | Mz/Mw    | Mz+1/Mw  |
|-----------|---------------------|----------------------|-------------------|------|------|------|-------|-------|----------|----------|
| 1         | 16.833              | 16.833               | 16.833            | 3059 | 7818 | 6351 | 14523 | 21458 | 1.857627 | 2.744627 |

**Figure S61.** GPC curve of polymer in Table 4, entry 6.

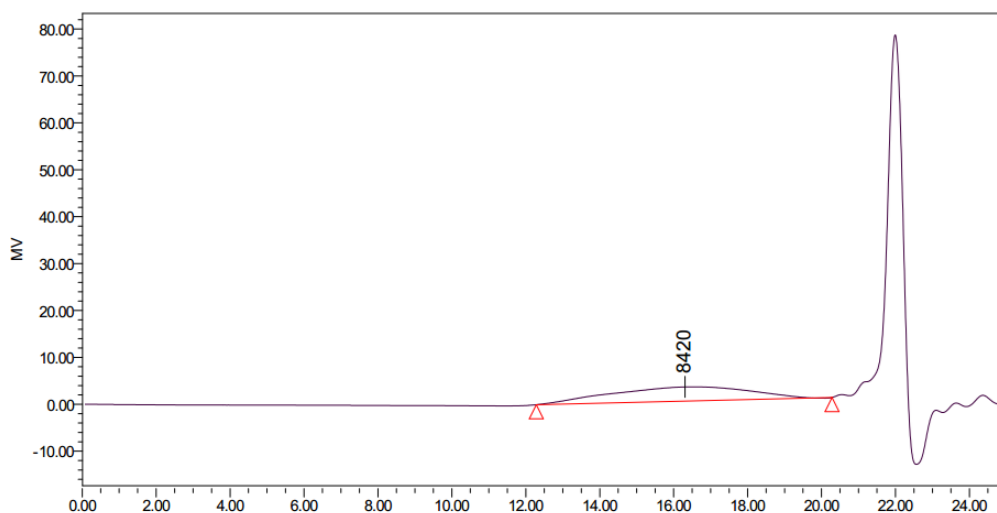

**GPC Results**

| Dist Name | Elution Volume (ml) | Retention Time (min) | Adjusted RT (min) | Mn   | Mw    | MP   | Mz    | Mz+1  | Mz/Mw    | Mz+1/Mw  |
|-----------|---------------------|----------------------|-------------------|------|-------|------|-------|-------|----------|----------|
| 1         | 16.308              | 16.308               | 16.308            | 6283 | 13666 | 8420 | 25912 | 39368 | 1.896079 | 2.880695 |

**Figure S62.** GPC curve of polymer in Table 4, entry 7.



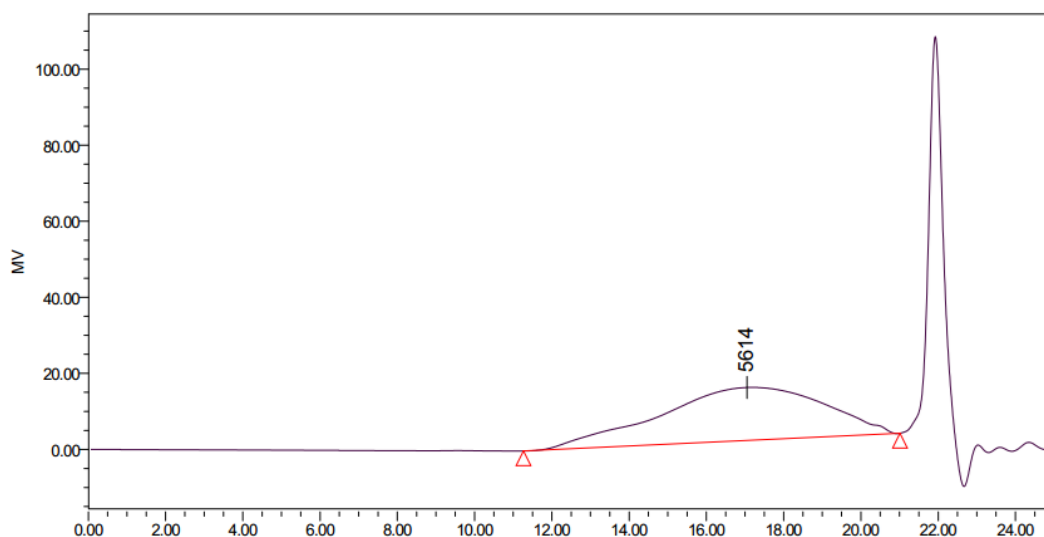

**GPC Results**

| Dist Name | Elution Volume (ml) | Retention Time (min) | Adjusted RT (min) | Mn   | Mw    | MP   | Mz    | Mz+1  | Mz/Mw    | Mz+1/Mw  |
|-----------|---------------------|----------------------|-------------------|------|-------|------|-------|-------|----------|----------|
| 1         | 17.050              | 17.050               | 17.050            | 2972 | 11597 | 5614 | 33929 | 63146 | 2.925666 | 5.444960 |

**Figure S63.** GPC curve of polymer in Table 4, entry 8.

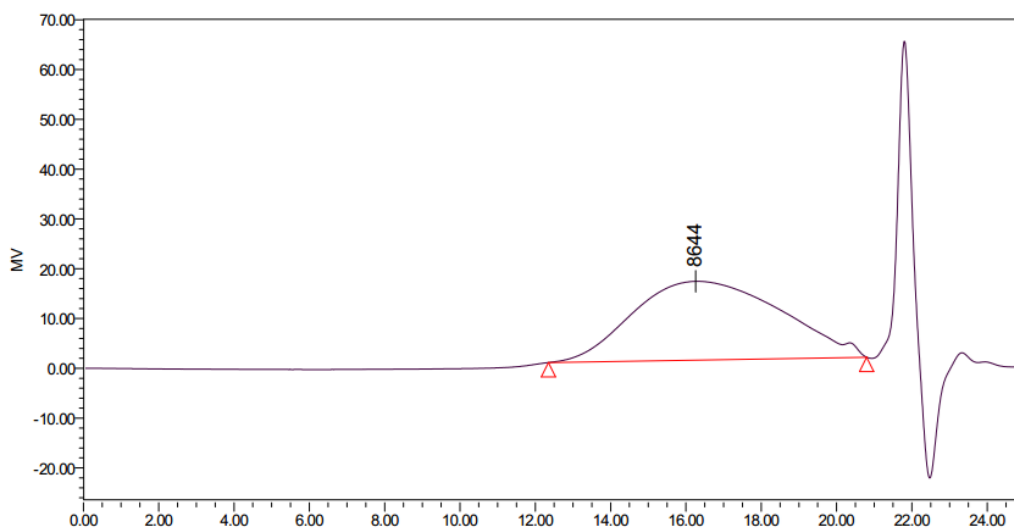

**GPC Results**

| Dist Name | Elution Volume (ml) | Retention Time (min) | Adjusted RT (min) | Mn   | Mw   | MP   | Mz    | Mz+1  | Mz/Mw    | Mz+1/Mw  |
|-----------|---------------------|----------------------|-------------------|------|------|------|-------|-------|----------|----------|
| 1         | 16.258              | 16.258               | 16.258            | 3351 | 9744 | 8644 | 18365 | 28151 | 1.884675 | 2.888922 |

**Figure S64.** GPC curve of polymer in Table 4, entry 9.

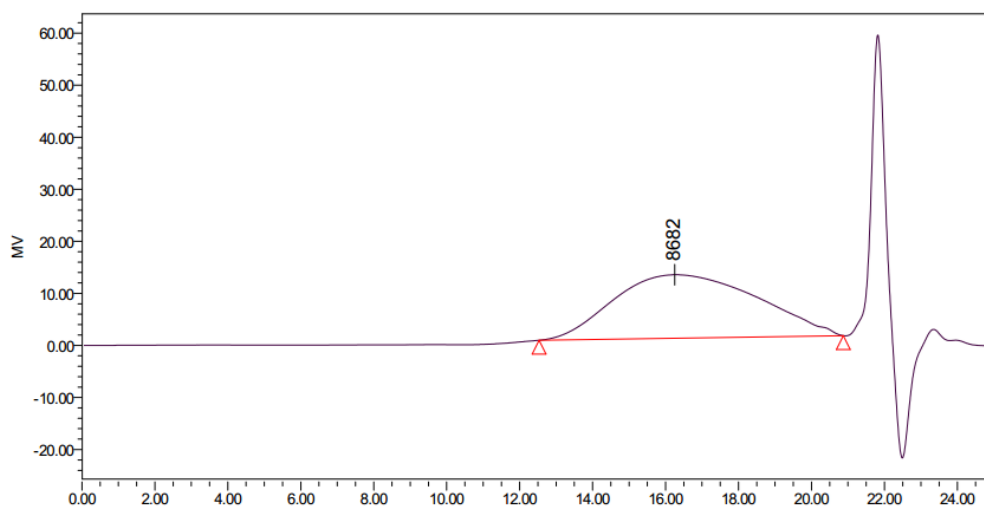

**GPC Results**

| Dist Name | Elution Volume (ml) | Retention Time (min) | Adjusted RT (min) | Mn   | Mw   | MP   | Mz    | Mz+1  | Mz/Mw    | Mz+1/Mw  |
|-----------|---------------------|----------------------|-------------------|------|------|------|-------|-------|----------|----------|
| 1         | 16.250              | 16.250               | 16.250            | 3440 | 9703 | 8682 | 17836 | 26311 | 1.838160 | 2.711656 |

**Figure S65.** GPC curve of polymer in Table 4, entry 10.

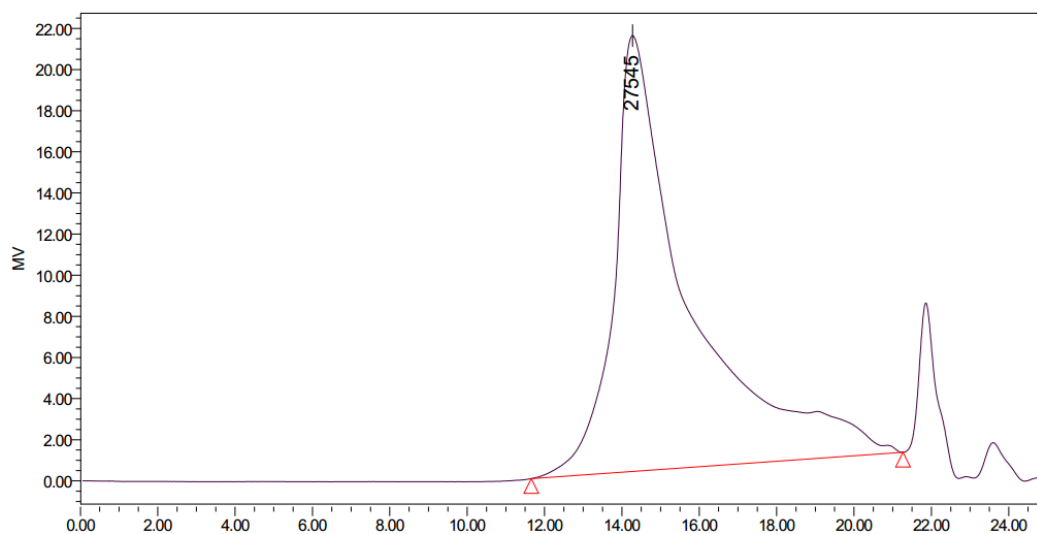

**GPC Results**

| Dist Name | Elution Volume (ml) | Retention Time (min) | Adjusted RT (min) | Mn   | Mw    | MP    | Mz    | Mz+1  | Mz/Mw    | Mz+1/Mw  |
|-----------|---------------------|----------------------|-------------------|------|-------|-------|-------|-------|----------|----------|
| 1         | 14.276              | 14.276               | 14.276            | 6024 | 19962 | 27545 | 31321 | 44679 | 1.569030 | 2.238182 |

**Figure S66.** GPC curve of polymer in Table 4, entry 11.

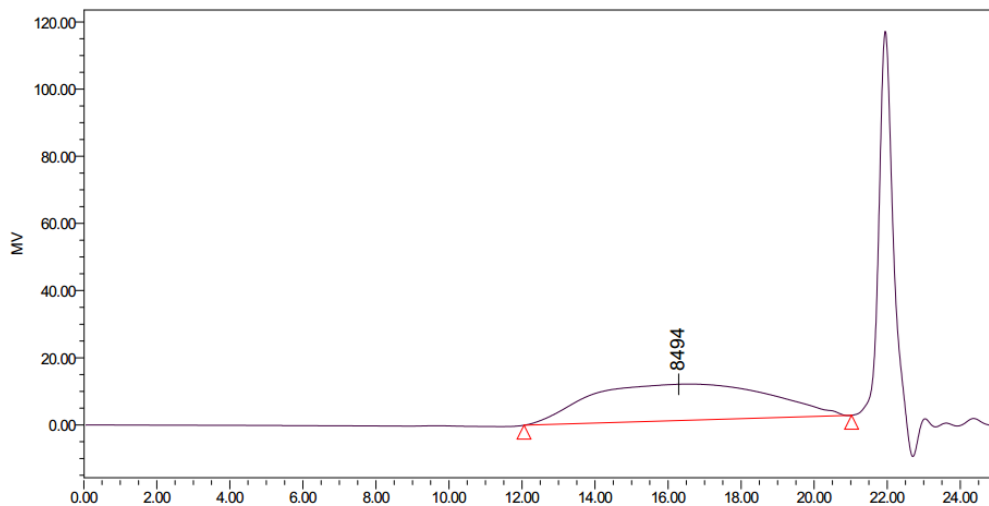

**GPC Results**

|   | Dist Name | Elution Volume (ml) | Retention Time (min) | Adjusted RT (min) | Mn   | Mw    | MP   | Mz    | Mz+1  | Mz/Mw    | Mz+1/Mw  |
|---|-----------|---------------------|----------------------|-------------------|------|-------|------|-------|-------|----------|----------|
| 1 |           | 16.292              | 16.292               | 16.292            | 3596 | 13629 | 8494 | 29382 | 44917 | 2.155938 | 3.295776 |

**Figure S67.** GPC curve of polymer in Table 4, entry 12.

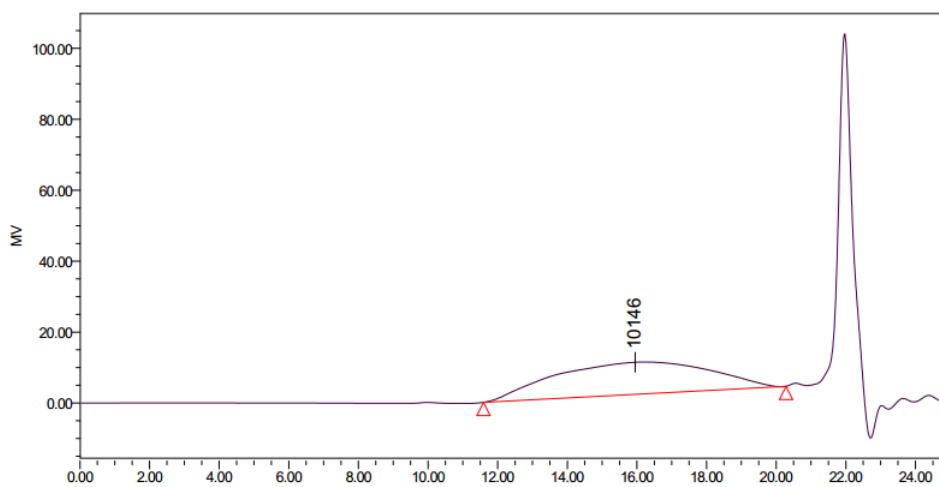

**GPC Results**

|   | Dist Name | Elution Volume (ml) | Retention Time (min) | Adjusted RT (min) | Mn   | Mw    | MP    | Mz    | Mz+1  | Mz/Mw    | Mz+1/Mw  |
|---|-----------|---------------------|----------------------|-------------------|------|-------|-------|-------|-------|----------|----------|
| 1 |           | 15.950              | 15.950               | 15.950            | 6323 | 18617 | 10146 | 42598 | 69364 | 2.288091 | 3.725817 |

**Figure S68.** GPC curve of polymer in Table 4, entry 13.

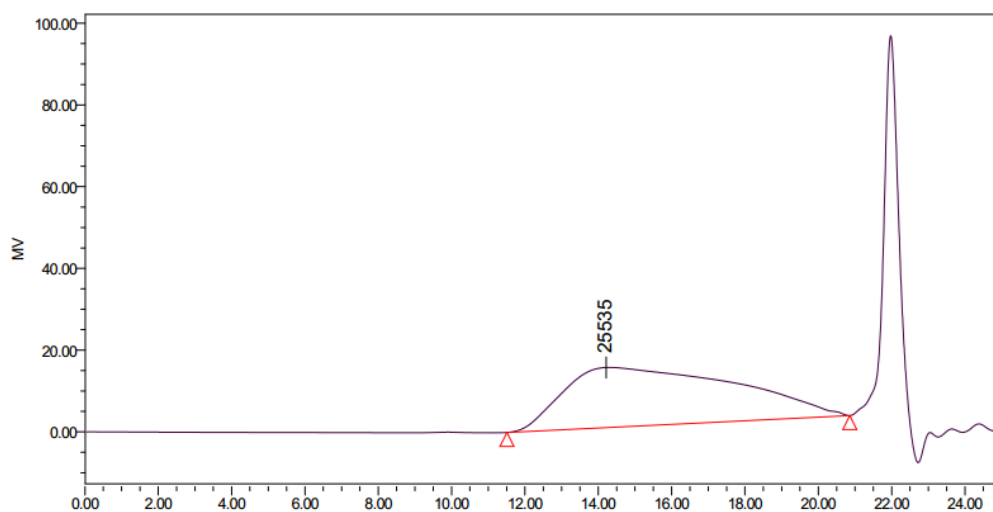

**GPC Results**

| Dist Name | Elution Volume (ml) | Retention Time (min) | Adjusted RT (min) | Mn   | Mw    | MP    | Mz    | Mz+1  | Mz/Mw    | Mz+1/Mw  |
|-----------|---------------------|----------------------|-------------------|------|-------|-------|-------|-------|----------|----------|
| 1         | 14.217              | 14.217               | 14.217            | 4748 | 19247 | 25535 | 41431 | 63718 | 2.152584 | 3.310553 |

**Figure S69.** GPC curve of polymer in Table 4, entry 14.

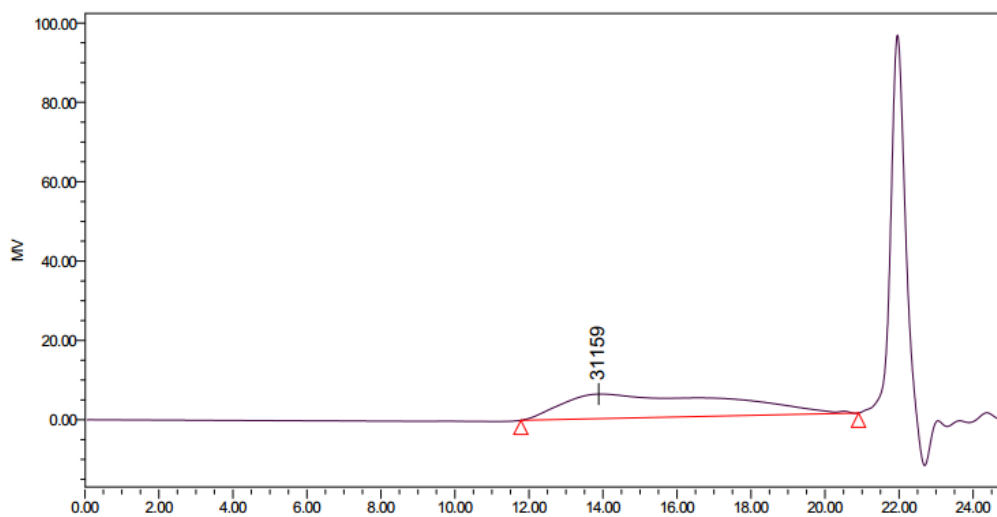

**GPC Results**

| Dist Name | Elution Volume (ml) | Retention Time (min) | Adjusted RT (min) | Mn   | Mw    | MP    | Mz    | Mz+1  | Mz/Mw    | Mz+1/Mw  |
|-----------|---------------------|----------------------|-------------------|------|-------|-------|-------|-------|----------|----------|
| 1         | 13.883              | 13.883               | 13.883            | 5142 | 20526 | 31159 | 43064 | 62951 | 2.098076 | 3.066969 |

**Figure S70.** GPC curve of polymer in Table 4, entry 15.

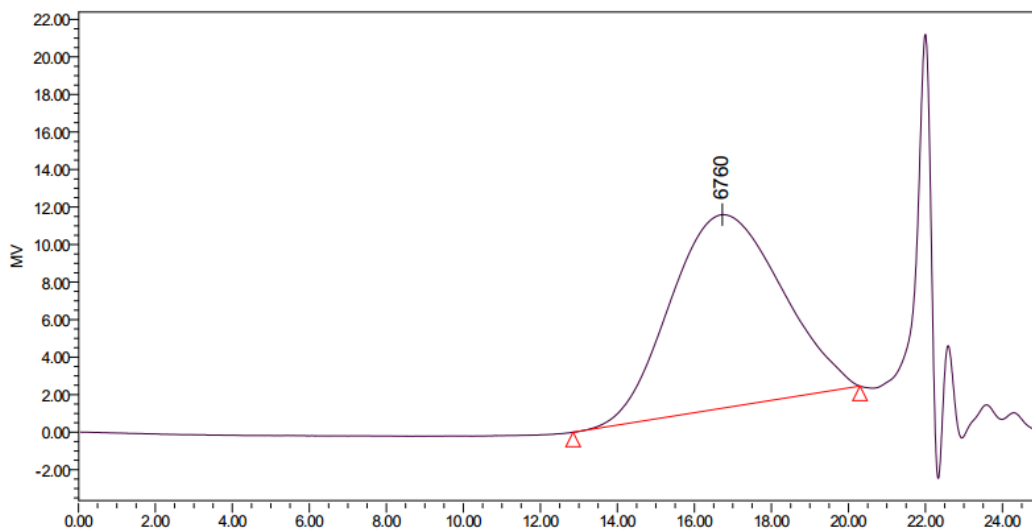

**GPC Results**

| Dist Name | Elution Volume (ml) | Retention Time (min) | Adjusted RT (min) | Mn   | Mw   | MP   | Mz    | Mz+1  | Mz/Mw    | Mz+1/Mw  |
|-----------|---------------------|----------------------|-------------------|------|------|------|-------|-------|----------|----------|
| 1         | 16.726              | 16.726               | 16.726            | 4348 | 7871 | 6760 | 12328 | 17251 | 1.566307 | 2.191665 |

**Figure S71.** GPC curve of polymer in Table 4, entry 16.

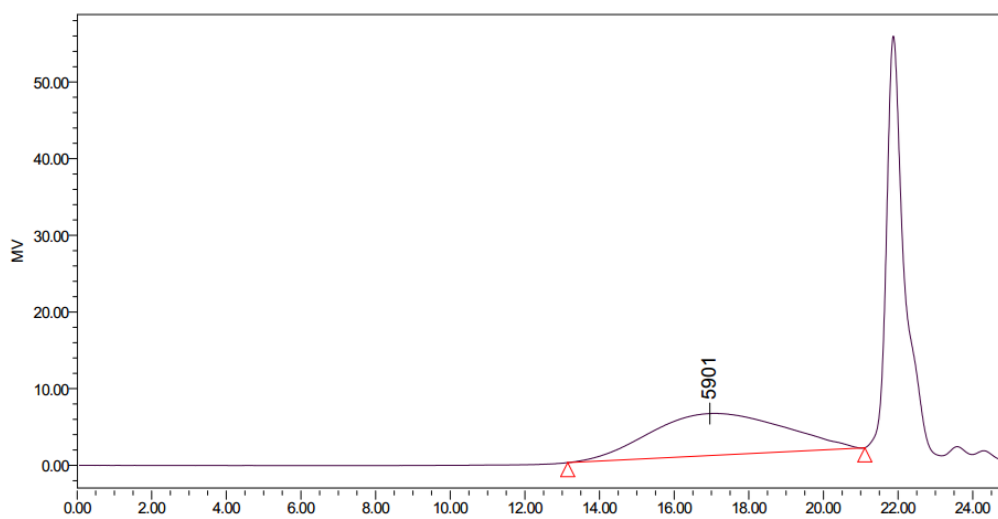

**GPC Results**

| Dist Name | Elution Volume (ml) | Retention Time (min) | Adjusted RT (min) | Mn   | Mw   | MP   | Mz    | Mz+1  | Mz/Mw    | Mz+1/Mw  |
|-----------|---------------------|----------------------|-------------------|------|------|------|-------|-------|----------|----------|
| 1         | 16.958              | 16.958               | 16.958            | 2899 | 7310 | 5901 | 13505 | 20022 | 1.847539 | 2.739131 |

**Figure S72.** GPC curve of polymer in Table 4, entry 17.

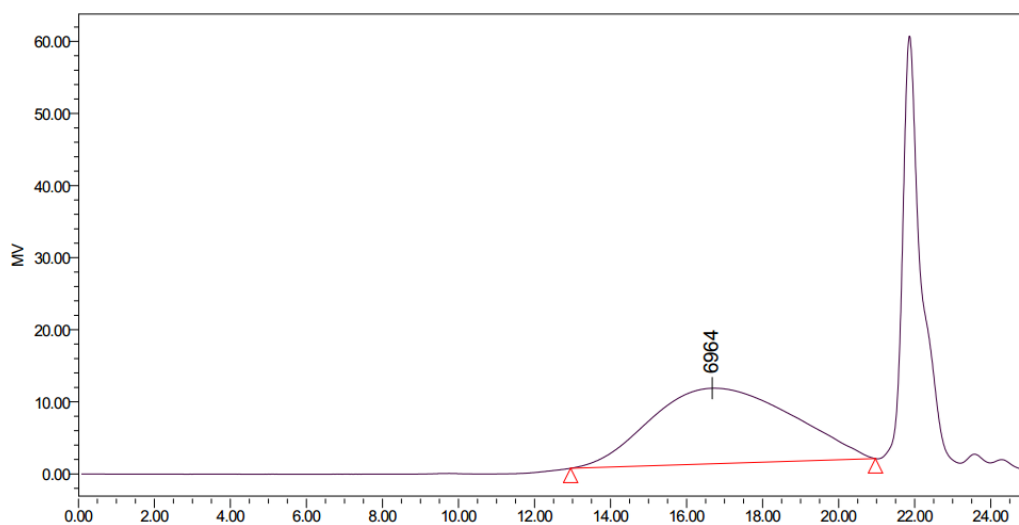

**GPC Results**

| Dist Name | Elution Volume (ml) | Retention Time (min) | Adjusted RT (min) | Mn   | Mw   | MP   | Mz    | Mz+1  | Mz/Mw    | Mz+1/Mw  |
|-----------|---------------------|----------------------|-------------------|------|------|------|-------|-------|----------|----------|
| 1         | 16.675              | 16.675               | 16.675            | 3183 | 8291 | 6964 | 15509 | 23037 | 1.870497 | 2.778526 |

**Figure S73.** GPC curve of polymer in Table 4, entry 18.

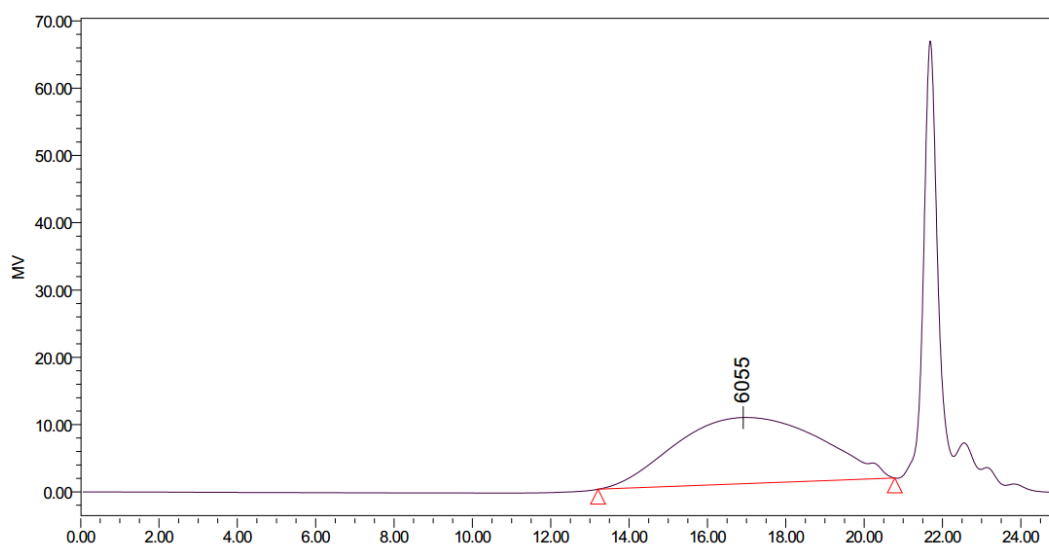

**GPC Results**

| Dist Name | Elution Volume (ml) | Retention Time (min) | Adjusted RT (min) | Mn   | Mw   | MP   | Mz    | Mz+1  | Mz/Mw    | Mz+1/Mw  |
|-----------|---------------------|----------------------|-------------------|------|------|------|-------|-------|----------|----------|
| 1         | 16.917              | 16.917               | 16.917            | 2845 | 7357 | 6055 | 12895 | 18106 | 1.752725 | 2.461013 |

**Figure S74.** GPC curve of polymer in Table 4, entry 19.

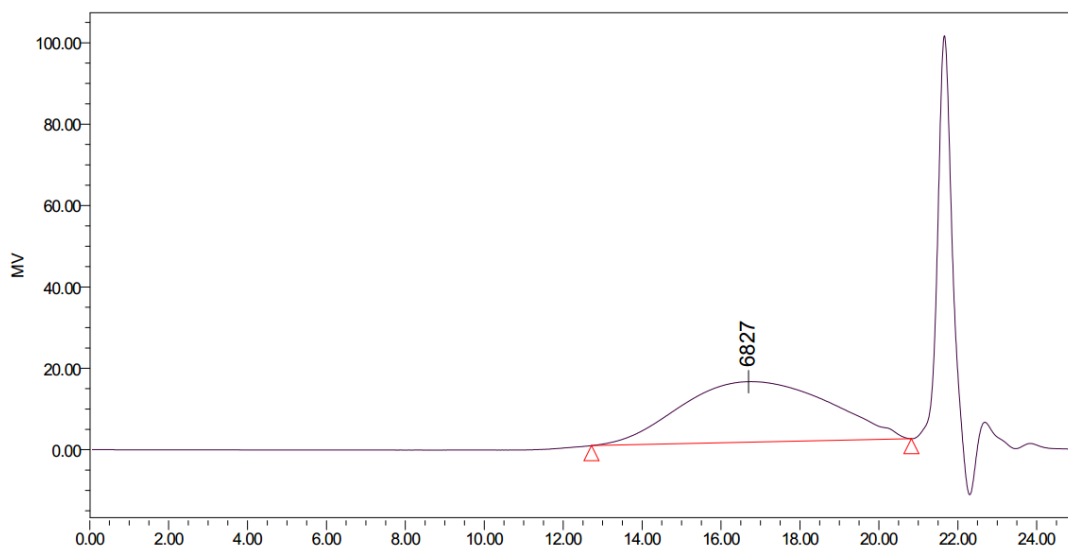

**GPC Results**

| Dist Name | Elution Volume (ml) | Retention Time (min) | Adjusted RT (min) | Mn   | Mw   | MP   | Mz    | Mz+1  | Mz/Mw    | Mz+1/Mw  |
|-----------|---------------------|----------------------|-------------------|------|------|------|-------|-------|----------|----------|
| 1         | 16.700              | 16.700               | 16.700            | 3152 | 8293 | 6827 | 15227 | 22756 | 1.836112 | 2.743918 |

**Figure S75.** GPC curve of polymer in Table 4, entry 20.

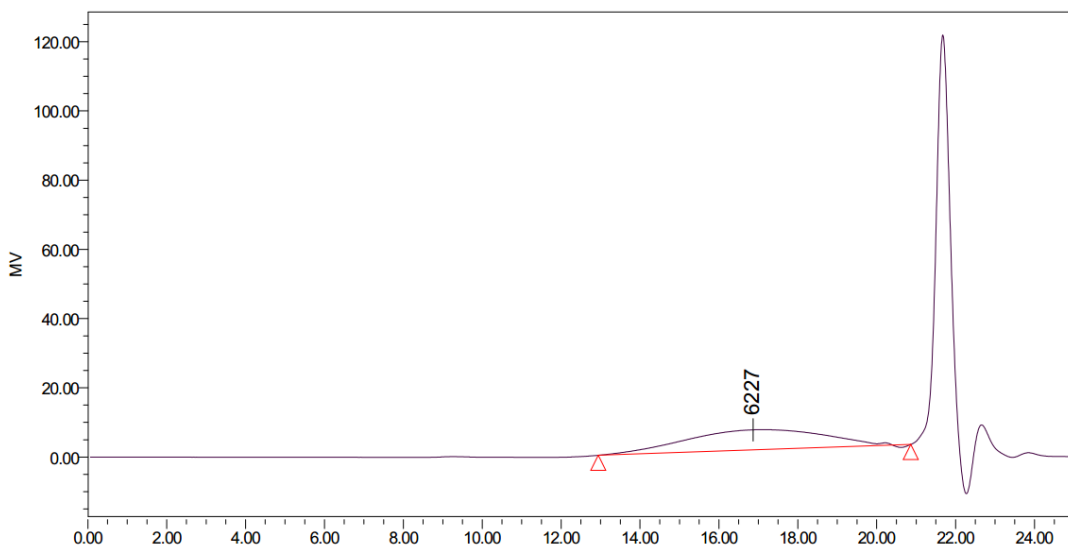

**GPC Results**

| Dist Name | Elution Volume (ml) | Retention Time (min) | Adjusted RT (min) | Mn   | Mw   | MP   | Mz    | Mz+1  | Mz/Mw    | Mz+1/Mw  |
|-----------|---------------------|----------------------|-------------------|------|------|------|-------|-------|----------|----------|
| 1         | 16.867              | 16.867               | 16.867            | 3681 | 8258 | 6227 | 14644 | 21637 | 1.773355 | 2.620170 |

**Figure S76.** GPC curve of polymer in Table 4, entry 21.

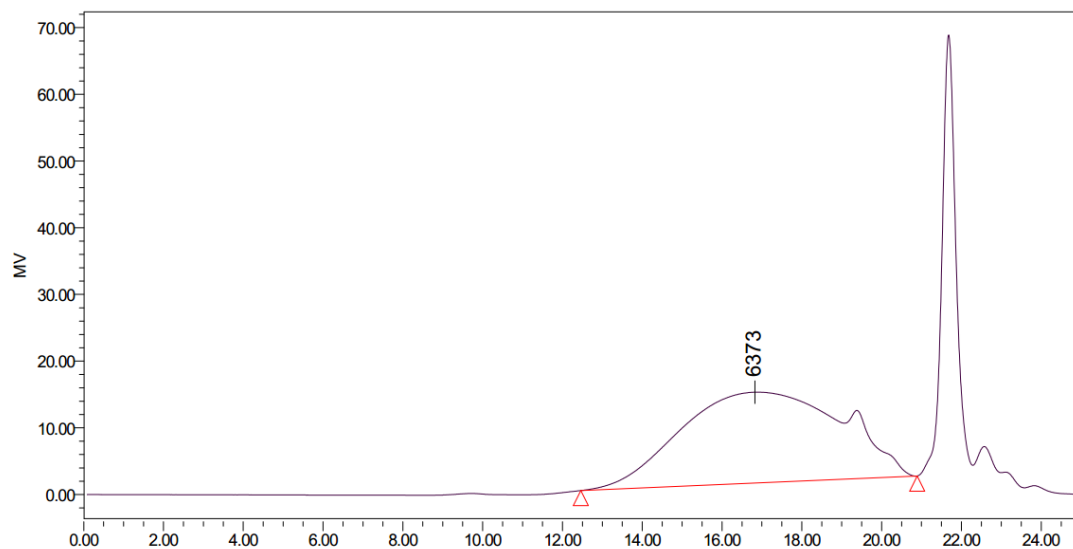

**GPC Results**

| Dist Name | Elution Volume (ml) | Retention Time (min) | Adjusted RT (min) | Mn   | Mw   | MP   | Mz    | Mz+1  | Mz/Mw    | Mz+1/Mw  |
|-----------|---------------------|----------------------|-------------------|------|------|------|-------|-------|----------|----------|
| 1         | 16.825              | 16.825               | 16.825            | 2792 | 8093 | 6373 | 15947 | 24900 | 1.970430 | 3.076596 |

**Figure S77.** GPC curve of polymer in Table 4, entry 22.

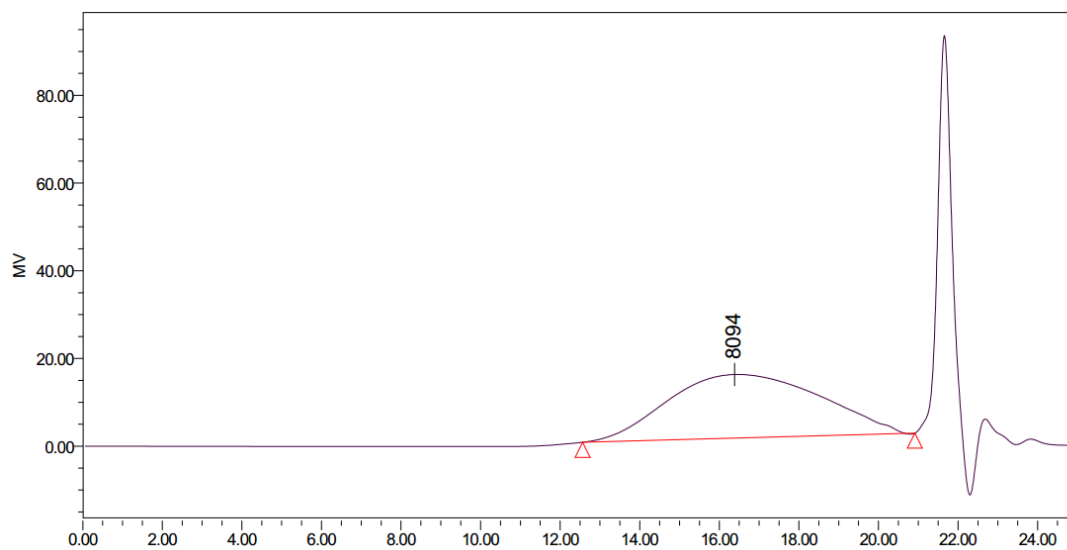

**GPC Results**

| Dist Name | Elution Volume (ml) | Retention Time (min) | Adjusted RT (min) | Mn   | Mw   | MP   | Mz    | Mz+1  | Mz/Mw    | Mz+1/Mw  |
|-----------|---------------------|----------------------|-------------------|------|------|------|-------|-------|----------|----------|
| 1         | 16.383              | 16.383               | 16.383            | 3617 | 9399 | 8094 | 17167 | 25593 | 1.826401 | 2.722768 |

**Figure S78.** GPC curve of polymer in Table 4, entry 23.



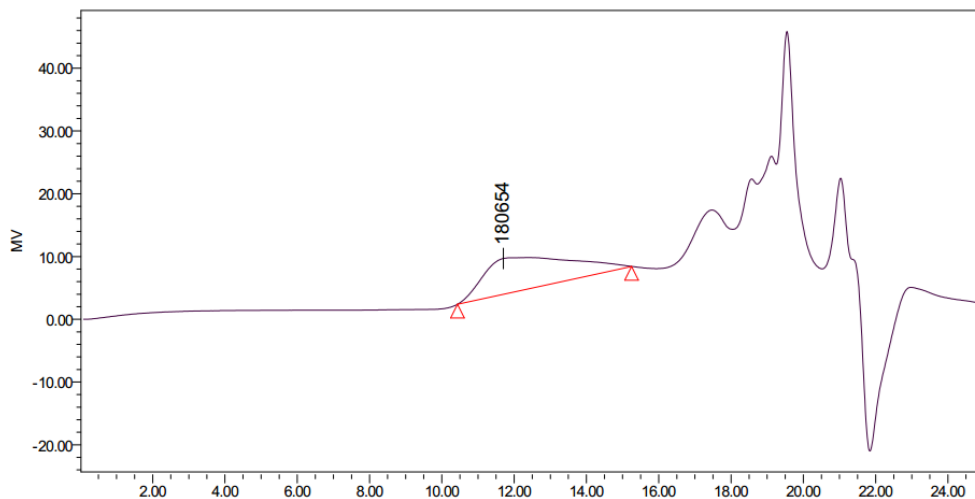

**GPC Results**

| Dist Name | Elution Volume (ml) | Retention Time (min) | Adjusted RT (min) | Mn    | Mw     | MP     | Mz     | Mz+1   | Mz/Mw    |
|-----------|---------------------|----------------------|-------------------|-------|--------|--------|--------|--------|----------|
| 1         | 11.700              | 11.700               | 11.700            | 71961 | 131632 | 180654 | 209387 | 279795 | 1.590697 |

**Figure S79.** GPC curve of polymer in Table 5, entry 1.

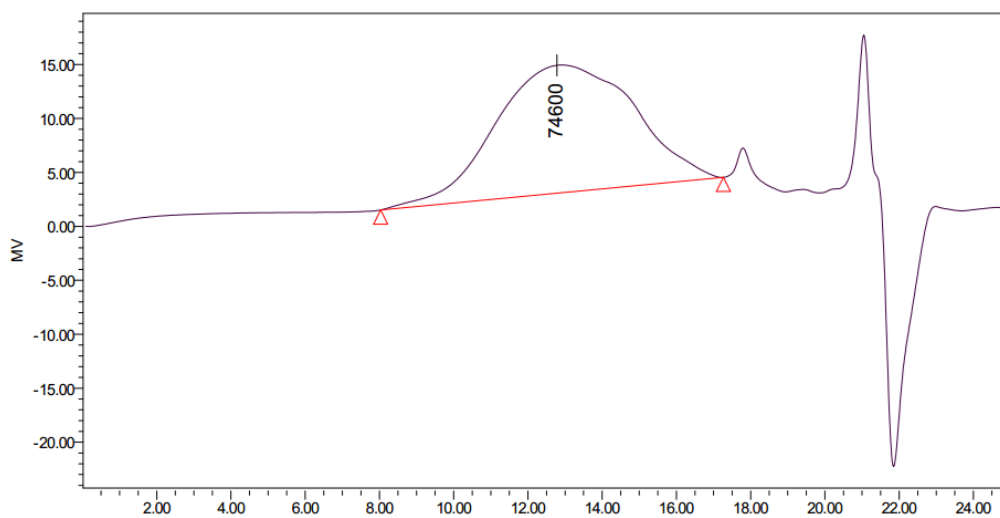

**GPC Results**

| Dist Name | Elution Volume (ml) | Retention Time (min) | Adjusted RT (min) | Mn    | Mw     | MP    | Mz      | Mz+1    | Mz/Mw     |
|-----------|---------------------|----------------------|-------------------|-------|--------|-------|---------|---------|-----------|
| 1         | 12.783              | 12.783               | 12.783            | 40484 | 203456 | 74600 | 2526402 | 7929833 | 12.417431 |

**Figure S80.** GPC curve of polymer in Table 5, entry 2.

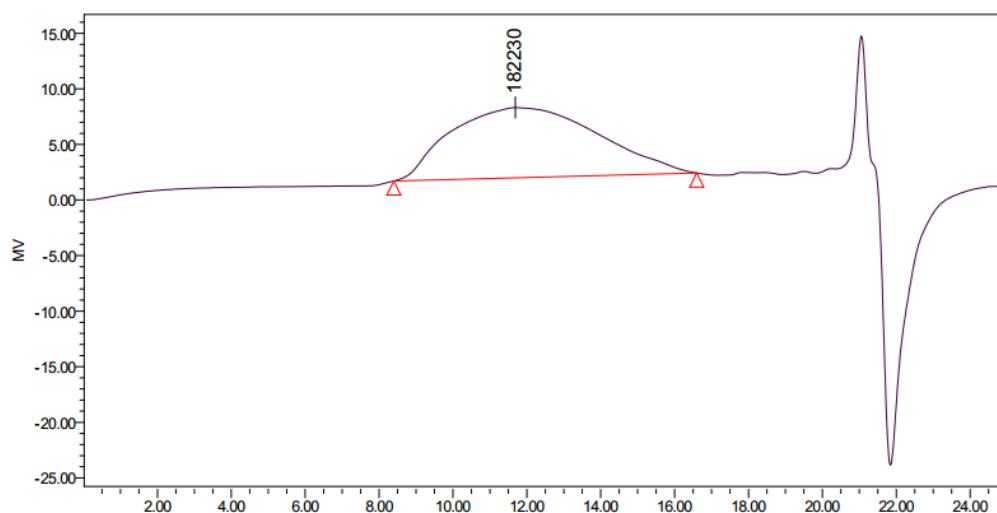

**GPC Results**

| Dist Name | Elution Volume (ml) | Retention Time (min) | Adjusted RT (min) | Mn    | Mw     | MP     | Mz      | Mz+1    | Mz/Mw    |
|-----------|---------------------|----------------------|-------------------|-------|--------|--------|---------|---------|----------|
| 1         | 11.690              | 11.690               | 11.690            | 69958 | 445686 | 182230 | 1911102 | 3604289 | 4.288001 |

**Figure S81.** GPC curve of polymer in Table 5, entry 3.

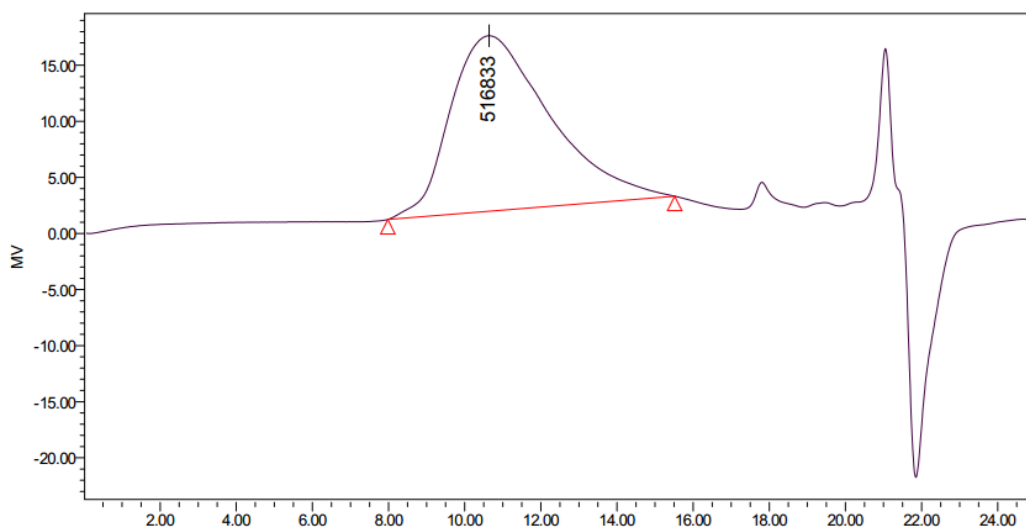

**GPC Results**

| Dist Name | Elution Volume (ml) | Retention Time (min) | Adjusted RT (min) | Mn     | Mw     | MP     | Mz      | Mz+1    | Mz/Mw    |
|-----------|---------------------|----------------------|-------------------|--------|--------|--------|---------|---------|----------|
| 1         | 10.642              | 10.642               | 10.642            | 166502 | 725734 | 516833 | 2710911 | 6672111 | 3.735404 |

**Figure S82.** GPC curve of polymer in Table 5, entry 4

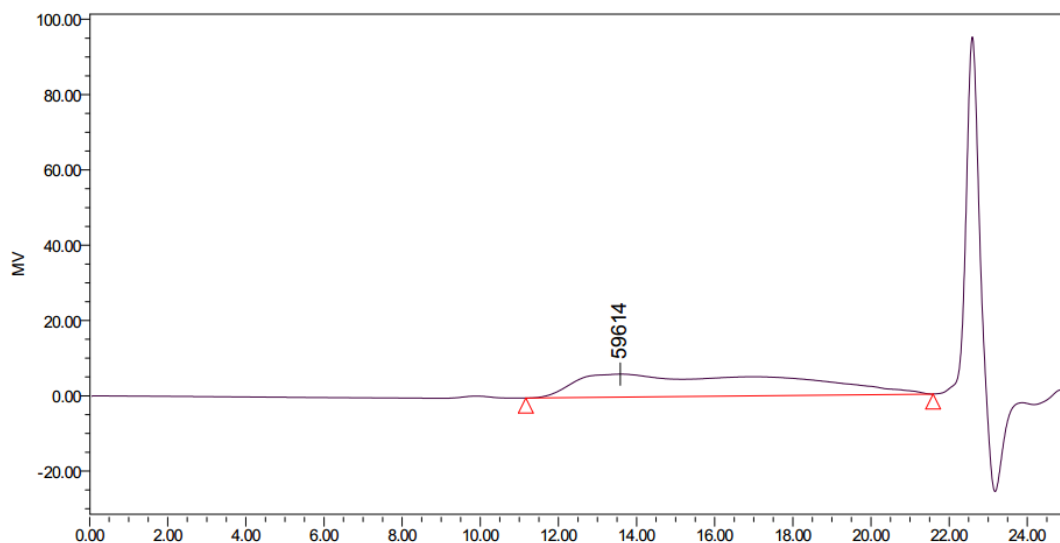

**GPC Results**

|   | Dist Name | Elution Volume (ml) | Retention Time (min) | Adjusted RT (min) | Mn   | Mw    | MP    | Mz    | Mz+1   | Mz/Mw    | Mz+1/Mw  |
|---|-----------|---------------------|----------------------|-------------------|------|-------|-------|-------|--------|----------|----------|
| 1 |           | 13.583              | 13.583               | 13.583            | 7953 | 37218 | 59614 | 92679 | 132465 | 2.490166 | 3.559157 |

**Figure S83.** GPC curve of polymer in Table 5, entry 5

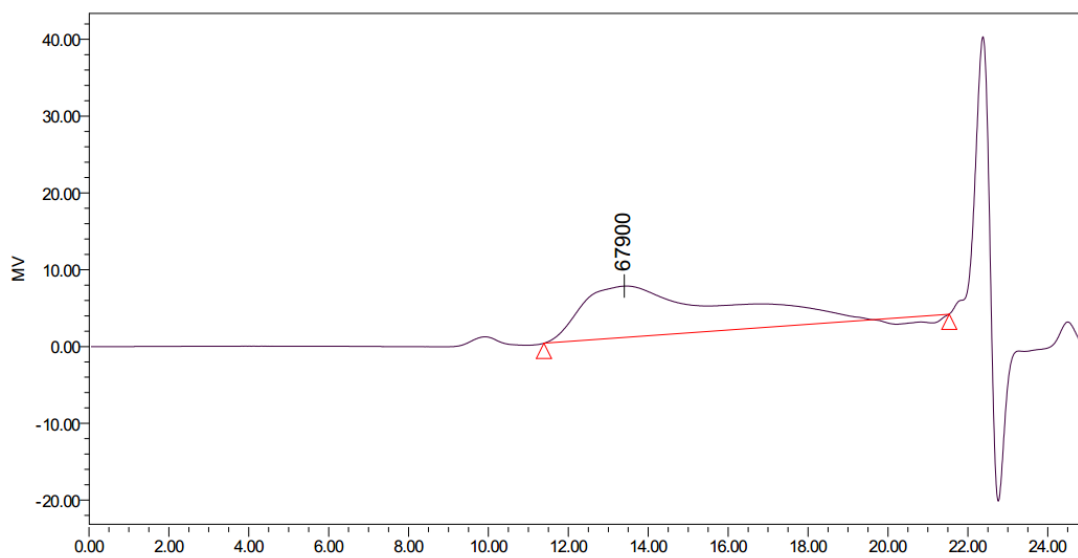

**GPC Results**

|   | Dist Name | Elution Volume (ml) | Retention Time (min) | Adjusted RT (min) | Mn    | Mw    | MP    | Mz     | Mz+1   | Mz/Mw    | Mz+1/Mw  |
|---|-----------|---------------------|----------------------|-------------------|-------|-------|-------|--------|--------|----------|----------|
| 1 |           | 13.400              | 13.400               | 13.400            | 15794 | 53100 | 67900 | 102721 | 138075 | 1.934478 | 2.600282 |

**Figure S84.** GPC curve of polymer in Table 5, entry 6

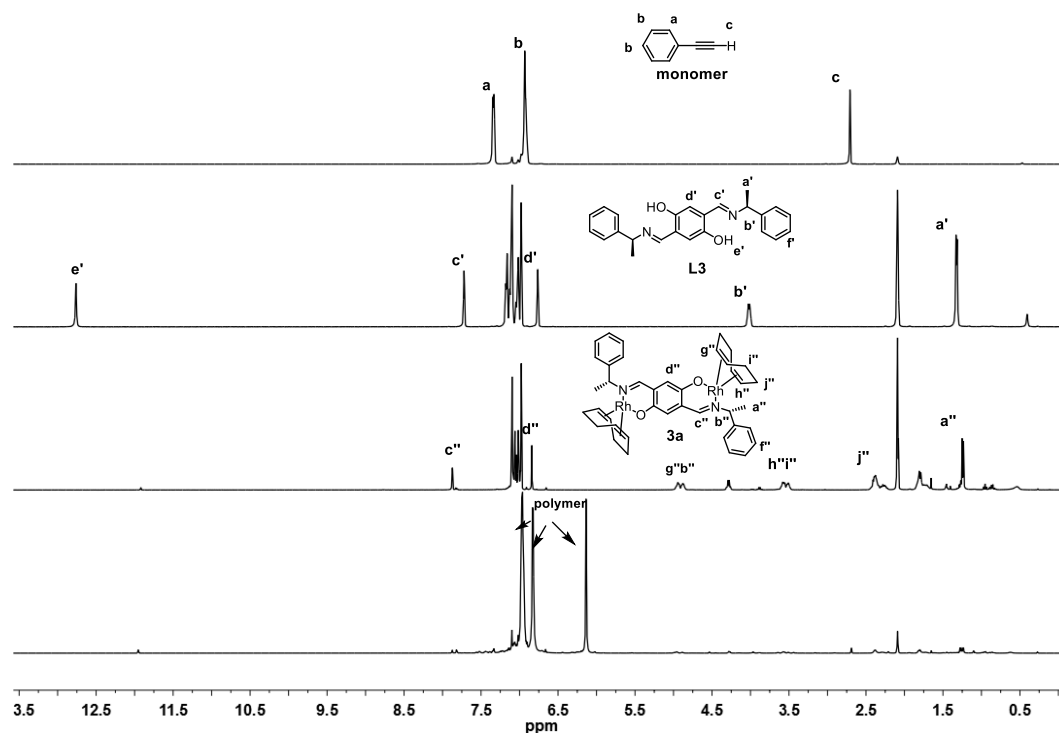

**Figure S85.** *In situ*  $^1\text{H}$  NMR spectra of **3a**/PA mixture with a molar ratio of 1 : 0.3 in Toluene- $d_8$ .

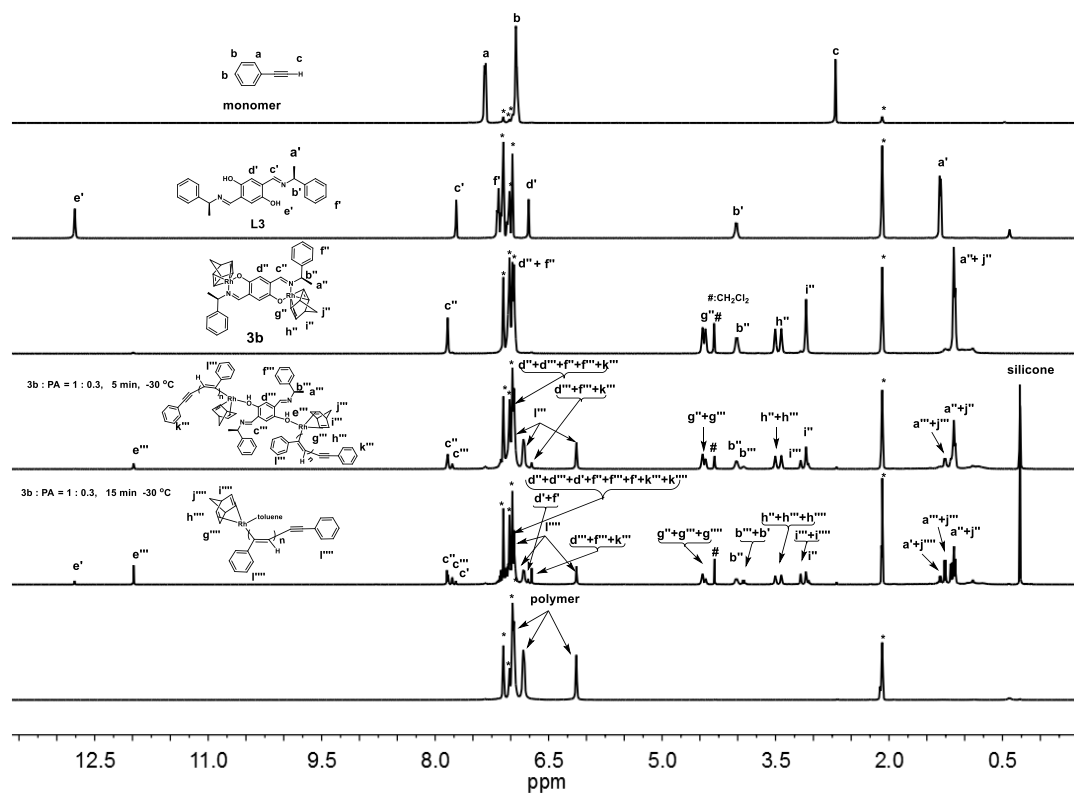

**Figure S86.** *In situ*  $^1\text{H}$  NMR spectra of **3b**/PA mixture with a molar ratio of 1 : 0.3 in Toluene- $d_8$ .

We did the *in situ*  $^1\text{H}$  NMR study on the polymerization mechanism using **3a** and **3b**. (Figure S85, S86) However, the high peaks of PPA in *in situ*  $^1\text{H}$  NMR spectrum mean a hopeless task to

get enough evidence for the true structure of active species.

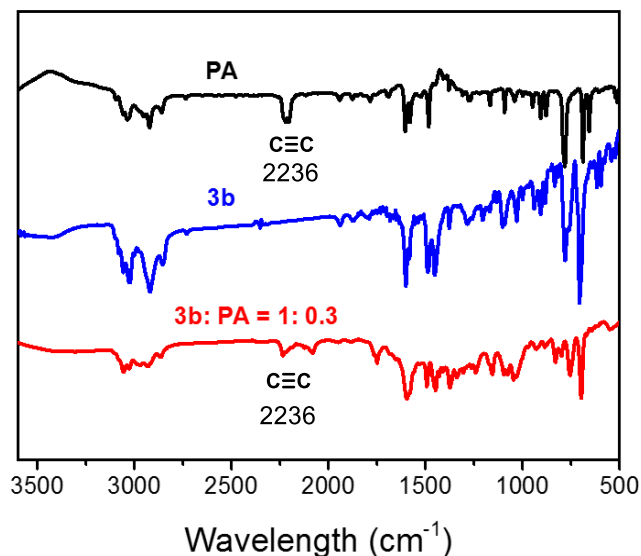

**Figure S87.** FT-IR spectrum of PA, **3b** and the **3b**/PA mixture with a molar ratio of 1 : 0.3.

The IR spectrum of the **3b**/PA mixture with a molar ratio of 1 : 0.3 showed a sharp peak at 2236 cm<sup>-1</sup>, identifying the presence of the C≡C triple bond in the products (Figure S87).

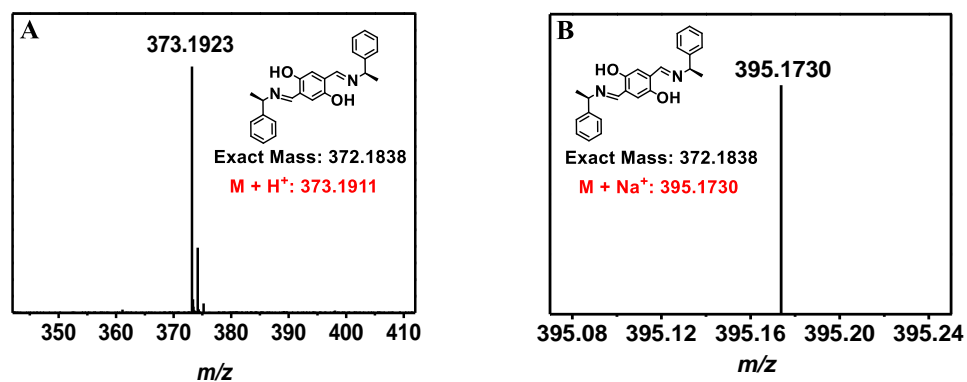

**Figure S88.** High resolution ESI-MS spectra of oligomer obtained from PA polymerization by use of **3b** under the PA: **3b** molar ratio 5: 1.

The high resolution ESI-MS spectra of oligomer sample obtained from PA oligomerization by use of binuclear Rh complex **3b** under the PA/Rh molar ratio 5/1 confirmed the formation of neutral 2,5-phenyloxydiimine ligand as characterization of the peaks at 373.1923 m/z (M + H<sup>+</sup>) and 395.1730 m/z (M + Na<sup>+</sup>) (Figure S88, A–B).

**Table S1.** X-ray diffraction experimental details for complexes **1a** and **(1-4)b**.

|                                          | <b>1a</b>                           | <b>1b</b>                           | <b>2b</b>                            | <b>3b</b>                           | <b>4b</b>                            |
|------------------------------------------|-------------------------------------|-------------------------------------|--------------------------------------|-------------------------------------|--------------------------------------|
| Empirical formula                        | C23H26NORh                          | C24H31NO3Rh                         | C45H43N2O2Rh2Cl3                     | C19H19NORh                          | C21H20NORh                           |
| Formula weight                           | 435.36                              | 484.41                              | 955.98                               | 380.26                              | 405.29                               |
| Temperature (K)                          | 105.4                               | 153.15                              | 153.15                               | 293(2)                              | 153.15                               |
| Crystal system                           | monoclinic                          | monoclinic                          | monoclinic                           | monoclinic                          | monoclinic                           |
| Space group                              | P2 <sub>1</sub>                     | P2 <sub>1</sub>                     | P2 <sub>1</sub>                      | P2 <sub>1</sub>                     | C2                                   |
| a (Å)                                    | 12.96235(17)                        | 10.222(2)                           | 19.411(4)                            | 12.960(3)                           | 17.031(3)                            |
| b (Å)                                    | 10.15759(11)                        | 9.1756(18)                          | 10.281(2)                            | 9.900(2)                            | 9.954(2)                             |
| c (Å)                                    | 14.61931(18)                        | 12.967(3)                           | 9.972(2)                             | 13.100(3)                           | 11.038(2)                            |
| $\alpha$ (°)                             | 90                                  | 90                                  | 90                                   | 90                                  | 90                                   |
| $\beta$ (°)                              | 102.9424(12)                        | 112.96(3)                           | 94.88(3)                             | 109.53(3)                           | 111.66(3)                            |
| $\gamma$ (°)                             | 90                                  | 90                                  | 90                                   | 90                                  | 90                                   |
| Volume (Å <sup>3</sup> )                 | 1875.97(4)                          | 1119.9(4)                           | 1982.8(7)                            | 1584.1(6)                           | 1739.0(6)                            |
| Z                                        | 4                                   | 2                                   | 2                                    | 4                                   | 4                                    |
| Calc. $\rho$ (g/cm <sup>3</sup> )        | 1.541                               | 1.437                               | 1.601                                | 1.594                               | 1.548                                |
| $\mu$ (mm <sup>-1</sup> )                | 0.922                               | 0.786                               | 1.076                                | 1.079                               | 0.988                                |
| Crystal size (mm <sup>3</sup> )          | 0.25 × 0.24 × 0.20                  | 0.23 × 0.2 × 0.17                   | 0.15 × 0.1 × 0.08                    | 0.45 × 0.43 × 0.42                  | 0.21 × 0.05 × 0.03                   |
| Radiation                                | MoK $\alpha$ ( $\lambda$ = 0.71073) | MoK $\alpha$ ( $\lambda$ = 0.71073) | MoK $\alpha$ ( $\lambda$ = 0.710747) | MoK $\alpha$ ( $\lambda$ = 0.71073) | MoK $\alpha$ ( $\lambda$ = 0.710747) |
| 2 $\theta$ range for data collection (°) | 6.22 to 51.98                       | 5.6 to 55                           | 4.1 to 50                            | 5.42 to 63                          | 3.98 to 54.94                        |
| Goodness-of-fit on F <sup>2</sup>        | 1.031                               | 1.055                               | 1.127                                | 1.037                               | 1.133                                |
| R1, wR2 [ $I \geq 2\sigma(I)$ ]          | 0.0273, 0.0543<br>0.0308, 0.0565    | 0.0318, 0.0734<br>0.0324, 0.0741    | 0.0818, 0.2208<br>0.0965, 0.2663     | 0.0411, 0.0810<br>0.0440, 0.0834    | 0.0572, 0.1621<br>0.0710, 0.2138     |
| Flack parameter                          | -0.02(2)                            | 0.04(3)                             | 0.06(11)                             | 0.028(15)                           | -0.02(10)                            |
